# Supplementary material
Source: PubMed Central journal article supplement (PMC2760470)

## Stereoselective Synthesis of Benzannulated Spiroketal: Influence of the Aromatic Ring on Reactivity and Conformation

Guodong Liu,<sup>†</sup> Jacqueline M. Wurst,<sup>‡</sup> and Derek S. Tan<sup>†,‡</sup>

*Molecular Pharmacology and Chemistry Program,<sup>†</sup>  
Tri-Institutional Training Program in Chemical Biology,<sup>‡</sup>  
and Tri-Institutional Research Program,  
Memorial Sloan–Kettering Cancer Center,  
1275 York Avenue, Box 422, New York, New York 10065*

### Supporting Information

|      |                                                                                                                                     |     |
|------|-------------------------------------------------------------------------------------------------------------------------------------|-----|
| I.   | Materials and methods                                                                                                               | S2  |
| II.  | Synthesis of sidechain precursors ( <b>S1a–i</b> , <b>S2</b> )                                                                      | S2  |
|      | A. Acetylation of alcohols and phenols ( <b>S1a–d,f,h,i</b> , <b>S2</b> )                                                           | S2  |
|      | B. Synthesis of benzyl bromide sidechain precursors ( <b>S1e,g</b> )                                                                | S5  |
| III. | Attachment of C1 sidechains via cross coupling reactions ( <b>2a–r</b> )                                                            | S6  |
|      | A. Stille coupling of aryl bromides (n = 0) ( <b>2a–c,j–l</b> )                                                                     | S6  |
|      | B. Stille coupling of benzyl bromides (n = 1) ( <b>2d,e,g,m,n,p</b> )                                                               | S10 |
|      | C. <i>B</i> -Alkyl Suzuki–Miyaura coupling of styrenes and allyl benzenes (n = 2,3) ( <b>2f,h,i,o,q,r</b> )                         | S13 |
| IV.  | Spirocyclization with retention of configuration (Ti[ <i>Oi</i> -Pr] <sub>4</sub> ) ( <b>4a–r</b> )                                 | S17 |
| V.   | Spirocyclization with inversion of configuration (MeOH or AcOH) ( <b>5a–r</b> )                                                     | S26 |
|      | A. MeOH-induced spirocyclization ( <b>5a,b,d,j,m</b> )                                                                              | S26 |
|      | B. AcOH-induced spirocyclization ( <b>5e–i,k,n–r</b> )                                                                              | S29 |
| VI.  | Desilylation of spiroketals ( <b>7</b> , <b>8</b> )                                                                                 | S35 |
| VII. | <sup>1</sup> H-NMR and <sup>13</sup> C-NMR spectra ( <b>S1</b> , <b>S2</b> , <b>2</b> , <b>4</b> , <b>5</b> , <b>7</b> , <b>8</b> ) | S37 |

---

## **I. MATERIALS AND METHODS**

Reagents were obtained from Aldrich Chemical (www.sigma-aldrich.com), Strem (www.strem.com), or Acros Organics (www.fishersci.com) and used without further purification unless otherwise indicated. Solvents (Optima grade) were obtained from Fisher Scientific (www.fishersci.com), degassed with Ar, and purified on a solvent drying system as described<sup>1</sup> unless otherwise indicated. Reactions were performed in flame-dried glassware under positive Ar pressure with magnetic stirring. Cold baths were generated as follows: 0 °C, wet ice/water; -44 °C, dry ice/CH<sub>3</sub>CN; -63 °C, dry ice/chloroform; -78 °C, dry ice/acetone.

TLC was performed on 0.25 mm E. Merck silica gel 60 F254 plates and visualized under UV light (254 nm) or by staining with potassium permanganate (KMnO<sub>4</sub>), cerium ammonium molybdenate (CAM). Silica flash chromatography was performed on E. Merck 230–400 mesh silica gel 60. Parallel chromatography was performed on an ISCO CombiFlash OptiX 10 instrument with RediSep silica gel normal phase columns using a flow rate of 10.0 mL/min and a gradient of 5–10% MeOH in CH<sub>2</sub>Cl<sub>2</sub> in hexanes over 20 min.

Optical rotations were recorded on a JASCO model PTC-103T digital polarimeter. IR spectra were recorded on a Bruker Optics Tensor 27 FTIR spectrometer with peaks reported in cm<sup>-1</sup>. NMR spectra were recorded on Bruker UltraShield Plus 500 MHz instruments at 24 °C in CDCl<sub>3</sub> unless otherwise indicated. Chemical shifts are expressed in ppm relative to TMS (<sup>1</sup>H, 0 ppm) or solvent signals: CDCl<sub>3</sub> (<sup>1</sup>H, 7.26 ppm; <sup>13</sup>C, 77.0 ppm), C<sub>6</sub>D<sub>6</sub> (<sup>1</sup>H, 7.16 ppm; <sup>13</sup>C, 128.0 ppm), CD<sub>2</sub>Cl<sub>2</sub> (<sup>1</sup>H, 5.31 ppm; <sup>13</sup>C, 53.5 ppm), CD<sub>3</sub>OD (<sup>1</sup>H, 3.31 ppm; <sup>13</sup>C, 63.1 ppm) or acetone-*d*<sub>6</sub> (<sup>1</sup>H, 2.05 ppm; <sup>13</sup>C, 206.2 ppm); coupling constants are expressed in Hz. Mass spectra were obtained at the MSKCC Analytical Core Facility on a Waters Acquity TM mass spectrometer by electrospray (ESI) ionization or atmospheric pressure chemical ionization (AP-CI).

N.B.: Atom numbering in IUPAC compound names herein does not correspond to conventional carbohydrate nomenclature and is used for naming purposes only. Atom numbering in the text and paper corresponds to conventional carbohydrate nomenclature. Compounds not cited in the paper are numbered herein **S1–S4**.

---

## **II. SYNTHESIS OF SIDECCHAIN PRECURSORS (S1a–i, S2)**

### **A. GENERAL PROCEDURE FOR ACETYLATION OF ALCOHOLS AND PHENOLS (S1a–d,f,h,i, S2)**

The commercially available alcohol or phenol was dissolved in CH<sub>2</sub>Cl<sub>2</sub> (0.1 M) and the solution was cooled to 0 °C. Triethylamine (2.0 equiv) and 4-dimethylaminopyridine (0.1 equiv) were added, followed by addition of acetyl chloride (1.5 equiv). After 30 min, the reaction mixture was warmed up to rt and stirred for 2 h. The mixture was quenched with satd aq NaHCO<sub>3</sub> and the aqueous layer was separated and extracted with Et<sub>2</sub>O. The combined extracts were washed (H<sub>2</sub>O, brine), dried (Na<sub>2</sub>SO<sub>4</sub>), filtered, and concentrated by rotary evaporation. Purification by silica flash chromatography provided **S1a–d,f,h,i** and **S2**.

---

<sup>1</sup> Pangborn, A. B.; Giardello, M. A.; Grubbs, R. H.; Rosen, R. K.; Timmers, F. J. *Organometallics* **1996**, *15*, 1518–1520.

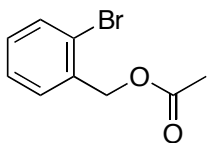

**2-Bromobenzyl acetate (S1a).**<sup>2</sup> Clear oil (1.50 g, 63%). **TLC:**  $R_f$  0.29 (9:1 hexanes/EtOAc). **IR** (NaCl, film): 3021, 2959, 2898, 1744 (C=O st), 1593, 1570, 1472, 1440, 1379, 1229, 1029 (C–Br st), 753. **<sup>1</sup>H-NMR** (500 MHz):  $\delta$  7.55 (dd, 1H,  $J = 8.0, 1.2$ ), 7.40–7.38 (m, 1H), 7.30 (td, 1H,  $J = 7.6, 1.1$ ), 7.18–7.14 (m, 1H), 5.18 (s, 2H), 2.12 (s, 3H). **<sup>13</sup>C-NMR** (125 MHz):  $\delta$  170.5, 135.2, 132.8, 129.8, 129.7, 127.5, 123.4, 65.7, 20.8. **ESI-MS**  $m/z$  (rel int): (pos) 250.9 ( $[M+Na]^+$ , 100).

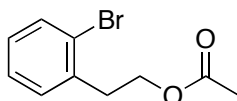

**2-Bromophenethyl acetate (S1b).**<sup>3</sup> Clear oil (1.15 g, 96%). **TLC:**  $R_f$  0.55 (4:1 hexanes/EtOAc). **IR** (NaCl, film): 3060, 2958, 2899, 1740 (C=O st), 1568, 1472, 1439, 1384, 1364, 1238, 1037 (C–Br st), 752. **<sup>1</sup>H-NMR** (500 MHz):  $\delta$  7.54 (d, 1H,  $J = 7.8$ ), 7.24 (dd, 2H,  $J = 5.0, 0.9$ ), 7.09 (dt, 1H,  $J = 8.1, 4.5$ ), 4.30 (t, 2H,  $J = 7.0$ ), 3.08 (t, 2H,  $J = 7.0$ ), 2.03 (s, 3H). **<sup>13</sup>C-NMR** (125 MHz):  $\delta$  171.0, 137.2, 133.0, 131.1, 128.4, 127.5, 124.7, 63.4, 35.3, 21.0. **ESI-MS**  $m/z$  (rel int): (pos) 265.0 ( $[M+Na]^+$ , 100).

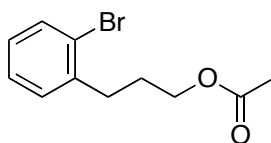

**3-(2-Bromophenyl)propyl acetate (S1c).**<sup>4</sup> Clear oil (2.4 g, 91%). **TLC:**  $R_f$  0.28 (10:1 hexanes/EtOAc). **IR** (NaCl, film): 3013, 2897, 2868, 1739 (C=O st), 1541, 1470, 1440, 1387, 1367, 1240, 1039 (C–Br st), 1023, 752. **<sup>1</sup>H-NMR** (500 MHz):  $\delta$  7.52 (d, 1H,  $J = 8.0$ ), 7.22 (m, 2H), 7.07–7.04 (m, 1H), 4.11 (t, 2H,  $J = 6.4$ ), 2.81 (t, 2H,  $J = 7.7$ ), 2.06 (d, 3H,  $J = 0.7$ ), 1.99–1.93 (m, 2H). **<sup>13</sup>C-NMR** (125 MHz):  $\delta$  171.2, 140.6, 133.0, 130.4, 127.9, 127.6, 124.5, 63.8, 32.6, 28.7, 21.1. **ESI-MS**  $m/z$  (rel int): (pos) 278.9 ( $[M+Na]^+$ , 100); (neg) 254.9 ( $[M-H]^-$ , 100).

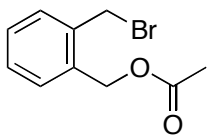

**2-(Bromomethyl)benzyl acetate (S1d).**<sup>5</sup> Clear oil (250 mg, 50%). **TLC:**  $R_f$  0.14 (15:1 hexanes/EtOAc). **IR** (NaCl, film): 3068, 3029, 2971, 2902, 1740 (C=O st), 1494, 1453, 1380, 1362, 1229, 1027 (C–Br st), 894, 769, 731. **<sup>1</sup>H-NMR** (500 MHz):  $\delta$  7.43–7.39 (m, 2H), 7.36–

<sup>2</sup> Shirini, F.; Zolfigol, M. A.; Mohammadi, K. *Phosphorus, Sulfur and Silicon and the Related Elements* **2003**, *15*, 1617-1621.

<sup>3</sup> Sontag, D. *Ann. Chim.* **1934**, *1*, 359–438.

<sup>4</sup> Beak, P.; Selling, G. W. *J. Org. Chem.* **1989**, *54*, 5574–5580.

<sup>5</sup> Sato, H.; Isono, N.; Okamura, K.; Date, T.; Mori, M. *Tetrahedron Lett.* **1994**, *35*, 2035–2038.

7.34 (m, 2H), 5.27 (s, 2H), 4.69 (s, 2H), 2.11 (s, 3H).  $^{13}\text{C-NMR}$  (125 MHz):  $\delta$  170.8, 136.2, 134.6, 130.5, 130.3, 129.15, 129.11, 63.6, 43.6, 21.1. **ESI-MS**  $m/z$  (rel int): (pos) 264.9 ( $[\text{M}+\text{Na}]^+$ , 100).

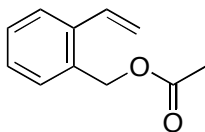

**2-(Vinyl)phenyl acetate (S1f).**<sup>6</sup> Clear oil (1.22 g, 76%). **TLC:**  $R_f$  0.23 (15:1 hexanes/EtOAc). **IR** (NaCl, film): 3066, 3028, 2960, 2932, 2854, 1740 (C=O st), 1628 (Ar C=C st), 1485, 1454, 1420, 1380, 1362, 1228, 1024, 992, 773.  $^1\text{H-NMR}$  (500 MHz):  $\delta$  7.56–7.54 (m, 1H), 7.37–7.32 (m, 2H), 7.28 (td, 1H,  $J = 7.4, 1.4$ ), 6.98 (dd, 1H,  $J = 17.4, 11.0$ ), 5.70 (dd, 1H,  $J = 17.4, 1.3$ ), 5.37 (dd, 1H,  $J = 11.0, 1.3$ ), 5.19 (s, 2H), 2.10 (s, 3H).  $^{13}\text{C-NMR}$  (125 MHz):  $\delta$  170.9, 137.5, 133.7, 132.8, 129.9, 128.9, 127.9, 126.1, 116.9, 64.4, 21.1. **ESI-MS**  $m/z$  (rel int): (pos) 198.9 ( $[\text{M}+\text{Na}]^+$ , 100).

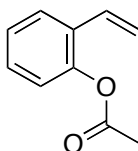

**2-(Vinyl)benzyl acetate (S1h).**<sup>7</sup> Clear oil (400 mg, 41%). **TLC:**  $R_f$  0.56 (4:1 hexanes/EtOAc). **IR** (NaCl, film): 3068, 3024, 2936, 1763 (C=O st), 1630 (Ar C=C st), 1484, 1451, 1424, 1370, 1206, 1097, 1010, 914, 827, 765.  $^1\text{H-NMR}$  (500 MHz):  $\delta$  7.59 (dd, 1H,  $J = 7.7, 1.7$ ), 7.30 (td, 1H,  $J = 7.7, 1.7$ ), 7.23 (tdd, 1H,  $J = 7.5, 1.3, 0.5$ ), 7.06 (dd, 1H,  $J = 8.0, 1.3$ ), 6.77 (dd, 1H,  $J = 17.6, 11.1$ ), 5.78 (dd, 1H,  $J = 17.6, 1.1$ ), 5.35 (dd, 1H,  $J = 11.1, 1.1$ ), 2.34 (s, 3H).  $^{13}\text{C-NMR}$  (125 MHz):  $\delta$  169.3, 148.1, 130.4, 130.3, 128.8, 126.6, 126.3, 122.7, 116.5, 21.0. **ESI-MS**  $m/z$  (rel int): (pos) 163.0 ( $[\text{M}+\text{H}]^+$ , 100); (neg) 160.9 ( $[\text{M}-\text{H}]^-$ , 100).

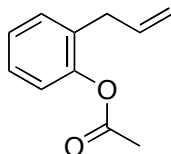

**2-Allylphenyl acetate (S1i).**<sup>8</sup> Clear oil (2.20 g, 84%). **TLC:**  $R_f$  0.30 (15:1 hexanes/EtOAc). **IR** (NaCl, film): 3078, 3033, 3009, 2979, 2913, 2845, 1762 (C=O st), 1640 (Ar C=C st), 1489, 1452, 1433, 1370, 1207, 1171, 1009, 916, 752.  $^1\text{H-NMR}$  (500 MHz):  $\delta$  7.29–7.26 (m, 2H), 7.21 (td, 1H,  $J = 7.4, 1.7$ ), 7.08–7.06 (m, 1H), 5.97–5.89 (m, 1H), 5.12–5.08 (m, 2H), 3.34 (d, 2H,  $J = 6.6$ ), 2.33 (s, 3H).  $^{13}\text{C-NMR}$  (125 MHz):  $\delta$  169.4, 149.0, 136.0, 132.0, 130.5, 127.5, 126.2, 122.5, 116.3, 34.8, 21.0. **ESI-MS**  $m/z$  (rel int): (pos) 198.9 ( $[\text{M}+\text{Na}]^+$ , 100).

<sup>6</sup> Begasse, B.; Hercouet, A.; Le Corre, M. *Tetrahedron Lett.* **1979**, 23, 2149–2150.

<sup>7</sup> Yamaguchi, M.; Hayashi, A.; Hiramata, M. *J. Am. Chem. Soc.* **1995**, 117, 1151–1152.

<sup>8</sup> Phukan, P. *Tetrahedron Lett.* **2004**, 45, 4785–4787.



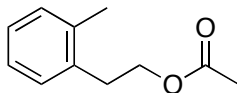

**2-Methylphenethyl acetate (S2).**<sup>9</sup> Clear oil (424 mg, 65%). **TLC:**  $R_f$  0.24 (15:1 hexanes/EtOAc). **IR** (NaCl, film): 3064, 3023, 2957, 1742 (C=O st), 1492, 1461, 1382, 1366, 1236, 1034, 760, 726. **<sup>1</sup>H-NMR** (500 MHz):  $\delta$  7.19 (m, 4H), 4.29 (t, 2H,  $J = 7.4$ ), 2.98 (t, 2H,  $J = 7.4$ ), 2.38 (s, 3H), 2.07 (s, 3H). **<sup>13</sup>C-NMR** (125 MHz):  $\delta$  171.0, 136.5, 135.9, 130.4, 129.5, 126.8, 126.1, 64.1, 32.4, 21.0, 19.4. **ESI-MS**  $m/z$  (rel int): (pos) 200.8 ([M+Na]<sup>+</sup>, 100); (neg) 212.9 ([M+Cl]<sup>-</sup>, 100).

## B. SYNTHESIS OF BENZYL BROMIDE SIDECHAIN PRECURSORS (S1e,g)

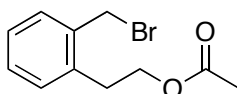

**2-(Bromomethyl)phenethyl acetate (S1e).**<sup>10</sup> To a solution of *o*-tolyl acetate (424 Mg, 2.4 mmol) in benzene (12 mL) was added *N*-bromosuccinimide (424 g, 2.4 mmol) and AIBN (195 mg, 1.2 mmol). The reaction mixture was heated to reflux for 6 h, then cooled to rt and diluted with CH<sub>2</sub>Cl<sub>2</sub> (12 mL). The organic fraction was washed with satd aq Na<sub>2</sub>CO<sub>3</sub> (12 mL), H<sub>2</sub>O (12 mL), dried (MgSO<sub>4</sub>), filtered, and concentrated by rotary evaporation. Purification by silica flash chromatography provided **S1e** as a clear oil (200 mg, 33%). **TLC:**  $R_f$  0.29 (1:1 hexanes/CH<sub>2</sub>Cl<sub>2</sub>). **IR** (NaCl, film): 3063, 3023, 2959, 2897, 1731 (C=O st), 1492, 1455, 1385, 1364, 1238, 1037 (C-Br st), 762. **<sup>1</sup>H-NMR** (500 MHz):  $\delta$  7.36 (dd, 1H,  $J = 7.8, 1.5$ ), 7.30–7.27 (m, 1H), 7.25–7.21 (m, 2H), 4.59 (s, 2H), 4.33 (t, 2H,  $J = 7.3$ ), 3.09 (t, 2H,  $J = 7.3$ ), 2.06 (s, 3H). **<sup>13</sup>C-NMR** (125 MHz):  $\delta$  171.0, 136.8, 136.2, 130.8, 130.4, 129.2, 127.4, 64.3 (2C), 31.5, 21.1. **ESI-MS**  $m/z$  (rel int): (pos) 280.9 ([M+Na]<sup>+</sup>, 100).

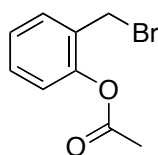

**2-(Bromomethyl)phenyl acetate (S1g).**<sup>11</sup> Prepared from *o*-tolyl acetate as described for **S1e** above. Clear oil (1.32 g, 87%). **TLC:**  $R_f$  0.25 (20:1 hexanes/EtOAc). **IR** (NaCl, film): 3064, 3037, 2980, 2937, 1767 (C=O st), 1585, 1490, 1453, 1434, 1369, 1209, 1177, 1040 (C-Br st), 916, 789, 757. **<sup>1</sup>H-NMR** (500 MHz):  $\delta$  7.42 (dd, 1H,  $J = 7.6, 1.7$ ), 7.35 (td, 1H,  $J = 7.8, 1.7$ ), 7.22 (td, 1H,  $J = 7.5, 1.2$ ), 7.14 (dd, 1H,  $J = 8.1, 1.2$ ), 4.43 (s, 2H), 2.37 (s, 3H). **<sup>13</sup>C-NMR** (125 MHz):  $\delta$  168.9, 149.1, 130.9, 129.9, 129.6, 126.4, 123.2, 27.7, 21.0. **ESI-MS**  $m/z$  (rel int): (pos) 250.9 ([M+Na]<sup>+</sup>, 100); (neg) 226.9 ([M-H]<sup>-</sup>, 100).

<sup>9</sup> Yus, M.; Gomis, J. *Tetrahedron* **2003**, *59*, 4967–4971.

<sup>10</sup> Payne, J. R.; Toscano, M. D.; Bulloch, E. M.; Abell, A. D.; Abell, C. *Org. Biomol. Chem.* **2005**, *3*, 2271–2281.

<sup>11</sup> Hercouet, A.; Le Corre, M. *Tetrahedron* **1981**, *37*, 2867–2873.

### III. ATTACHMENT OF C1 SIDECHAINS VIA CROSS COUPLING REACTIONS (2a-r)

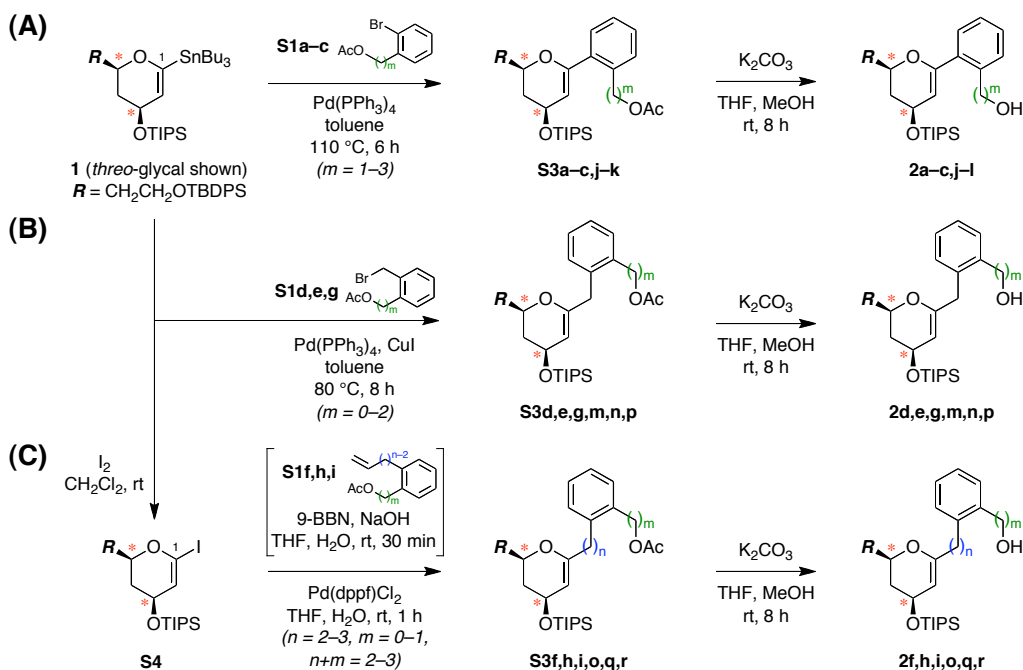

**Figure S1.** Synthesis of spirocyclization substrates **2a-r** from *threo* and *erythro*-glycal stannanes **1** by (A) Stille cross coupling of aryl bromides, (B) Stille cross coupling of benzyl bromides in the presence of CuI, or (C) iodination followed by *B*-alkyl Suzuki–Miyaura cross coupling of styrenes and allyl benzenes.

#### A. GENERAL PROCEDURE FOR STILLE COUPLING OF ARYL BROMIDES ( $n = 0$ ) (**2a-c,j-l**)<sup>12</sup>

To a stirred solution of the glycal stannane **1** (1.0 equiv), prepared enantioselectively as previously described,<sup>13</sup> in anhyd toluene (0.1 M) under Ar was added the appropriate aryl bromide sidechain **S1a-c** (1.2 equiv) and  $\text{Pd}(\text{PPh}_3)_4$  (0.2 equiv). The yellow solution was shielded from light with aluminum foil<sup>14</sup> and heated to reflux 6 h, then cooled to rt and concentrated to dryness. Purification by silica flash chromatography yielded the partially purified *O*-acetyl C1-aryl glycals **S3a-c,j-l**. These glycals were then dissolved in 1:1 THF/MeOH (0.1 M) and  $\text{K}_2\text{CO}_3$  (2.0 equiv) was added.<sup>13</sup> After stirring for 12 h, the mixture was diluted with  $\text{Et}_2\text{O}$ , washed with satd aq  $\text{NaHCO}_3$ , dried ( $\text{Na}_2\text{SO}_4$ ), and concentrated by rotary evaporation. Purification by silica flash chromatography (20:1–10:1 hexanes/ $\text{EtOAc}$  with 1%  $\text{Et}_3\text{N}$ ) afforded the free alcohols **2a-c,j-l**.

<sup>12</sup> Friesen, R. W.; Sturino, C. F. *J. Org. Chem.* **1990**, *55*, 2572–2574.

<sup>13</sup> (a) Potuzak, J. S.; Moilanen, S. B.; Tan, D. S. *J. Am. Chem. Soc.* **2005**, *127*, 13796–13797. (b) Moilanen, S. B.; Tan, D. S. *Org. Biomol. Chem.* **2005**, *3*, 798–803.

<sup>14</sup> Crawforth, C. M.; Burling, S.; Fairlamb, I. J. S.; Kapdi, A.; Taylor, R. J. K.; Whitwood, A. C. *Tetrahedron* **2005**, *61*, 9736–9751.

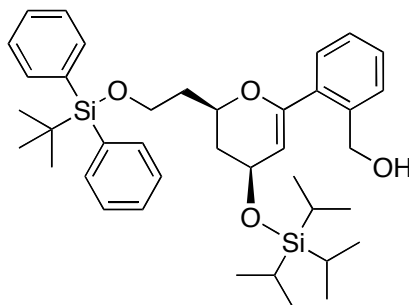

**(-)-(2-((2R,4S)-2-(2-(tert-Butyldiphenylsilyloxy)ethyl)-4-(triisopropylsilyloxy)-3,4-dihydro-2H-pyran-6-yl)phenyl)methanol (2a).** Clear oil (50 mg, 65%). TLC:  $R_f$  0.26 (4:1 hexanes/EtOAc).  $[\alpha]_D^{19}$ :  $-18.5^\circ$  ( $c$  2.3,  $\text{CHCl}_3$ ). IR (NaCl, film): 3456 (O–H st), 3065, 2944, 2864, 1655, 1465, 1429, 1368, 1337, 1295, 1264, 1099 (C–O st), 884, 745, 700.  $^1\text{H-NMR}$  (500 MHz,  $\text{C}_6\text{D}_6$ ):  $\delta$  7.86–7.84 (m, 4H), 7.55 (dd, 1H,  $J = 7.6, 1.3$ ), 7.51 (dd, 1H,  $J = 7.6, 0.7$ ), 7.33–7.29 (m, 6H), 7.22 (td, 1H,  $J = 7.5, 1.4$ ), 7.13 (td, 1H,  $J = 7.5, 1.3$ ), 5.28 (dd, 1H,  $J = 2.1, 1.5$ ), 4.82–4.78 (m, 3H), 4.47 (dddd, 1H,  $J = 11.2, 7.6, 5.1, 2.2$ ), 3.93 (ddd, 1H,  $J = 10.5, 7.7, 5.1$ ), 3.84 (dt, 1H,  $J = 10.7, 5.5$ ), 2.22 (ddt, 1H,  $J = 13.1, 6.6, 1.7$ ), 2.05–1.96 (m, 3H), 1.87–1.81 (m, 1H), 1.26–1.22 (m, 30H).  $^{13}\text{C-NMR}$  (125 MHz,  $\text{C}_6\text{D}_6$ ):  $\delta$  154.5, 140.4, 136.0, 134.1, 134.0, 130.0, 129.2, 129.1, 128.9, 128.4, 127.6, 106.5, 73.1, 64.8, 63.9, 60.6, 38.3, 38.2, 27.2, 19.5, 18.4, 12.7. ESI-MS  $m/z$  (rel int): (pos) 667.1 ( $[\text{M}+\text{Na}]^+$ , 100).

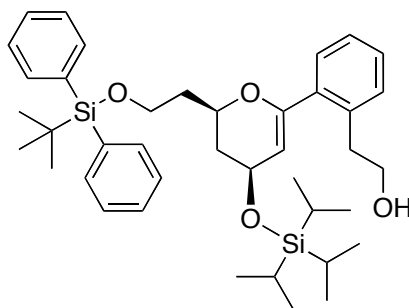

**(-)-2-(2-((2R,4S)-2-(2-(tert-Butyldiphenylsilyloxy)ethyl)-4-(triisopropylsilyloxy)-3,4-dihydro-2H-pyran-6-yl)phenyl)ethanol (2b).** Clear oil (51 mg, 78%). TLC:  $R_f$  0.40 (4:1 hexanes/EtOAc).  $[\alpha]_D^{19}$ :  $-14.0^\circ$  ( $c$  2.6,  $\text{CHCl}_3$ ). IR (NaCl, film): 3430 (O–H st), 3064, 3022, 2948, 2764, 1780, 1515, 1466, 1430, 1385, 1364, 1102, 1065 (C–O st), 885, 751, 700.  $^1\text{H-NMR}$  (500 MHz):  $\delta$  7.69–7.66 (m, 4H), 7.45–7.32 (m, 7H), 7.30 (dd, 1H,  $J = 7.5, 1.5$ ), 7.24–7.20 (m, 2H), 4.91 (t, 1H,  $J = 1.8$ ), 4.71 (ddd, 1H,  $J = 8.8, 6.6, 2.2$ ), 4.40 (dddd, 1H,  $J = 11.1, 7.5, 5.2, 2.0$ ), 3.88 (ddd, 1H,  $J = 10.5, 7.6, 5.2$ ), 3.84–3.79 (m, 3H), 3.01 (dt, 1H,  $J = 13.4, 6.7$ ), 2.89 (dt, 1H,  $J = 13.5, 6.7$ ), 2.18 (ddt, 1H,  $J = 13.2, 6.6, 1.7$ ), 2.05–1.99 (m, 1H), 1.90–1.80 (m, 2H), 1.72 (t, 1H,  $J = 5.7$ ), 1.12–1.07 (m, 30H).  $^{13}\text{C-NMR}$  (125 MHz):  $\delta$  154.1, 136.8, 135.7, 133.9, 133.7, 130.2, 129.9, 129.8, 128.8, 127.8, 126.5, 106.5, 72.8, 64.4, 63.7, 60.3, 37.9, 37.8, 37.0, 27.0, 19.3, 18.3, 12.5. ESI-MS  $m/z$  (rel int): (pos) 681.1 ( $[\text{M}+\text{Na}]^+$ , 100); (neg) 703.1 ( $[\text{M}+\text{HCOO}]^-$ , 100).

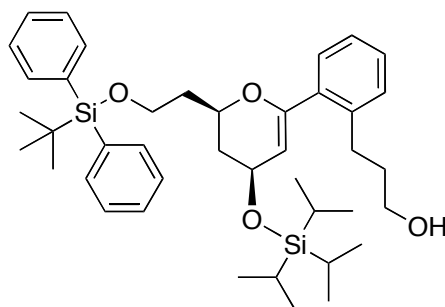

**(-)-3-(2-((2R,4S)-2-(2-(tert-Butyl)diphenylsilyloxy)ethyl)-4-(triisopropylsilyloxy)-3,4-dihydro-2H-pyran-6-yl)phenylpropan-1-ol (2c).** Clear oil (24 mg, 82%). TLC:  $R_f$  0.34 (4:1 hexanes/EtOAc).  $[\alpha]_D^{19}$ :  $-20.4^\circ$  ( $c$  1.2,  $\text{CHCl}_3$ ). IR (NaCl, film): 3444 (O–H st), 3065, 3018, 2942, 2865, 1596, 1464, 1430, 1377, 1290, 1099, 1068 (C–O st), 884, 748, 700.  $^1\text{H-NMR}$  (500 MHz):  $\delta$  7.67–7.63 (m, 4H), 7.43–7.34 (m, 4H), 7.33–7.30 (m, 2H), 7.29–7.26 (m, 2H), 7.21–7.15 (m, 2H), 4.84 (t, 1H,  $J = 1.8$ ), 4.70 (ddd, 1H,  $J = 8.8, 6.7, 2.2$ ), 4.37 (dddd, 1H,  $J = 11.2, 7.5, 5.3, 2.0$ ), 3.86 (ddd, 1H,  $J = 10.4, 7.6, 5.3$ ), 3.79 (dt, 1H,  $J = 10.7, 5.5$ ), 3.56 (t, 2H,  $J = 6.1$ ), 2.79 (t, 2H,  $J = 7.6$ ), 2.18 (ddt, 1H,  $J = 13.2, 6.7, 1.7$ ), 2.02 (ddt, 1H,  $J = 13.8, 7.9, 5.7$ ), 1.91–1.80 (m, 4H), 1.09–1.05 (m, 30H).  $^{13}\text{C-NMR}$  (125 MHz):  $\delta$  154.4, 140.7, 136.5, 135.7, 133.9, 133.8, 129.7, 129.6, 128.7, 127.8, 125.9, 105.9, 72.7, 64.6, 62.1, 60.4, 38.0, 37.9, 34.5, 29.4, 27.0, 19.4, 18.2, 12.4. ESI-MS  $m/z$  (rel int): (pos) 695.1 ( $[\text{M}+\text{Na}]^+$ , 100).

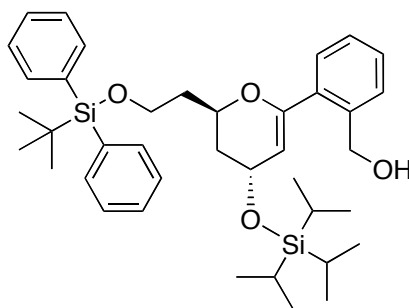

**(+)-2-((2R,4R)-2-(2-(tert-Butyl)diphenylsilyloxy)ethyl)-4-(triisopropylsilyloxy)-3,4-dihydro-2H-pyran-6-yl)phenylmethanol (2j).** Clear oil (120 mg, 55%). TLC:  $R_f$  0.28 (10:1 hexanes/EtOAc).  $[\alpha]_D^{19}$ :  $+79.8^\circ$  ( $c$  0.7,  $\text{CHCl}_3$ ). IR (NaCl, film): 3445 (O–H st), 3064, 3024, 2936, 2863, 1650, 1463, 1428, 1383, 1357, 1339, 1296, 1099 (C–O st), 1006, 882, 739, 700.  $^1\text{H-NMR}$  (500 MHz):  $\delta$  7.67–7.64 (m, 4H), 7.44–7.33 (m, 7H), 7.32–7.28 (m, 3H), 5.16 (dd, 1H,  $J = 5.3, 1.4$ ), 4.60 (d, 2H,  $J = 11.7$ ), 4.58–4.53 (m, 1H), 4.42 (ddd, 1H,  $J = 5.3, 3.6, 1.8$ ), 3.89 (ddd, 1H,  $J = 10.5, 8.2, 5.1$ ), 3.81 (dt, 1H,  $J = 10.6, 5.3$ ), 2.38 (t, 1H,  $J = 6.6$ ), 1.97–1.84 (m, 3H), 1.73 (ddd, 1H,  $J = 13.7, 12.1, 3.7$ ), 1.09–1.04 (m, 30H).  $^{13}\text{C-NMR}$  (125 MHz):  $\delta$  155.3, 139.5, 135.7, 133.9, 133.8, 129.8, 129.7, 129.2, 129.1, 127.8, 127.7, 104.2, 69.8, 64.1, 61.4, 60.2, 38.3, 38.0, 27.0, 18.33, 18.31, 12.6. ESI-MS  $m/z$  (rel int): (pos) 667.2 ( $[\text{M}+\text{Na}]^+$ , 100); (neg) 679.2 ( $[\text{M}+\text{Cl}]^-$ , 100).

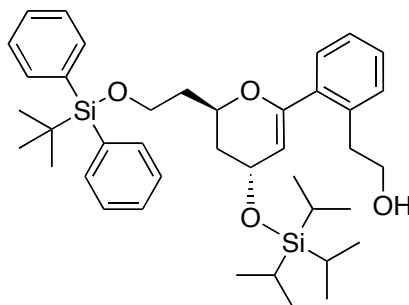

**(+)-2-(2-((2R,4R)-2-(2-(tert-Butyldiphenylsilyloxy)ethyl)-4-(triisopropylsilyloxy)-3,4-dihydro-2H-pyran-6-yl)phenyl)ethanol (2k).** Clear oil (134 mg, 51%). TLC:  $R_f$  0.42 (4:1 hexanes/EtOAc).  $[\alpha]_D^{21}$ : +82.38° (*c* 2.5, CHCl<sub>3</sub>). IR (NaCl, film): 3427 (O–H st), 3064, 2945, 2865, 1560, 1428, 1382, 1342, 1294, 1096 (C–O st), 1006, 741, 700. <sup>1</sup>H-NMR (500 MHz): δ 7.59–7.54 (m, 4H), 7.34–7.24 (m, 4H), 7.23–7.18 (m, 4H), 7.13–7.08 (m, 2H), 4.98 (dd, 1H, *J* = 5.3, 1.5), 4.44 (dddd, 1H, *J* = 12.1, 8.0, 4.3, 1.7), 4.31 (ddd, 1H, *J* = 5.4, 3.6, 1.9), 3.86–3.81 (m, 1H), 3.72 (dt, 3H, *J* = 16.3, 5.8), 2.87 (dt, 1H, *J* = 13.4, 6.6), 2.77 (dt, 1H, *J* = 13.5, 6.8), 1.84–1.78 (m, 2H), 1.76–1.72 (m, 1H), 1.62 (ddd, 2H, *J* = 13.7, 12.1, 3.7), 1.01–0.96 (m, 30H). <sup>13</sup>C-NMR (125 MHz): δ 155.7, 137.4, 137.1, 135.7, 134.0, 133.8, 130.2, 129.8, 129.7, 128.8, 127.8, 126.4, 104.1, 69.3, 63.7, 61.4, 60.2, 38.2, 38.1, 37.0, 27.0, 19.3, 18.3, 12.5. ESI-MS *m/z* (rel int): (pos) 681.2 ([M+Na]<sup>+</sup>, 100).

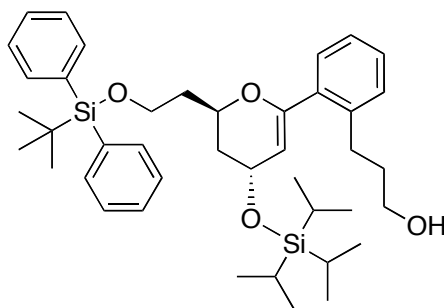

**(+)-3-(2-((2R,4R)-2-(2-(tert-Butyldiphenylsilyloxy)ethyl)-4-(triisopropylsilyloxy)-3,4-dihydro-2H-pyran-6-yl)phenyl)propan-1-ol (2l).** Clear oil (105 mg, 65%). TLC:  $R_f$  0.29 (4:1 hexanes/EtOAc).  $[\alpha]_D^{19}$ : +90.4° (*c* 2.5, CHCl<sub>3</sub>). IR (NaCl, film): 3353 (O–H st), 3064, 3022, 2945, 2864, 1596, 1464, 1428, 1382, 1294, 1099 (C–O st), 1005, 883, 740, 700. <sup>1</sup>H-NMR (500 MHz): δ 7.69–7.66 (m, 4H), 7.44–7.35 (m, 4H), 7.33–7.29 (m, 3H), 7.27–7.25 (m, 1H), 7.21 (d, 1H, *J* = 7.4), 7.17 (td, 1H, *J* = 7.4, 1.2), 5.04 (dd, 1H, *J* = 5.3, 1.4), 4.56–4.51 (m, 1H), 4.42 (ddd, 1H, *J* = 5.3, 3.6, 1.8), 3.92 (ddd, 1H, *J* = 10.3, 8.1, 5.4), 3.83 (dt, 1H, *J* = 10.5, 5.4), 3.52 (app q, 2H, *J* = 5.6), 2.87 (dt, 1H, *J* = 13.8, 7.6), 2.73–2.67 (m, 1H), 1.98–1.92 (m, 2H), 1.91–1.84 (m, 2H), 1.81–1.72 (m, 2H), 1.59 (t, 1H, *J* = 5.6), 1.10–1.06 (m, 30H). <sup>13</sup>C-NMR (125 MHz): δ 156.2, 140.9, 136.9, 135.7, 134.0, 133.9, 129.7, 129.6, 128.8, 127.7, 125.8, 103.6, 69.3, 61.8, 61.6, 60.3, 38.4, 38.1, 34.2, 29.3, 27.0, 19.3, 18.3, 12.5. ESI-MS *m/z* (rel int): (pos) 695.2 ([M+Na]<sup>+</sup>, 100); (neg) 671.2 ([M-H]<sup>-</sup>, 100).

**B. GENERAL PROCEDURE FOR STILLE COUPLING OF BENZYL BROMIDES (n = 1) (2d,e,g,m,n,p)<sup>15</sup>**

To a stirred solution of the glycal stannane **1** (1.0 equiv), prepared as previously described,<sup>13</sup> in anhyd toluene (0.1 M) under Ar was added the appropriate benzyl bromide sidechain **S1d,e,g** (1.2 equiv), CuI (0.4 equiv) and Pd(PPh<sub>3</sub>)<sub>4</sub> (0.2 equiv). The yellow solution shielded from light with aluminum foil was heated to 80 °C for 8 h, and then cooled to rt and concentrated to dryness. Purification by silica flash chromatography yielded the partially purified *O*-acetyl C1-benzyl glycals **S3d,e,g,m,n,p**. These glycals were then dissolved in 1:1 THF/MeOH (0.1 M) and K<sub>2</sub>CO<sub>3</sub> (2.0 equiv) was added.<sup>13</sup> After stirring for 12 h, the mixture was diluted with Et<sub>2</sub>O, washed with satd aq NaHCO<sub>3</sub>, dried (Na<sub>2</sub>SO<sub>4</sub>), and concentrated by rotary evaporation. Purification by silica flash chromatography (20:1–10:1 hexanes/EtOAc with 1% Et<sub>3</sub>N) afforded the free alcohols **2d,e,g,m,n,p**.

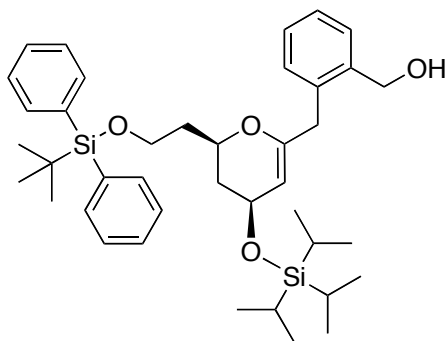

(–)-(2-(((2*R*,4*S*)-2-(2-(*tert*-Butyldiphenylsilyloxy)ethyl)-4-(triisopropylsilyloxy)-3,4-dihydro-2*H*-pyran-6-yl)methyl)phenyl)methanol (**2d**). Clear oil (53 mg, 77%). TLC: *R<sub>f</sub>* 0.49 (4:1 hexanes/EtOAc). [ $\alpha$ ]<sub>D</sub><sup>19</sup>: –12.5° (*c* 2.7, CHCl<sub>3</sub>). IR (NaCl, film): 3442 (O–H st), 3068, 3050, 2937, 2863, 1699, 1464, 1428, 1385, 1088 (C–O st), 1006, 883, 739, 703. <sup>1</sup>H-NMR (500 MHz, C<sub>6</sub>D<sub>6</sub>):  $\delta$  7.88–7.85 (m, 4H), 7.40 (dd, 1H, *J* = 5.3, 3.7), 7.37–7.34 (m, 6H), 7.29–7.25 (m, 1H), 7.18–7.16 (m, 2H), 4.75 (dd, 1H, *J* = 2.2, 1.0), 4.68–4.62 (m, 2H), 4.60–4.56 (m, 1H), 4.31–4.26 (m, 1H), 3.90–3.80 (m, 2H), 3.50–3.42 (m, 2H), 2.11–2.00 (m, 2H), 1.86–1.76 (m, 3H), 1.26 (s, 9H), 1.20–1.09 (m, 21H). <sup>13</sup>C-NMR (125 MHz, C<sub>6</sub>D<sub>6</sub>):  $\delta$  154.8, 140.2, 136.2, 136.0, 134.3, 130.6, 130.0, 129.1, 128.6, 128.4, 127.1, 103.0, 72.4, 64.3, 63.2, 60.7, 38.1, 37.9, 37.4, 27.2, 19.5, 18.4, 12.7. ESI-MS *m/z* (rel int): (pos) 681.1 ([M+Na]<sup>+</sup>, 100); (neg) 703.1 ([M+HCOO]<sup>–</sup>, 100); 693.1 ([M+Cl]<sup>–</sup>, 20).

<sup>15</sup> (a) Milstein, D.; Stille, J. K. *J. Am. Chem. Soc.* **1979**, *101*, 4992–4998. (b) Farina, V.; Kapadia, S.; Krishnan, B.; Wang, C.; Liebeskind, L. S. *J. Org. Chem.* **1994**, *59*, 5905–5911.

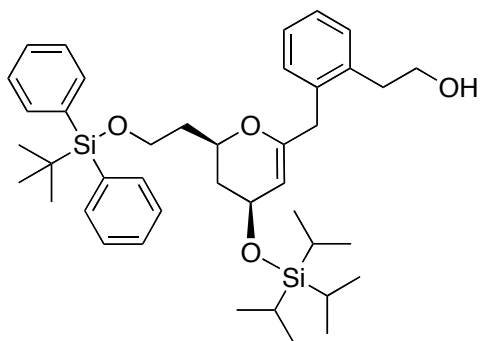

**(-)-2-(2-(((2R,4S)-2-(2-(tert-Butyl)diphenylsilyloxy)ethyl)-4-(triisopropylsilyloxy)-3,4-dihydro-2H-pyran-6-yl)methyl)phenyl)ethanol (2e).** Clear oil (50 mg, 65%). **TLC:**  $R_f$  0.38 (4:1 hexanes/EtOAc).  $[\alpha]_D^{19}$ :  $-19.1^\circ$  ( $c$  0.7,  $\text{CHCl}_3$ ). **IR** (NaCl, film): 3419 (O–H st), 3061, 2942, 2862, 1667, 1462, 1429, 1380, 1243, 1097 (C–O st), 882, 744, 700.  **$^1\text{H-NMR}$**  (500 MHz):  $\delta$  7.66–7.64 (m, 4H), 7.44–7.41 (m, 2H), 7.39–7.36 (m, 4H), 7.17–7.14 (m, 3H), 7.13–7.11 (m, 1H), 4.51–4.48 (m, 1H), 4.45 (d, 1H,  $J = 1.0$ ), 4.16 (dddd, 1H,  $J = 10.5, 8.2, 4.7, 2.3$ ), 3.79–3.68 (m, 4H), 3.34 (m, 2H), 2.89 (t, 2H,  $J = 6.9$ ), 2.08–2.03 (m, 1H), 1.92 (ddt, 1H,  $J = 13.9, 8.4, 5.5$ ), 1.76 (dddd, 1H,  $J = 13.9, 7.8, 6.1, 4.8$ ), 1.69–1.61 (m, 2H), 1.03 (m, 30H).  **$^{13}\text{C-NMR}$**  (125 MHz):  $\delta$  154.3, 137.1, 136.4, 135.7, 134.0, 130.7, 130.1, 129.7, 127.8, 126.8, 126.6, 102.9, 72.0, 64.1, 63.4, 60.3, 37.8 (2), 37.7, 36.3, 27.0, 19.4, 18.2, 12.4. **ESI-MS**  $m/z$  (rel int): (pos) 695.2 ( $[\text{M}+\text{Na}]^+$ , 100); (neg) 707.1 ( $[\text{M}+\text{Cl}]^-$ , 100).

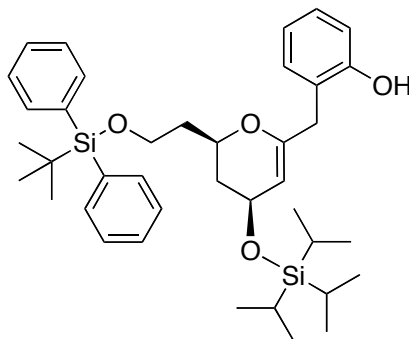

**(-)-2-(((2R,4S)-2-(2-(tert-Butyl)diphenylsilyloxy)ethyl)-4-(triisopropylsilyloxy)-3,4-dihydro-2H-pyran-6-yl)methyl)phenol (2g).** Clear oil (95 mg, 71%). **TLC:**  $R_f$  0.23 (10:1 hexanes/EtOAc).  $[\alpha]_D^{20}$ :  $-12.4^\circ$  ( $c$  1.9,  $\text{CHCl}_3$ ). **IR** (NaCl, film): 3415 (O–H st), 3066, 2949, 2864, 1673, 1589, 1463, 1428, 1381, 1237, 1099 (C–O st), 1005, 882, 745, 700.  **$^1\text{H-NMR}$**  (500 MHz):  $\delta$  7.69–7.66 (m, 4H), 7.46–7.38 (m, 6H), 7.17–7.13 (m, 1H), 7.09 (dd, 1H,  $J = 7.5, 1.5$ ), 6.89–6.84 (m, 2H), 6.83 (s, 1H), 4.77 (s, 1H), 4.52–4.49 (m, 1H), 4.29 (dddd, 1H,  $J = 10.2, 7.6, 5.4, 2.3$ ), 3.84–3.75 (m, 2H), 3.33 (m, 2H), 2.13–2.09 (m, 1H), 2.02 (m, 1H), 1.87–1.81 (m, 1H), 1.72 (ddd, 1H,  $J = 13.3, 10.6, 8.4$ ), 1.08–1.07 (m, 30H).  **$^{13}\text{C-NMR}$**  (125 MHz):  $\delta$  155.1, 152.9, 135.7, 133.9, 130.9, 129.8, 128.5, 127.8, 124.9, 120.8, 117.1, 103.2, 73.4, 63.8, 60.2, 37.6, 37.3, 37.0, 27.0, 19.4, 18.2, 12.4. **ESI-MS**  $m/z$  (rel int): (pos) 667.3 ( $[\text{M}+\text{Na}]^+$ , 100); (neg) 643.4 ( $[\text{M}-\text{H}]^-$ , 100).

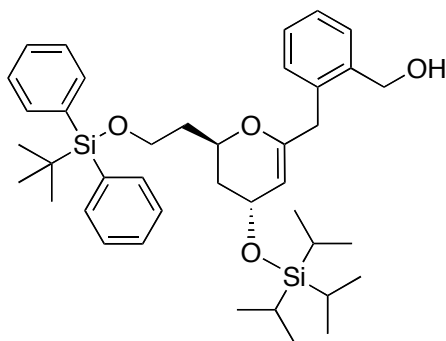

**(+)-(2-(((2R,4R)-2-(2-(tert-Butyldiphenylsilyloxy)ethyl)-4-(triisopropylsilyloxy)-3,4-dihydro-2H-pyran-6-yl)methyl)phenyl)methanol (2m).** Clear oil (263 mg, 88%). **TLC:**  $R_f$  0.21 (10:1 hexanes/EtOAc).  $[\alpha]_D^{20}$ : +80.2° ( $c$  1.6,  $\text{CHCl}_3$ ). **IR** (NaCl, film): 3422 (O–H st), 3066, 2943, 2864, 1663, 1463, 1428, 1385, 1324, 1098 (C–O st), 1005, 882, 739, 700.  **$^1\text{H-NMR}$**  (500 MHz):  $\delta$  7.67–7.64 (m, 4H), 7.44–7.34 (m, 7H), 7.24–7.19 (m, 3H), 4.70 (d, 1H,  $J = 4.8$ ), 4.68–4.60 (m, 2H), 4.28 (tdd, 1H,  $J = 9.7, 4.6, 2.3$ ), 4.22–4.20 (m, 1H), 3.81–3.72 (m, 2H), 3.41 (s, 2H), 2.16 (t, 1H,  $J = 6.1$ ), 1.87–1.74 (m, 3H), 1.54 (ddd, 1H,  $J = 13.7, 12.0, 3.7$ ), 1.03 (m, 30H).  **$^{13}\text{C-NMR}$**  (125 MHz):  $\delta$  155.7, 139.3, 136.4, 135.7, 134.1, 130.6, 129.7, 129.1, 128.1, 127.7, 127.1, 100.9, 69.4, 63.5, 61.3, 60.2, 38.1, 37.9, 37.4, 36.0, 27.0, 19.3, 18.3, 12.5. **ESI-MS**  $m/z$  (rel int): (pos) 681.1 ( $[\text{M}+\text{Na}]^+$ , 100).

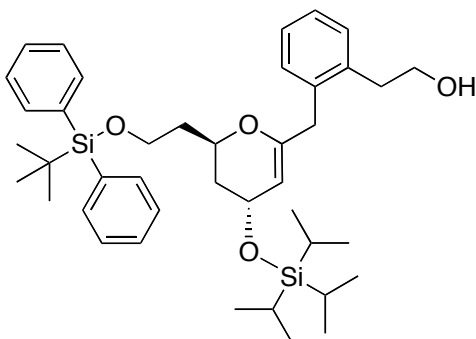

**(+)-2-(2-(((2R,4R)-2-(2-(tert-Butyldiphenylsilyloxy)ethyl)-4-(triisopropylsilyloxy)-3,4-dihydro-2H-pyran-6-yl)methyl)phenyl)ethanol (2n).** Clear oil (160 mg, 62%). **TLC:**  $R_f$  0.17 (10:1 hexanes/EtOAc).  $[\alpha]_D^{18}$ : +77.9° ( $c$  1.8,  $\text{CHCl}_3$ ). **IR** (NaCl, film): 3378 (O–H st), 3065, 3022, 2945, 2864, 1626, 1464, 1427, 1384, 1326, 1245, 1097 (C–O st), 1006, 882, 740, 701.  **$^1\text{H-NMR}$**  (500 MHz):  $\delta$  7.69–7.67 (m, 4H), 7.45–7.42 (m, 2H), 7.40–7.37 (m, 4H), 7.20–7.11 (m, 4H), 4.60 (d, 1H,  $J = 4.7$ ), 4.30 (dddd, 1H,  $J = 12.0, 7.8, 4.4, 1.9$ ), 4.23–4.21 (m, 1H), 3.86–3.75 (m, 4H), 3.36 (t, 2H,  $J = 3.7$ ), 2.89 (t, 2H,  $J = 7.0$ ), 1.86–1.79 (m, 3H), 1.57 (ddd, 2H,  $J = 13.6, 12.0, 3.7$ ), 1.06–1.05 (m, 30H).  **$^{13}\text{C-NMR}$**  (125 MHz):  $\delta$  155.7, 137.0, 136.5, 135.7, 134.1, 130.6, 130.0, 129.7, 127.7, 126.8, 126.6, 100.9, 68.9, 63.4, 61.4, 60.3, 38.3, 38.0, 37.6, 36.2, 27.0, 19.3, 18.3, 12.5. **ESI-MS**  $m/z$  (rel int): (pos) 695.4 ( $[\text{M}+\text{Na}]^+$ , 100); (neg) 671.2 ( $[\text{M}-\text{H}]^-$ , 40).



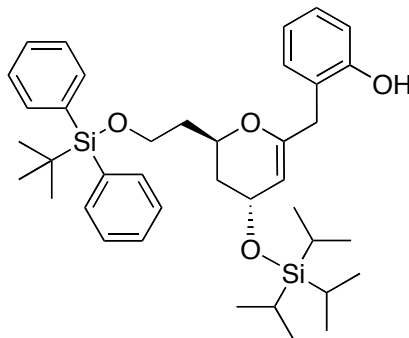

**(+)-2-(((2R,4R)-2-(2-(tert-butyl)diphenylsilyloxy)ethyl)-4-(triisopropylsilyloxy)-3,4-dihydro-2H-pyran-6-yl)methylphenol (2p).** Clear oil (175 mg, 66%). **TLC:**  $R_f$  0.52 (4:1 hexanes/EtOAc).  $[\alpha]_D^{20}$ : +80.9° (*c* 1.7, CHCl<sub>3</sub>). **IR** (NaCl, film): 3417 (O–H st), 3064, 3044, 2949, 2864, 1668, 1559, 1463, 1427, 1384, 1360, 1240, 1100 (C–O st), 1004, 883, 743, 700. **<sup>1</sup>H-NMR** (500 MHz): δ 7.70–7.67 (m, 4H), 7.45–7.38 (m, 6H), 7.14 (td, 1H, *J* = 7.7, 1.3), 7.08 (dd, 1H, *J* = 7.5, 1.4), 6.88–6.83 (m, 2H), 6.79 (s, 1H), 4.92 (d, 1H, *J* = 5.0), 4.43 (tdd, 1H, *J* = 9.6, 4.6, 2.3), 4.25–4.23 (m, 1H), 3.89–3.80 (m, 2H), 3.34 (m, 2H), 1.93 (ddt, 1H, *J* = 13.8, 8.0, 5.5), 1.88–1.81 (m, 2H), 1.59 (ddd, 1H, *J* = 13.7, 12.1, 3.6), 1.06 (m, 30H). **<sup>13</sup>C-NMR** (125 MHz): δ 155.1, 154.5, 135.7, 134.0, 133.9, 129.7, 128.4, 127.8, 124.9, 120.7, 117.1, 100.9, 70.2, 61.1, 60.0, 38.1, 37.7, 37.2, 26.7, 19.3, 18.3, 12.5. **ESI-MS** *m/z* (rel int): (pos) 667.2 ([M+Na]<sup>+</sup>, 100); (neg) 643.2 ([M-H]<sup>-</sup>, 100).

### C. GENERAL PROCEDURE FOR *B*-ALKYL SUZUKI–MIYaura COUPLING OF STYRENES AND ALLYL BENZENES (*n* = 2,3) (2f,h,i,o,q,r)

In a flame-dried 10 mL round bottom flask equipped with a magnetic stir bar, septum and argon inlet needle, the appropriate styrene or allyl benzene sidechain **S1f,h,i** (1.5 equiv) was dissolved in anhyd THF (0.1 M). A freshly prepared solution of 9-BBN (0.5 M in THF, 3.0 equiv) was added dropwise at rt. After 3 h, 1 N aq NaOH (3.0 equiv) was added, and the reaction was stirred for an additional 30 min at rt. In a separate flask, the C1-iodoglycal **S4** (1.0 equiv), prepared as previously described,<sup>13</sup> was dissolved in 3:1 THF/water (0.1 M), and solid Pd(dppf)Cl<sub>2</sub> (0.2 equiv) was added. The boron ‘ate’ complex was added to the solution of C1-iodoglycal via syringe. The reaction was stirred for 1 h at rt, diluted with pentane, filtered through celite/silica (1:1), washed with 1 N aq NaOH, H<sub>2</sub>O, and brine, then dried (MgSO<sub>4</sub>), filtered, and concentrated by rotary evaporation. Purification by silica flash chromatography yielded the *O*-acetyl C1-alkyl glycols **S3f,h,i,o,q,r**. These glycols were then dissolved in 1:1 THF/MeOH (0.1 M) and K<sub>2</sub>CO<sub>3</sub> (2.0 equiv) was added. After stirring for 12 h, the mixture was diluted with Et<sub>2</sub>O, washed with satd aq NaHCO<sub>3</sub>, dried (Na<sub>2</sub>SO<sub>4</sub>), and concentrated by rotary evaporation. Purification by silica flash chromatography (20:1–10:1 hexanes/EtOAc with 1% Et<sub>3</sub>N) afforded the free alcohols **2f,h,i,o,q,r**.

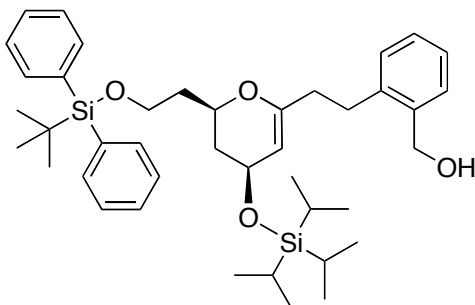

**(-)-(2-(2-((2R,4S)-2-(2-(tert-Butyldiphenylsilyloxy)ethyl)-4-(triisopropylsilyloxy)-3,4-dihydro-2H-pyran-6-yl)ethyl)phenyl)methanol (2f).** Clear oil (90 mg, 74%). **TLC:**  $R_f$  0.45 (4:1 hexanes/EtOAc).  $[\alpha]_D^{19}$ :  $-6.9^\circ$  ( $c$  1.7,  $\text{CHCl}_3$ ). **IR** (NaCl, film): 3321 (O–H st), 3068, 3022, 2939, 2864, 1669, 1464, 1428, 1385, 1362, 1104 (C–O st), 1087, 1005, 884, 741, 702.  **$^1\text{H-NMR}$**  (500 MHz):  $\delta$  7.71–7.69 (m, 4H), 7.45–7.37 (m, 7H), 7.24–7.20 (m, 2H), 7.17 (td, 1H,  $J = 6.3, 1.7$ ), 4.67 (app qd, 2H,  $J = 10.9, 5.5$ ), 4.53–4.50 (m, 2H), 4.18 (dddd, 1H,  $J = 10.5, 7.8, 5.0, 2.4$ ), 3.87 (ddd, 1H,  $J = 10.2, 7.6, 5.6$ ), 3.80 (dt, 1H,  $J = 10.6, 5.4$ ), 2.82 (m, 2H), 2.29–2.26 (m, 2H), 2.08 (dd, 1H,  $J = 13.1, 6.2$ ), 2.02–1.95 (m, 1H), 1.83 (m, 2H), 1.72–1.65 (m, 1H), 1.11–1.05 (m, 30H).  **$^{13}\text{C-NMR}$**  (125 MHz):  $\delta$  154.3, 139.7, 138.8, 135.7, 134.0, 129.7, 129.6, 128.2, 127.9, 127.8, 126.4, 101.8, 71.7, 64.2, 62.9, 60.4, 38.0, 37.9, 35.9, 29.9, 27.0, 19.4, 18.2, 12.4. **ESI-MS**  $m/z$  (rel int): (pos) 695.1 ( $[\text{M}+\text{Na}]^+$ , 100); (neg) 707.3 ( $[\text{M}+\text{Cl}]^-$ , 100).

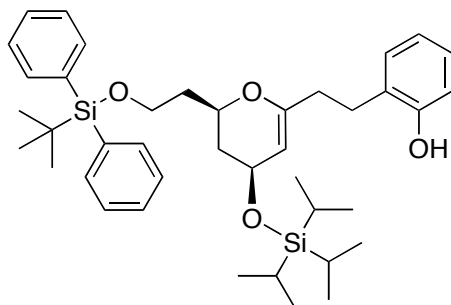

**(-)-2-(2-((2R,4S)-2-(2-(tert-Butyldiphenylsilyloxy)ethyl)-4-(triisopropylsilyloxy)-3,4-dihydro-2H-pyran-6-yl)ethyl)phenol (2h).** Clear oil (180 mg, 55%). **TLC:**  $R_f$  0.27 (10:1 hexanes/EtOAc).  $[\alpha]_D^{18}$ :  $-10.3^\circ$  ( $c$  6.0,  $\text{CHCl}_3$ ). **IR** (NaCl, film): 3417 (O–H st), 3065, 3044, 2949, 2863, 1669, 1461, 1431, 1382, 1355, 1336, 1240, 1100 (C–O st), 1004, 885, 746, 700.  **$^1\text{H-NMR}$**  (500 MHz):  $\delta$  7.73–7.70 (m, 4H), 7.44–7.38 (m, 6H), 7.10–7.06 (m, 2H), 6.84 (t, 1H,  $J = 7.4$ ), 6.77 (d, 1H,  $J = 8.5$ ), 4.56 (s, 1H), 4.51–4.48 (m, 1H), 4.26 (dddd, 1H,  $J = 10.3, 7.7, 5.0, 2.5$ ), 3.89 (ddd, 1H,  $J = 10.3, 7.6, 5.4$ ), 3.82 (dt, 1H,  $J = 10.6, 5.4$ ), 2.77 (t, 2H,  $J = 7.4$ ), 2.32 (ddd, 2H,  $J = 6.7, 7.8, 6.4$ ), 2.12–2.01 (m, 2H), 1.86 (ddt, 1H,  $J = 13.5, 7.8, 5.6$ ), 1.71 (ddd, 1H,  $J = 13.1, 10.4, 8.3$ ), 1.10–1.06 (m, 30H).  **$^{13}\text{C-NMR}$**  (125 MHz):  $\delta$  154.2, 153.7, 135.7, 134.0, 130.4, 129.7, 127.8, 127.7, 127.5, 120.5, 115.8, 102.5, 72.1, 63.9, 60.4, 46.0, 37.7, 34.7, 27.5, 27.0, 19.4, 18.2, 12.4, 11.0. **ESI-MS**  $m/z$  (rel int): (pos) 681.5 ( $[\text{M}+\text{Na}]^+$ , 100); (neg) 657.5 ( $[\text{M}+\text{Cl}]^-$ , 100).

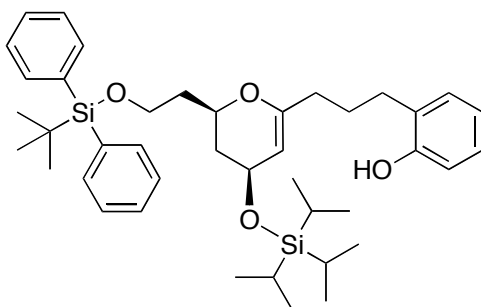

**(-)-2-(3-((2R,4S)-2-(2-(tert-Butyldiphenylsilyloxy)ethyl)-4-(triisopropylsilyloxy)-3,4-dihydro-2H-pyran-6-yl)propyl)phenol (2i).** Clear oil (47 mg, 77%). TLC:  $R_f$  0.20 (15:1 hexanes/EtOAc).  $[\alpha]_D^{19}$ :  $-6.7^\circ$  ( $c$  1.8,  $\text{CHCl}_3$ ). IR (NaCl, film): 3429 (O–H st), 3064, 2940, 2863, 1668, 1460, 1380, 1340, 1243, 1095 (C–O st), 1006, 884, 747, 699.  $^1\text{H-NMR}$  (500 MHz,  $\text{CD}_3\text{CN}$ ):  $\delta$  7.56–7.54 (m, 4H), 7.33–7.30 (m, 2H), 7.28–7.25 (m, 4H), 6.94–6.89 (m, 2H), 6.66–6.62 (m, 3H), 4.45 (d, 1H,  $J = 1.0$ ), 4.43–4.40 (m, 1H), 4.06 (dddd, 1H,  $J = 10.3, 8.0, 4.7, 2.4$ ), 3.72 (ddd, 1H,  $J = 10.2, 7.8, 5.4$ ), 3.66 (dt, 1H,  $J = 10.3, 5.7$ ), 2.43 (dd, 2H,  $J = 8.4, 6.9$ ), 1.97 (dddd, 1H,  $J = 13.1, 6.4, 2.3, 1.4$ ), 1.87 (t, 2H,  $J = 7.6$ ), 1.85–1.79 (m, 1H), 1.71 (dddd, 1H,  $J = 14.0, 7.8, 6.1, 4.8$ ), 1.60–1.53 (m, 2H), 1.46 (ddd, 1H,  $J = 13.2, 10.3, 8.0$ ), 0.96–0.90 (m, 30H).  $^{13}\text{C-NMR}$  (125 MHz,  $\text{CD}_3\text{CN}$ ):  $\delta$  155.6, 136.3, 134.7, 131.2, 130.7, 129.4, 129.3, 128.7, 127.9, 120.7, 115.9, 102.2, 72.4, 64.9, 61.2, 38.6, 38.3, 34.3, 30.1, 27.8, 27.2, 19.8, 18.5, 13.1. ESI-MS  $m/z$  (rel int): (pos) 695.2 ( $[\text{M}+\text{Na}]^+$ , 40) 711.2 ( $[\text{M}+\text{K}]^+$ , 100); (neg) 717.3 ( $[\text{M}+\text{HCOO}]^-$ , 100).

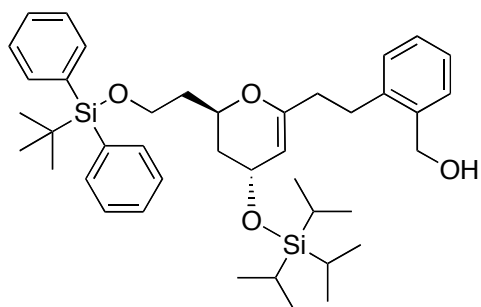

**(+)-2-(2-((2R,4R)-2-(2-(tert-Butyldiphenylsilyloxy)ethyl)-4-(triisopropylsilyloxy)-3,4-dihydro-2H-pyran-6-yl)ethyl)phenyl)ethanol (2o).** Clear oil (92 mg, 57%). TLC:  $R_f$  0.26 (10:1 hexanes/EtOAc).  $[\alpha]_D^{19}$ :  $+70.7^\circ$  ( $c$  3.1,  $\text{CHCl}_3$ ). IR (NaCl, film): 3412 (O–H st), 3063, 3025, 2947, 2865, 1664, 1463, 1428, 1386, 1355, 1100 (C–O st), 1003, 819, 742, 699.  $^1\text{H-NMR}$  (500 MHz):  $\delta$  7.73–7.71 (m, 4H), 7.45–7.36 (m, 7H), 7.20 (m, 3H), 4.66 (m, 3H), 4.29 (dddd, 1H,  $J = 12.0, 7.8, 4.4, 1.8$ ), 4.21 (s, 1H), 3.91 (ddd, 1H,  $J = 10.2, 7.9, 5.8$ ), 3.84 (dt, 1H,  $J = 10.5, 5.4$ ), 2.89–2.78 (m, 2H), 2.36–2.26 (m, 2H), 1.92–1.77 (m, 4H), 1.58–1.52 (m, 1H), 1.08 (m, 30H).  $^{13}\text{C-NMR}$  (125 MHz):  $\delta$  155.6, 139.7, 138.7, 135.7, 134.1, 134.0, 129.7, 128.4, 127.9, 127.8, 126.4, 99.8, 68.6, 63.0, 61.4, 60.3, 38.4, 38.1, 36.1, 29.9, 27.0, 19.3, 18.3, 12.5. ESI-MS  $m/z$  (rel int): (pos) 695.3 ( $[\text{M}+\text{Na}]^+$ , 100).

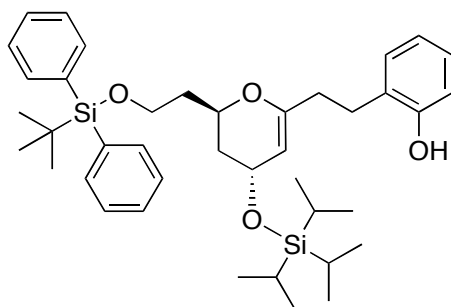

**(+)-2-(2-((2R,4R)-2-(2-(tert-Butyldiphenylsilyloxy)ethyl)-4-(triisopropylsilyloxy)-3,4-dihydro-2H-pyran-6-yl)ethyl)phenol (2q).** Clear oil (98 mg, 62%). TLC:  $R_f$  0.24 (10:1 hexanes/EtOAc).  $[\alpha]_D^{20}$ : +78.3° ( $c$  1.3,  $\text{CHCl}_3$ ). IR (NaCl, film): 3420 (O–H st), 3065, 3044, 2948, 2864, 1666, 1462, 1429, 1385, 1337, 1099 (C–O st), 1002, 856, 744, 700.  $^1\text{H-NMR}$  (500 MHz):  $\delta$  7.71–7.69 (m, 4H), 7.44–7.36 (m, 6H), 7.08–7.05 (m, 2H), 6.83 (t, 1H,  $J = 7.4$ ), 6.77 (d, 1H,  $J = 8.2$ ), 5.57–5.56 (brs, 1H), 4.69 (d, 1H,  $J = 5.2$ ), 4.37–4.32 (m, 1H), 4.16 (s, 1H), 3.93 (ddd, 1H,  $J = 10.2, 8.2, 5.5$ ), 3.84 (dt, 1H,  $J = 10.5, 5.3$ ), 2.81 (dt, 1H,  $J = 14.5, 7.4$ ), 2.71 (dt, 1H,  $J = 13.9, 6.8$ ), 2.43 (dt, 1H,  $J = 13.8, 6.8$ ), 2.26 (dt, 1H,  $J = 14.5, 7.5$ ), 1.96–1.85 (m, 2H), 1.81 (dd, 1H,  $J = 13.7, 1.5$ ), 1.61–1.55 (m, 1H), 1.07–1.05 (m, 30H).  $^{13}\text{C-NMR}$  (125 MHz):  $\delta$  154.7, 154.3, 135.7, 134.0, 130.5, 129.7, 127.8, 127.6, 127.4, 120.7, 115.9, 101.2, 69.1, 61.2, 60.2, 38.3, 38.0, 35.0, 27.1, 27.0, 19.4, 18.3, 12.5. ESI-MS  $m/z$  (rel int): (pos) 681.4 ( $[\text{M}+\text{Na}]^+$ , 100); (neg) 657.3 ( $[\text{M}-\text{H}]^-$ , 100).

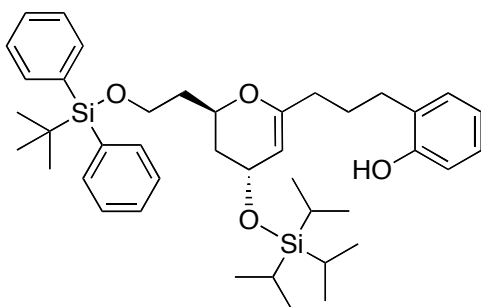

**(+)-2-(3-((2R,4R)-2-(2-(tert-Butyldiphenylsilyloxy)ethyl)-4-(triisopropylsilyloxy)-3,4-dihydro-2H-pyran-6-yl)propyl)phenol (2r).** Clear oil (82 mg, 82%). TLC:  $R_f$  0.55 (4:1 hexanes/EtOAc).  $[\alpha]_D^{20}$ : +65.2° ( $c$  2.7,  $\text{CHCl}_3$ ). IR (NaCl, film): 3412 (O–H st), 3065, 3043, 2945, 2863, 1662, 1461, 1429, 1385, 1352, 1246, 1100 (C–O st), 1001, 882, 744, 700.  $^1\text{H-NMR}$  (500 MHz):  $\delta$  7.72–7.70 (m, 4H), 7.45–7.36 (m, 6H), 7.11–7.07 (m, 2H), 6.86 (td, 1H,  $J = 7.4, 1.1$ ), 6.75 (dd, 1H,  $J = 7.9, 0.8$ ), 5.13–5.11 (br s, 1H), 4.78 (d, 1H,  $J = 5.1$ ), 4.34 (dddd, 1H,  $J = 11.9, 7.8, 4.3, 1.6$ ), 4.27–4.26 (m, 1H), 3.93 (ddd, 1H,  $J = 10.3, 8.1, 5.5$ ), 3.85 (dt, 1H,  $J = 10.5, 5.4$ ), 2.61 (td,  $J = 7.6, 2.6, 2\text{H}$ ), 2.10 (d,  $J = 14.1, 2\text{H}$ ), 1.96–1.77 (m, 5H), 1.59 (ddd, 1H,  $J = 13.6, 12.0, 3.7$ ), 1.10–1.07 (m, 30H).  $^{13}\text{C-NMR}$  (125 MHz):  $\delta$  156.3, 153.9, 135.7, 134.1, 130.4, 129.7, 128.2, 127.7, 127.3, 120.7, 115.7, 100.1, 68.9, 61.4, 60.3, 38.3, 38.2, 33.4, 29.2, 27.3, 27.0, 19.3, 18.3, 12.6. ESI-MS  $m/z$  (rel int): (pos) 695.3 ( $[\text{M}+\text{Na}]^+$ , 100); (neg) 671.3 ( $[\text{M}-\text{H}]^-$ , 100).

#### IV. SPIROCYCLIZATION WITH RETENTION OF CONFIGURATION (Ti[Oi-Pr]<sub>4</sub>) (4a–r)

##### GENERAL PROCEDURE FOR EPOXIDATION AND Ti(Oi-Pr)<sub>4</sub>-MEDIATED SPIROCYCLIZATION<sup>16</sup>

The glycol alcohol **2a–r** (1.0 equiv) was dissolved in CH<sub>2</sub>Cl<sub>2</sub> (final ratio 1:1 acetone/CH<sub>2</sub>Cl<sub>2</sub>) and cooled to –78 °C. DMDO (0.09 M in acetone, 1.2 equiv) was added via syringe, and the mixture was stirred at –78 °C. After 10 min, Ti(Oi-Pr)<sub>4</sub> (2.0 equiv) was added via syringe. The reaction mixture was then warmed immediately to 0 °C and stirred for 1 h. The cold reaction mixture was quenched with satd aq NaHCO<sub>3</sub>. The aq layer was separated and extracted with Et<sub>2</sub>O, and the combined extracts were washed with H<sub>2</sub>O and brine, dried (Na<sub>2</sub>SO<sub>4</sub>), filtered, and concentrated by rotary evaporation. Silica flash chromatography provided the ‘retention’ spiroketals **4a–r**.

<sup>1</sup>H-NMR resonances were assigned based on COSY analysis of purified products. The ‘retention’ spiroketals **4** and ‘inversion’ spiroketals **5** could be readily distinguished by examination of diagnostic <sup>1</sup>H-NMR peaks: C5-H (*threo*: δ 3.46–4.22; δ **4** > δ **5**) or (*erythro*: δ 3.88–4.73; δ **5** > δ **4**). Conformational assignments were based on analyses of NOESY spectra and/or coupling constants.<sup>17</sup> *J* values were determined by <sup>1</sup>H-NMR, except for compound **4j**, where a *J*-resolve experiment was used. The <sup>4</sup>C<sub>1</sub> and <sup>1</sup>C<sub>4</sub> chair conformers could be distinguished based on *J* values: <sup>4</sup>C<sub>1</sub> chair conformation (*threo*: *J*<sub>23</sub> > 7.0 and *J*<sub>54ax</sub> > 7.0; *erythro*: *J*<sub>23</sub> < 7.0 and *J*<sub>54ax</sub> > 7.0) or <sup>1</sup>C<sub>4</sub> chair conformation (*erythro*: *J*<sub>23</sub> > 7.0 and *J*<sub>54ax</sub> < 7.0).

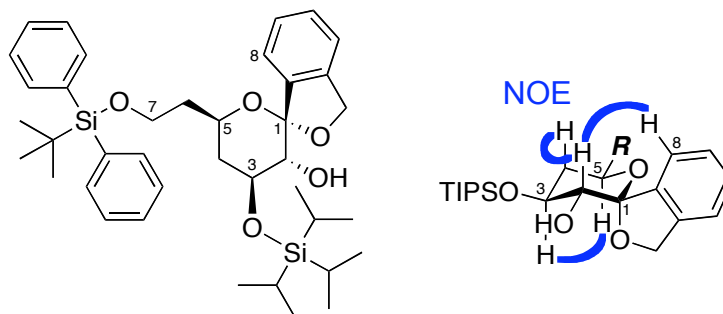

**(+)-(1S,3'R,4'S,6'R)-6'-(2-(tert-Butyldiphenylsilyloxy)ethyl)-4'-(triisopropylsilyloxy)-3',4',5',6'-tetrahydro-3H-spiro[isobenzofuran-1,2'-pyran]-3'-ol (4a)**. Clear oil (34 mg, 81%). **TLC**: *R<sub>f</sub>* 0.58 (4:1 hexanes/EtOAc). [ $\alpha$ ]<sub>D</sub><sup>19</sup>: +23.4° (*c* 1.7, CHCl<sub>3</sub>). **IR** (NaCl, film): 3574 (O–H st), 3061, 3044, 2937, 2864, 1464, 1430, 1386, 1251, 1103 (C–O st), 1008, 881, 821, 746, 698. **<sup>1</sup>H-NMR** (500 MHz): δ 7.65–7.61 (m, 4H), 7.41–7.33 (m, 7H), 7.29–7.26 (m, 3H), 5.15 (d, 1H, *J* = 12.6), 5.10 (d, 1H, *J* = 12.6), 4.32 (dddd, 1H, *J* = 12.1, 7.2, 5.0, 2.1), 4.22 (ddd, 1H, *J* = 11.1, 8.9, 5.0), 3.83 (dd, 1H, *J* = 8.9, 6.4), 3.74 (ddd, 1H, *J* = 10.2, 7.8, 5.2), 3.67 (dt, 1H, *J* = 10.5, 5.4), 2.10 (ddd, 1H, *J* = 12.8, 5.0, 2.0), 1.94 (d, 1H, *J* = 6.4), 1.81–1.70 (m, 2H), 1.65 (dd, *J* = 24.0, 11.9, 1H), 1.11–1.04 (m, 30H). **<sup>13</sup>C-NMR** (125 MHz): δ 140.3, 139.1, 135.7, 134.1, 129.7, 129.2, 128.0, 127.7, 122.1, 121.1, 110.6, 76.8, 72.6, 71.7, 67.4, 60.3, 41.0, 38.4, 26.9, 19.3, 18.3, 12.7. **ESI-MS** *m/z* (rel int): (pos) 683.4 ([M+Na]<sup>+</sup>, 100); (neg) 659.5 ([M–H]<sup>–</sup>, 100).

<sup>16</sup> Moilanen, S. B.; Potuzak, J. S.; Tan, D. S. *J. Am. Chem. Soc.* **2006**, *128*, 1792–1793.

<sup>17</sup> Karplus, M. *J. Chem. Phys.* **1959**, *30*, 11–15.

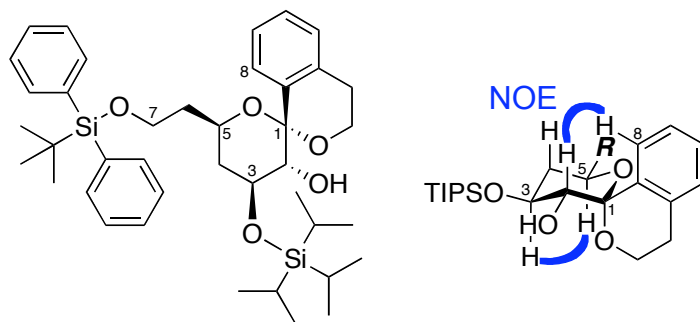

**(+)-(1*S*,3'*R*,4'*S*,6'*R*)-6'-(2-(*tert*-Butyldiphenylsilyloxy)ethyl)-4'-(triisopropylsilyloxy)-3',4',5',6'-tetrahydrospiro[isochroman-1,2'-pyran]-3'-ol (4b).** Clear oil (40 mg, 91%). **TLC:**  $R_f$  0.49 (5:1 hexanes/EtOAc).  $[\alpha]_D^{19}$ : +7.1° ( $c$  2.0, CHCl<sub>3</sub>). **IR** (NaCl, film): 3573 (O–H st), 3064, 3040, 2938, 2864, 1463, 1429, 1385, 1251, 1105 (C–O st), 1083, 1033, 1002, 884, 744, 698. **<sup>1</sup>H-NMR** (500 MHz):  $\delta$  7.65 (dt, 4H,  $J$  = 8.0, 1.3), 7.43–7.39 (m, 3H), 7.37–7.32 (m, 4H), 7.28–7.22 (m, 2H), 7.11 (d, 1H,  $J$  = 6.7), 4.22–4.17 (m, 2H), 4.00 (ddd, 1H,  $J$  = 12.5, 11.0, 2.8), 3.94 (dt, 1H,  $J$  = 5.9, 5.1), 3.83–3.71 (m, 3H), 3.12 (ddd, 1H,  $J$  = 16.9, 12.0, 5.5), 2.54 (dd, 1H,  $J$  = 16.4, 2.2), 2.08 (ddd, 1H,  $J$  = 12.8, 5.0, 2.1), 1.97 (d, 1H,  $J$  = 7.3), 1.84–1.78 (m, 1H), 1.71 (ddt, 1H,  $J$  = 13.5, 7.9, 5.5), 1.62 (q, 1H,  $J$  = 12.0), 1.14–1.05 (m, 30H). **<sup>13</sup>C-NMR** (125 MHz):  $\delta$  135.7, 135.5, 135.1, 134.1, 129.7, 128.6, 128.1, 127.7, 126.9, 126.5, 99.0, 78.4, 71.4, 65.8, 60.6, 58.6, 41.0, 38.4, 28.7, 27.0, 19.4, 18.3, 12.7. **ESI-MS**  $m/z$  (rel int): (pos) 697.3 ([M+Na]<sup>+</sup>, 100); (neg) 673.5.0 ([M–H]<sup>–</sup>, 100).

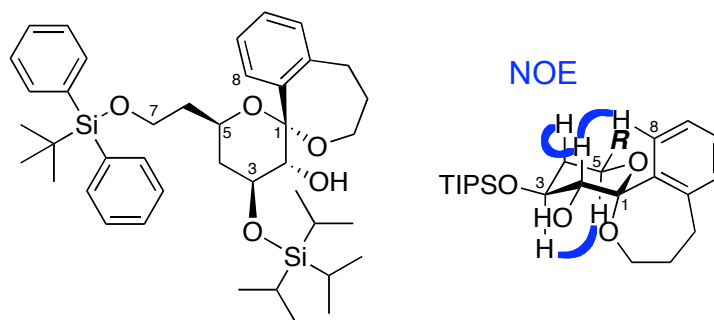

**(+)-(1*S*,3'*R*,4'*S*,6'*R*)-6'-(2-(*tert*-Butyldiphenylsilyloxy)ethyl)-4'-(triisopropylsilyloxy)-3',4',5',6'-hexahydro-3*H*-spiro[benzo[*c*]oxepine-1,2'-pyran]-3'-ol (4c).** Clear oil (19 mg, 90%). **TLC:**  $R_f$  0.24 (10:1 hexanes/EtOAc).  $[\alpha]_D^{18}$ : +37.1° ( $c$  2.8, CHCl<sub>3</sub>). **IR** (NaCl, film): 3589 (O–H st), 3063, 3020, 2946, 2864, 1462, 1437, 1386, 1297, 1102 (C–O st), 1020, 882, 754, 698. **<sup>1</sup>H-NMR** (500 MHz):  $\delta$  7.68–7.66 (m, 4H), 7.48 (dd, 1H,  $J$  = 7.6, 1.6), 7.45–7.34 (m, 6H), 7.27–7.21 (m, 2H), 7.09 (dd, 1H,  $J$  = 7.2, 1.5), 4.22 (ddd, 1H,  $J$  = 11.0, 8.8, 5.0), 4.14 (tdd, 1H,  $J$  = 9.6, 4.5, 2.3), 3.86–3.77 (m, 3H), 3.69 (dd, 1H,  $J$  = 12.6, 8.3), 3.62 (dt, 1H,  $J$  = 13.2, 6.6), 3.42 (dd, 1H,  $J$  = 8.8, 5.7), 2.49–2.46 (m, 1H), 2.26 (dddd, 1H,  $J$  = 11.4, 6.6, 4.7, 1.7), 2.13 (d, 1H,  $J$  = 5.7), 2.08 (ddd, 1H,  $J$  = 12.7, 5.0, 2.1), 1.92–1.86 (m, 1H), 1.81–1.67 (m, 2H), 1.60 (q, 1H,  $J$  = 11.9), 1.15–1.05 (m, 30H). **<sup>13</sup>C-NMR** (125 MHz):  $\delta$  139.9, 138.9, 135.7, 134.1, 129.7, 129.6, 128.7, 128.4, 127.7, 126.9, 105.6, 82.2, 71.2, 65.3, 60.8, 58.9, 41.0, 38.6, 30.4, 29.0, 27.0, 19.3, 18.3, 12.7. **ESI-MS**  $m/z$  (rel int): (pos) 711.4 ([M+Na]<sup>+</sup>, 100); (neg) 687.3 ([M–H]<sup>–</sup>, 100).

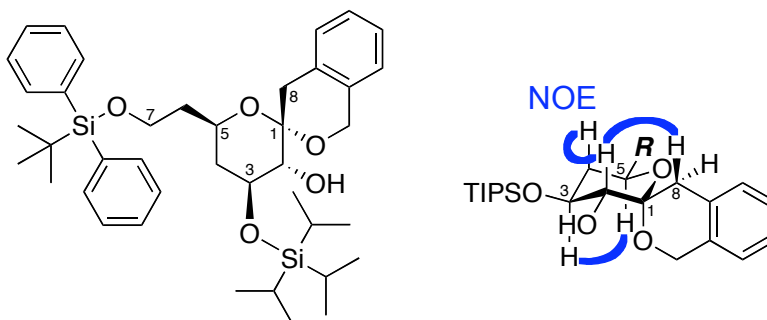

**(+)-(2'*S*,3'*R*,4'*S*,6'*R*)-6'-(2-(*tert*-Butyldiphenylsilyloxy)ethyl)-4'-(triisopropylsilyloxy)-3',4',5',6'-tetrahydrospiro[isochroman-3,2'-pyran]-3'-ol (4d).** Clear oil (24 mg, 86%). **TLC:**  $R_f$  0.63 (4:1 hexanes/EtOAc).  $[\alpha]_D^{20}$ : +44.8° ( $c$  1.1, CHCl<sub>3</sub>). **IR** (NaCl, film): 3573 (O–H st), 3064, 3024, 2940, 2864, 1463, 1429, 1384, 1251, 1103 (C–O st), 881, 821, 778, 700. **<sup>1</sup>H-NMR** (500 MHz):  $\delta$  7.59 (dd, 4H,  $J$  = 22.3, 6.8), 7.43–7.38 (m, 2H), 7.33 (dt, 4H,  $J$  = 16.1, 7.8), 7.19–7.13 (m, 2H), 7.10 (d, 1H,  $J$  = 7.3), 6.91 (d, 1H,  $J$  = 7.3), 4.92 (d, 1H,  $J$  = 14.6), 4.67 (d, 1H,  $J$  = 14.6), 4.19 (ddd, 1H,  $J$  = 11.0, 8.8, 4.9), 4.13–4.08 (m, 1H), 3.72–3.67 (m, 1H), 3.55 (td, 2H,  $J$  = 11.0, 5.5), 3.35 (dd, 1H,  $J$  = 8.5, 7.0), 2.62 (d, 1H,  $J$  = 16.8), 2.23 (d, 1H,  $J$  = 6.8), 2.01 (ddd, 1H,  $J$  = 12.6, 4.8, 1.4), 1.64 (app q, 2H,  $J$  = 6.0), 1.51 (q, 1H,  $J$  = 12.0), 1.15–1.05 (m, 30H). **<sup>13</sup>C-NMR** (125 MHz):  $\delta$  135.6, 134.0, 133.1, 131.5, 129.7, 129.1, 127.8, 126.6, 125.7, 123.8, 98.2, 78.3, 71.1, 65.0, 61.8, 60.1, 40.9, 38.3, 34.3, 27.0, 19.3, 18.3, 12.8. **ESI-MS**  $m/z$  (rel int): (pos) 697.1 ([M+Na]<sup>+</sup>, 100); (neg) 719.3 ([M+HCOO]<sup>-</sup>, 100) 673.3.2 ([M–H]<sup>-</sup>, 30) 709.2 ([M+Cl]<sup>-</sup>, 25).

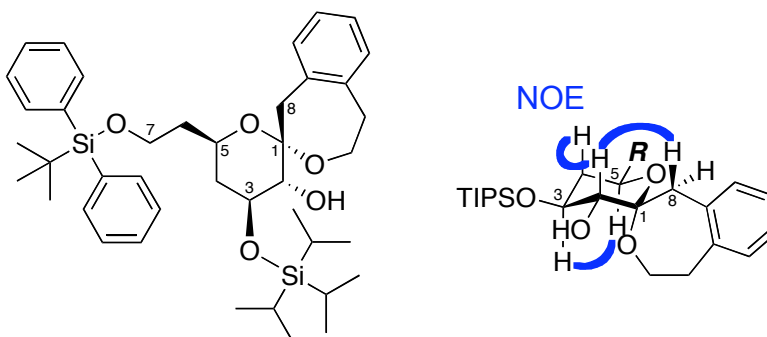

**(+)-(2*S*,3'*R*,4'*S*,6'*R*)-6'-(2-(*tert*-Butyldiphenylsilyloxy)ethyl)-4'-(triisopropylsilyloxy)-3',4,4',5,5',6'-hexahydro-1*H*-spiro[benzo[*d*]oxepine-2,2'-pyran]-3'-ol (4e).** Clear oil (27 mg, 99%). **TLC:**  $R_f$  0.58 (4:1 hexanes/EtOAc).  $[\alpha]_D^{20}$ : +31.8° ( $c$  1.8, CHCl<sub>3</sub>). **IR** (NaCl, film): 3573 (O–H st), 3064, 3023, 2939, 2864, 1463, 1430, 1384, 1253, 1102 (C–O st), 1075, 883, 746, 696. **<sup>1</sup>H-NMR** (500 MHz):  $\delta$  7.57 (dd, 2H,  $J$  = 8.0, 1.3), 7.51 (dd, 2H,  $J$  = 7.9, 1.3), 7.44–7.40 (m, 2H), 7.38–7.34 (m, 4H), 7.12–7.05 (m, 3H), 7.00 (d, 1H,  $J$  = 6.7), 4.05 (ddd, 1H,  $J$  = 11.0, 8.7, 5.0), 3.89–3.81 (m, 3H), 3.76 (d, 1H,  $J$  = 14.8), 3.40 (dd, 2H,  $J$  = 8.3, 5.1), 3.32 (dd, 1H,  $J$  = 8.6, 6.5), 3.30–3.26 (m, 1H), 2.82 (d, 1H,  $J$  = 14.8), 2.65 (dd, 1H,  $J$  = 15.3, 4.1), 2.33 (d, 1H,  $J$  = 6.5), 1.94–1.90 (m, 1H), 1.56–1.49 (m, 2H), 1.43 (q, 1H,  $J$  = 12.2), 1.13–1.08 (m, 21H), 0.99 (s, 9H). **<sup>13</sup>C-NMR** (125 MHz):  $\delta$  140.5, 136.9, 135.6, 134.1, 130.9, 129.7, 128.2, 127.7, 126.3, 126.2, 98.0, 81.3, 71.1, 64.3, 61.4, 60.1, 45.7, 40.9, 38.3, 38.1, 27.0, 19.3, 18.3, 12.8. **ESI-MS**  $m/z$  (rel int): (pos) 711.5 ([M+Na]<sup>+</sup>, 100); (neg) 687.3 ([M–H]<sup>-</sup>, 100).

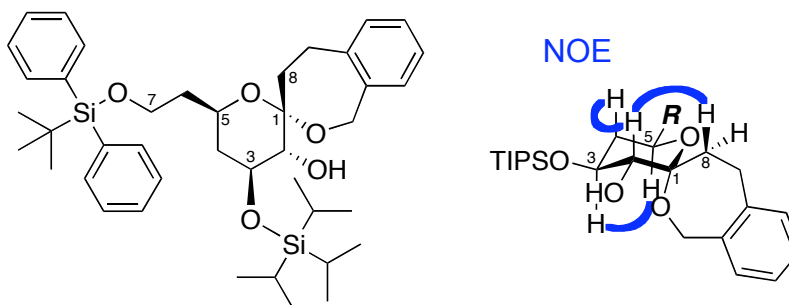

(+)-(2'*S*,3'*R*,4'*S*,6'*R*)-6'-(2-(*tert*-Butyldiphenylsilyloxy)ethyl)-4'-(triisopropylsilyloxy)-3',4',5',6'-hexahydro-1*H*-spiro[benzo[*c*]oxepine-3,2'-pyran]-3'-ol (**4f**). Clear oil (25 mg, 90%). **TLC**:  $R_f$  0.55 (4:1 hexanes/EtOAc).  $[\alpha]_D^{18}$ : +18.9° ( $c$  1.5, CHCl<sub>3</sub>). **IR** (NaCl, film): 3650 (O–H st), 3061, 3026, 2938, 2863, 1672, 1461, 1435, 1384, 1264, 1103 (C–O st), 1076, 1015, 884, 749, 697. **<sup>1</sup>H-NMR** (500 MHz):  $\delta$  7.64–7.59 (m, 4H), 7.41–7.38 (m, 1H), 7.35–7.32 (m, 3H), 7.25–7.22 (m, 2H), 7.20–7.17 (m, 1H), 7.15–7.12 (m, 3H), 5.07 (d, 1H,  $J$  = 13.4), 4.14 (d, 1H,  $J$  = 13.4), 4.04–3.98 (m, 2H), 3.93 (ddd, 1H,  $J$  = 10.2, 7.7, 5.7), 3.79 (dt, 1H,  $J$  = 10.3, 5.2), 3.25 (t, 1H,  $J$  = 13.6), 3.09 (t, 1H,  $J$  = 8.1), 2.57–2.53 (m, 1H), 2.25–2.20 (m, 1H), 2.02 (d, 1H,  $J$  = 7.6), 1.98 (ddd, 1H,  $J$  = 12.7, 5.0, 2.0), 1.84–1.76 (m, 3H), 1.45 (q, 1H,  $J$  = 12.0), 1.09–1.03 (m, 30H). **<sup>13</sup>C-NMR** (125 MHz):  $\delta$  143.1, 139.1, 135.7, 135.6, 133.8, 129.8, 128.6, 128.1, 127.8, 126.0, 101.1, 79.9, 71.1, 64.4, 63.6, 60.4, 40.9, 38.6, 35.6, 28.6, 27.0, 19.3, 18.3, 12.7. **ESI-MS**  $m/z$  (rel int): (pos) 711.1 ([M+Na]<sup>+</sup>, 100); (neg) 687.4 ([M–H]<sup>–</sup>, 100).

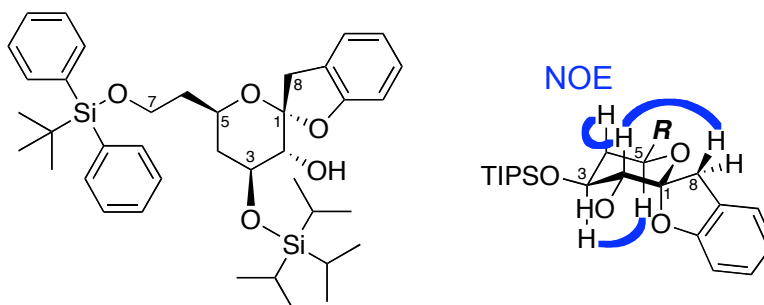

(+)-(2*R*,3'*R*,4'*S*,6'*R*)-6'-(2-(*tert*-Butyldiphenylsilyloxy)ethyl)-4'-(triisopropylsilyloxy)-3',4',5',6'-tetrahydro-3*H*-spiro[benzofuran-2,2'-pyran]-3'-ol (**4g**). Clear oil (20 mg, 98%). **TLC**:  $R_f$  0.23 (10:1 hexanes/EtOAc).  $[\alpha]_D^{19}$ : +47.05° ( $c$  0.7, CHCl<sub>3</sub>). **IR** (NaCl, film): 3582 (O–H st), 3063, 3046, 2938, 2863, 1598, 1471, 1428, 1387, 1237, 1103 (C–O st), 1003, 875, 745, 701. **<sup>1</sup>H-NMR** (500 MHz):  $\delta$  7.62 (dd, 2H,  $J$  = 8.0, 1.4), 7.53–7.51 (m, 2H), 7.43–7.39 (m, 1H), 7.36–7.33 (m, 3H), 7.23–7.19 (m, 3H), 7.12–7.09 (m, 1H), 6.91 (d, 1H,  $J$  = 7.4), 6.80 (d, 1H,  $J$  = 8.0), 4.37 (dtd, 1H,  $J$  = 12.1, 6.1, 1.9), 4.22 (ddd, 1H,  $J$  = 11.1, 8.9, 4.9), 3.69 (dt, 1H,  $J$  = 10.2, 6.5), 3.64–3.59 (m, 2H), 3.52 (dd, 1H,  $J$  = 8.9, 6.8), 3.02 (d, 1H,  $J$  = 16.3), 2.09 (ddd, 1H,  $J$  = 12.9, 4.9, 2.1), 2.02 (d, 1H,  $J$  = 6.8), 1.71 (app q, 2H,  $J$  = 6.1), 1.58 (q, 1H,  $J$  = 12.1), 1.11 (m, 21H), 0.99 (s, 9H). **<sup>13</sup>C-NMR** (125 MHz):  $\delta$  158.6, 135.6, 134.0, 133.7, 129.6, 127.9, 126.1, 124.9, 121.1, 111.3, 110.1, 76.9, 71.4, 66.8, 59.9, 40.7, 39.3, 38.2, 26.9, 19.3, 18.3, 12.8. **ESI-MS**  $m/z$  (rel int): (pos) 683.4 ([M+Na]<sup>+</sup>, 100); (neg) 659.4 ([M–H]<sup>–</sup>, 100).



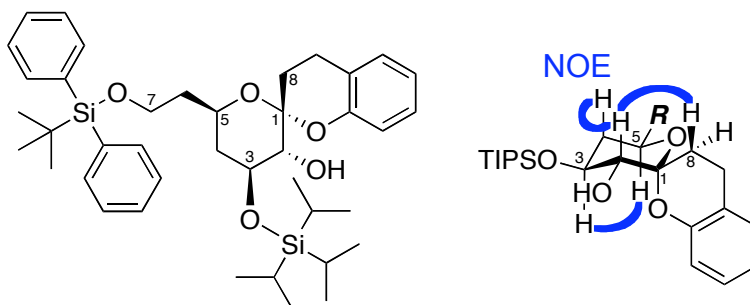

(+)-(2*R*,3'*R*,4'*S*,6'*R*)-6'-(2-(*tert*-Butyldiphenylsilyloxy)ethyl)-4'-(triisopropylsilyloxy)-3',4',5',6'-tetrahydrospiro[chroman-2,2'-pyran]-3'-ol (**4h**). Clear oil (40 mg, 88%). TLC:  $R_f$  0.33 (10:1 hexanes/EtOAc).  $[\alpha]_D^{19}$ : +51.3° (*c* 1.03 CHCl<sub>3</sub>). IR (NaCl, film): 3580 (O–H st), 3064, 2943, 2865, 1586, 1463, 1386, 1301, 1223, 1102 (C–O st), 990, 882, 820, 746, 698. <sup>1</sup>H-NMR (500 MHz): δ 7.55 (d, 2H, *J* = 7.7), 7.47 (d, 2H, *J* = 7.6), 7.40 (m, 2H), 7.33 (m, 4H), 7.05 (t, 2H, *J* = 7.7), 6.85 (dd, 2H, *J* = 17.3, 7.9), 4.33–4.28 (m, 1H), 4.06–4.01 (m, 1H), 3.55–3.47 (m, 2H), 3.35–3.33 (m, 1H), 2.94 (td, 1H, *J* = 14.8, 5.8), 2.61 (dd, 1H, *J* = 16.0, 5.7), 2.32 (ddd, 1H, *J* = 16.2, 10.9, 5.5), 2.11 (d, 1H, *J* = 6.9), 2.07–2.04 (m, 1H), 1.85 (dd, 1H, *J* = 13.4, 5.9), 1.71–1.58 (m, 2H), 1.52 (q, 1H, *J* = 12.1), 1.16–1.13 (m, 21H), 0.92 (s, 9H). <sup>13</sup>C-NMR (125 MHz): δ 151.9, 135.6, 134.0, 129.6, 129.1, 127.7, 127.2, 122.8, 121.1, 117.3, 98.8, 78.5, 70.9, 66.0, 60.3, 40.8, 38.3, 27.9, 26.9, 20.8, 19.2, 18.3, 12.8. ESI-MS *m/z* (rel int): (pos) 697.1 ([M+Na]<sup>+</sup>, 100); (neg) 673.3 ([M–H]<sup>–</sup>, 100).

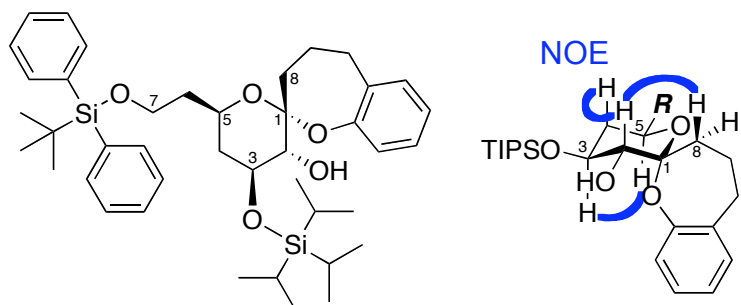

(+)-(2*R*,3'*R*,4'*S*,6'*R*)-6'-(2-(*tert*-Butyldiphenylsilyloxy)ethyl)-4'-(triisopropylsilyloxy)-3',4',4',5',5',6'-hexahydro-3*H*-spiro[benzo[*b*]oxepine-2,2'-pyran]-3'-ol (**4i**). Clear oil (53 mg, 96%). TLC:  $R_f$  0.41 (4:1 hexanes/EtOAc).  $[\alpha]_D^{20}$ : +45.1° (*c* 1.0, CHCl<sub>3</sub>). IR (NaCl, film): 3578 (O–H st), 3069, 3023, 2934, 2863, 1676, 1462, 1431, 1387, 1231, 1107 (C–O st), 1077, 883, 761, 702. <sup>1</sup>H-NMR (500 MHz): δ 7.57 (m, 4H), 7.42 (t, 2H, *J* = 7.3), 7.36 (m, 4H), 6.93 (t, 2H, *J* = 6.9), 6.87 (d, 1H, *J* = 7.8), 6.80 (t, 1H, *J* = 7.3), 4.28 (ddd, 1H, *J* = 11.1, 8.8, 4.7), 3.99–3.94 (m, 1H), 3.42 (dd, 1H, *J* = 16.7, 8.0), 3.28 (dd, 1H, *J* = 8.7, 6.6), 3.16 (dd, 1H, *J* = 15.2, 9.1), 2.75–2.65 (m, 2H), 2.35 (d, 1H, *J* = 6.5), 2.29 (ddd, 1H, *J* = 14.3, 9.3, 5.4), 1.99 (ddd, 1H, *J* = 12.6, 4.6, 1.6), 1.82 (dt, 1H, *J* = 14.2, 4.6), 1.74 (dt, 2H, *J* = 11.1, 5.6), 1.65 (td, 1H, *J* = 14.1, 8.1), 1.53–1.43 (m, 2H), 1.14 (m, 21H), 1.01 (s, 9H). <sup>13</sup>C-NMR (125 MHz): δ 152.9, 135.6, 134.7, 134.1, 129.9, 129.6, 127.7, 126.8, 123.5, 122.7, 102.1, 80.2, 71.2, 67.0, 60.8, 40.3, 38.3, 37.4, 33.5, 27.0, 20.1, 19.3, 18.4, 12.8. ESI-MS *m/z* (rel int): (pos) 711.3 ([M+Na]<sup>+</sup>, 100); (neg) 687.3 ([M–H]<sup>–</sup>, 100).

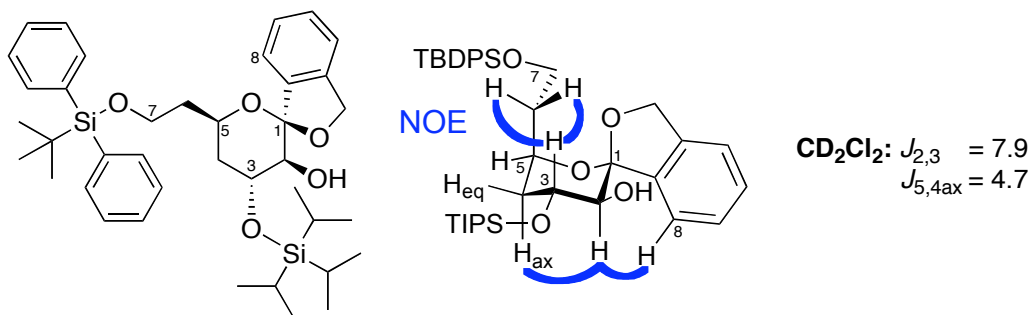

**(+)-(1R,3'S,4'R,6'R)-6'-(2-(tert-Butyldiphenylsilyloxy)ethyl)-4'-(triisopropylsilyloxy)-3',4',5',6'-tetrahydro-3H-spiro[isobenzofuran-1,2'-pyran]-3'-ol (4j).** Clear oil (17 mg, 85%). **TLC:**  $R_f$  0.23 (10:1 hexanes/EtOAc).  $[\alpha]_D^{19}$ :  $+4.0^\circ$  ( $c$  0.5,  $\text{CHCl}_3$ ). **IR** (NaCl, film): 3567 (O–H st), 3054, 2940, 2864, 1464, 1427, 1382, 1250, 1103 (C–O st), 1007, 882, 745, 698.  **$^1\text{H-NMR}$**  (500 MHz,  $\text{CD}_2\text{Cl}_2$ ):  $\delta$  7.62 (dd, 2H, Ar-H,  $J = 8.0, 1.4$ ), 7.56 (dd, 2H, Ar-H,  $J = 8.0, 1.4$ ), 7.43 (dd, 1H, C8-H,  $J = 6.6, 1.4$ ), 7.39–7.30 (m, 6H, Ar-H), 7.23–7.21 (m, 1H, Ar-H), 7.18–7.15 (m, 2H, Ar-H), 4.94–4.88 (m, 2H, C12-H), 4.38 (app dq, 1H, C5-H,  $J = 9.3, 4.7$ ), 4.27 (td, 1H, C3-H,  $J = 8.2, 5.8$ ), 3.79 (dd, 1H, C2-H,  $J = 7.9, 7.0$ ), 3.76 (dt, 1H, C7-H,  $J = 8.4, 3.3$ ), 3.68 (dt, 1H, C7-H,  $J = 10.3, 5.3$ ), 2.25 (ddt, 1H, C6-H,  $J = 17.7, 8.6, 4.2$ ), 2.05–2.02 (m, 2H, C4-H), 2.01 (d, 1H, C2-OH,  $J = 7.0$ ), 1.75 (ddt, 1H, C6-H,  $J = 13.6, 8.0, 5.5$ ), 1.11–1.07 (m, 21H, TIPS), 0.97 (s, 9H, *t*-Bu).  **$^1\text{H-NMR}$**  (500 MHz,  $\text{CDCl}_3$ ):  $\delta$  7.65–7.63 (m, 2H), 7.58–7.56 (m, 2H), 7.52 (dd, 1H,  $J = 6.0, 2.1$ ), 7.41–7.37 (m, 1H), 7.36–7.31 (m, 5H), 7.22–7.20 (m, 1H), 7.20–7.16 (m, 2H), 4.97 (d, 2H,  $J = 13.2$ ), 4.44 (app dq, 1H,  $J = 9.2, 4.6$ ), 4.33 (td, 1H,  $J = 8.3, 4.8$ ), 3.87 (dd, 1H,  $J = 7.8, 5.9$ ), 3.77 (ddd, 1H,  $J = 10.2, 8.0, 5.1$ ), 3.68 (dt, 1H,  $J = 10.4, 5.3$ ), 2.26 (ddt, 1H,  $J = 13.7, 9.4, 4.8$ ), 2.18 (d, 1H,  $J = 5.9$ ), 2.11–2.02 (m, 2H), 1.80 (ddt, 1H,  $J = 13.6, 8.0, 5.7$ ), 1.16–1.04 (m, 21H), 1.01–0.97 (s, 9H).  **$^{13}\text{C-NMR}$**  (125 MHz,  $\text{CDCl}_3$ ):  $\delta$  140.1, 139.5, 135.7, 134.0, 133.8, 129.6, 129.2, 127.9, 122.5, 121.0, 111.6, 76.3, 72.5, 70.1, 68.8, 60.9, 38.6, 37.6, 26.9, 19.3, 18.3, 12.6. **ESI-MS**  $m/z$  (rel int): (pos) 683.3.0 ( $[\text{M}+\text{Na}]^+$ , 100); (neg) 659.1.0 ( $[\text{M}-\text{H}]^-$ , 100).

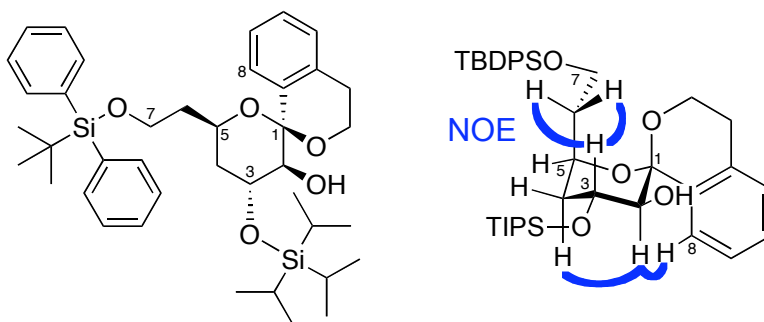

**(-)-(1R,3'S,4'R,6'R)-6'-(2-(tert-Butyldiphenylsilyloxy)ethyl)-4'-(triisopropylsilyloxy)-3',4',5',6'-tetrahydrospiro[isochroman-1,2'-pyran]-3'-ol (4k).** Clear oil (19 mg, 96%). **TLC:**  $R_f$  0.35 (4:1 hexanes/EtOAc).  $[\alpha]_D^{20}$ :  $-20.1^\circ$  ( $c$  0.3,  $\text{CHCl}_3$ ). **IR** (NaCl, film): 3571 (O–H st), 3068, 3048, 2934, 2862, 1463, 1427, 1384, 1251, 1108 (C–O st), 1077, 1032, 883, 745, 704.  **$^1\text{H-NMR}$**  (500 MHz,  $\text{C}_6\text{D}_6$ ):  $\delta$  7.80 (m, 4H), 7.40–7.38 (m, 1H), 7.23–7.20 (m, 4H), 7.09–7.05 (m, 4H), 6.84–6.82 (m, 1H), 4.60 (dtd, 1H,  $J = 8.7, 5.8, 3.1$ ), 4.42 (td, 1H,  $J = 8.8, 4.9$ ), 3.96 (ddd, 1H,  $J = 10.2, 8.0, 5.0$ ), 3.91 (t, 1H,  $J = 8.5$ ), 3.83 (dt, 1H,  $J = 10.4, 5.3$ ), 3.64 (ddd, 1H,  $J = 12.7, 10.6, 2.3$ ), 3.39 (dd, 1H,  $J = 10.8, 4.5$ ), 2.61 (ddd, 1H,  $J = 16.4, 12.1, 4.9$ ), 2.33 (ddt, 1H,  $J$

= 13.8, 8.7, 5.2), 2.16–2.06 (m, 2H), 1.97–1.90 (m, 2H), 1.87 (d, 1H,  $J = 8.7$ ), 1.21–1.17 (m, 30H).  $^{13}\text{C-NMR}$  (125 MHz,  $\text{CDCl}_3$ ):  $\delta$  136.2, 135.7, 135.4, 133.9, 133.7, 129.7, 128.4, 128.0, 127.7, 127.0, 100.5, 79.6, 70.9, 68.2, 61.4, 59.4, 38.4, 37.8, 28.9, 27.0, 19.3, 18.3, 12.7. **ESI-MS**  $m/z$  (rel int): (pos) 697.3 ( $[\text{M}+\text{Na}]^+$ , 100); (neg) 673.3 ( $[\text{M}-\text{H}]^-$ , 100).

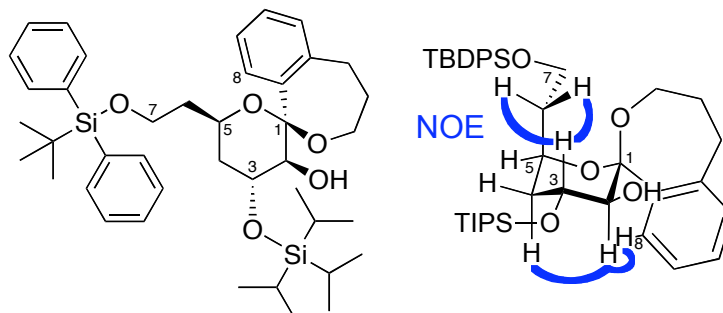

(-)-(1*R*,3'*S*,4'*R*,6'*R*)-6'-(2-(*tert*-Butyldiphenylsilyloxy)ethyl)-4'-(triisopropylsilyloxy)-3',4',5,5',6'-hexahydro-3*H*-spiro[benzo[*c*]oxepine-1,2'-pyran]-3'-ol (**4l**). Clear oil (40 mg, 91%). **TLC**:  $R_f$  0.67 (4:1 hexanes/EtOAc).  $[\alpha]_D^{19}$ :  $-15.2^\circ$  ( $c$  1.4  $\text{CHCl}_3$ ). **IR** (NaCl, film): 3586 (O–H st), 3063, 3021, 2944, 2864, 1464, 1384, 1253, 1102 (C–O st), 1018, 889, 751, 698.  $^1\text{H-NMR}$  (500 MHz):  $\delta$  7.65 (m, 4H), 7.53 (d, 1H,  $J = 7.7$ ), 7.41–7.33 (m, 4H), 7.28–7.24 (m, 3H), 7.21 (t, 1H,  $J = 7.3$ ), 7.05 (d, 1H,  $J = 7.4$ ), 4.49 (app qd, 1H,  $J = 6.7, 2.5$ ), 4.30 (td, 1H,  $J = 9.0, 4.6$ ), 3.82 (dt, 1H,  $J = 10.3, 6.2$ ), 3.68 (tt, 2H,  $J = 11.2, 5.7$ ), 3.55 (td, 1H,  $J = 13.1, 6.8$ ), 3.49 (d, 1H,  $J = 8.5$ ), 3.46 (t, 1H,  $J = 8.8$ ), 2.43 (dd, 1H,  $J = 13.3, 5.3$ ), 2.25 (d, 1H,  $J = 5.6$ ), 2.22–2.14 (m, 2H), 2.10 (dt, 1H,  $J = 13.3, 3.8$ ), 2.00 (ddd, 1H,  $J = 13.3, 9.9, 6.1$ ), 1.89 (app dq, 1H,  $J = 13.4, 6.7$ ), 1.63 (tt, 1H,  $J = 12.9, 6.3$ ), 1.08 (m, 30H).  $^{13}\text{C-NMR}$  (125 MHz):  $\delta$  140.6, 138.7, 135.7, 134.0, 133.8, 129.7, 128.9, 128.5, 127.7, 127.0, 106.8, 82.7, 69.9, 68.2, 61.2, 59.9, 38.6, 37.8, 30.5, 28.9, 27.0, 19.4, 18.3, 12.7. **ESI-MS**  $m/z$  (rel int): (pos) 711.4 ( $[\text{M}+\text{Na}]^+$ , 100); (neg) 687.3 ( $[\text{M}+\text{Cl}]^-$ , 100).

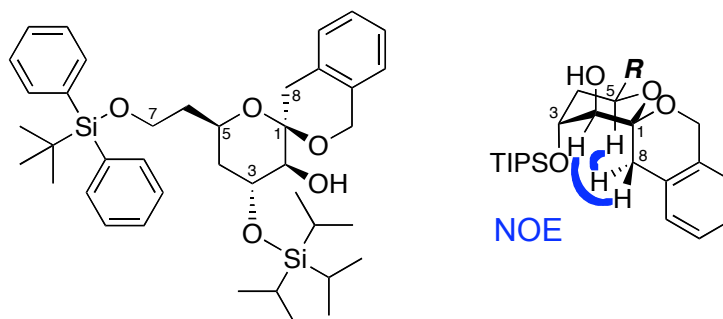

(-)-(2'*R*,3'*S*,4'*R*,6'*R*)-6'-(2-(*tert*-Butyldiphenylsilyloxy)ethyl)-4'-(triisopropylsilyloxy)-3',4',5,6'-tetrahydrospiro[isochroman-3,2'-pyran]-3'-ol (**4m**). Clear oil (40 mg, 84%). **TLC**:  $R_f$  0.40 (4:1 hexanes/EtOAc).  $[\alpha]_D^{19}$ :  $-1.5^\circ$  ( $c$  1.2,  $\text{CHCl}_3$ ). **IR** (NaCl, film): 3562 (O–H st), 3073, 3013, 2959, 2862, 1465, 1427, 1387, 1258, 1108 (C–O st), 1062, 884, 740, 700.  $^1\text{H-NMR}$  (500 MHz):  $\delta$  7.57–7.55 (m, 2H), 7.45–7.42 (m, 2H), 7.42–7.32 (m, 4H), 7.29–7.26 (m, 2H), 7.18–7.15 (m, 1H), 7.11 (td, 1H,  $J = 7.3, 0.9$ ), 7.01 (dd, 2H,  $J = 16.1, 7.4$ ), 4.99 (d, 1H,  $J = 14.3$ ), 4.73 (d, 1H,  $J = 14.4$ ), 4.32 (q, 1H,  $J = 3.3$ ), 4.26–4.21 (m, 1H), 3.57 (dd, 1H,  $J = 3.7, 2.0$ ), 3.55–3.46 (m, 3H), 3.06 (d, 1H,  $J = 16.8$ ), 3.02 (d, 1H,  $J = 1.6$ ), 1.93 (ddd, 1H,  $J = 13.9, 11.1, 2.9$ ), 1.73–1.62 (m, 2H), 1.58 (dt, 1H,  $J = 13.9, 2.7$ ), 1.21–1.08 (m, 21H), 0.95 (s, 9H).

$^{13}\text{C-NMR}$  (125 MHz):  $\delta$  135.6, 134.1, 131.4, 129.6, 129.5, 129.1, 127.7, 126.9, 126.0, 123.7, 97.1, 72.5, 69.5, 65.0, 63.0, 60.0, 38.8, 34.6, 33.6, 26.9, 19.2, 18.3, 12.4. **ESI-MS**  $m/z$  (rel int): (pos) 697.5 ( $[\text{M}+\text{Na}]^+$ , 100); (neg) 673.4 ( $[\text{M}-\text{H}]^-$ , 100).

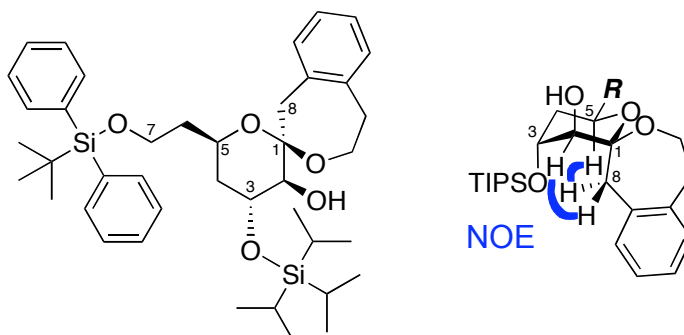

(-)-(2*R*,3'*S*,4'*R*,6'*R*)-6'-(2-(*tert*-Butyldiphenylsilyloxy)ethyl)-4'-(triisopropylsilyloxy)-3',4,4',5,5',6'-hexahydro-1*H*-spiro[benzo[*d*]oxepine-2,2'-pyran]-3'-ol (**4n**). Clear oil (15 mg, 98%). **TLC**:  $R_f$  0.23 (10:1 hexanes/EtOAc).  $[\alpha]_D^{20}$ :  $-25.6^\circ$  ( $c$  0.5,  $\text{CHCl}_3$ ). **IR** (NaCl, film): 3541 (O–H st), 3065, 3018, 2944, 2866, 1462, 1428, 1390, 1240, 1200, 1095 (C–O st), 1053, 885, 749, 699.  $^1\text{H-NMR}$  (500 MHz):  $\delta$  7.56–7.53 (m, 4H), 7.42–7.33 (m, 6H), 6.98 (t, 1H,  $J = 4.3$ ), 6.87 (m, 1H), 6.83 (m, 2H), 4.26 (q, 1H,  $J = 2.8$ ), 4.04 (t, 1H,  $J = 11.0$ ), 3.93 (d, 1H,  $J = 15.4$ ), 3.89–3.85 (m, 1H), 3.82 (ddd, 1H,  $J = 12.0, 5.0, 2.7$ ), 3.49 (d, 1H,  $J = 2.8$ ), 3.20–3.14 (m, 3H), 3.06–3.01 (m, 2H), 2.62 (dd, 1H,  $J = 15.2, 4.5$ ), 1.80 (ddd, 1H,  $J = 14.1, 11.5, 2.9$ ), 1.62 (dtd, 1H,  $J = 14.0, 8.6, 5.5$ ), 1.54–1.47 (m, 2H), 1.07 (m, 30H).  $^{13}\text{C-NMR}$  (125 MHz):  $\delta$  140.8, 136.1, 135.7, 134.1, 130.5, 129.5, 128.6, 127.6, 126.7, 126.4, 96.5, 70.9, 69.7, 64.9, 61.9, 60.7, 41.5, 39.0, 38.2, 34.2, 27.0, 19.2, 18.3, 12.3. **ESI-MS**  $m/z$  (rel int): (pos) 711.3 ( $[\text{M}+\text{Na}]^+$ , 100); (neg) 687.4 ( $[\text{M}-\text{H}]^-$ , 100).

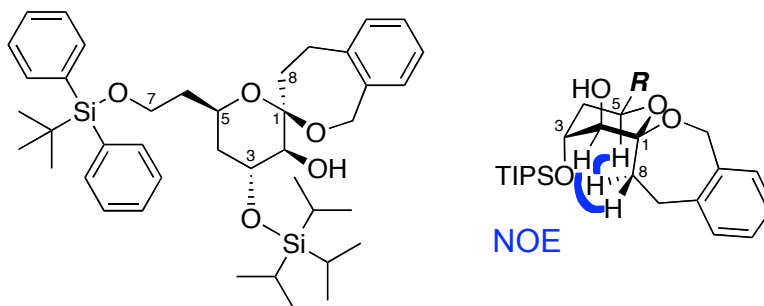

(-)-(2'*R*,3'*S*,4'*R*,6'*R*)-6'-(2-(*tert*-Butyldiphenylsilyloxy)ethyl)-4'-(triisopropylsilyloxy)-3',4,4',5,5',6'-hexahydro-1*H*-spiro[benzo[*c*]oxepine-3,2'-pyran]-3'-ol (**4o**). Clear oil (39 mg, 86%). **TLC**:  $R_f$  0.43 (4:1 hexanes/EtOAc).  $[\alpha]_D^{19}$ :  $-32.2^\circ$  ( $c$  1.3,  $\text{CHCl}_3$ ). **IR** (NaCl, film): 3547 (O–H st), 3065, 3020, 2937, 2764, 1463, 1429, 1390, 1251, 1108 (C–O st), 1075, 1040, 1004, 886, 740, 699.  $^1\text{H-NMR}$  (500 MHz):  $\delta$  7.64–7.63 (m, 4H), 7.39–7.29 (m, 4H), 7.26–7.23 (m, 3H), 7.19 (td, 1H,  $J = 7.1, 1.8$ ), 7.17–7.12 (m, 3H), 5.39 (d, 1H,  $J = 14.2$ ), 4.31 (d, 1H,  $J = 14.2$ ), 4.27–4.23 (m, 2H), 4.00–3.95 (m, 1H), 3.79 (dt, 1H,  $J = 10.1, 5.0$ ), 3.48 (d, 1H,  $J = 3.1$ ), 3.18 (dd, 1H,  $J = 15.1, 11.1$ ), 3.07 (d, 1H,  $J = 0.6$ ), 2.75–2.70 (m, 1H), 2.62 (dd, 1H,  $J = 15.2, 8.7$ ), 2.01–1.96 (m, 1H), 1.91 (ddd, 1H,  $J = 14.0, 11.3, 2.9$ ), 1.84–1.71 (m, 2H), 1.56–1.53 (m, 1H), 1.12–1.06 (m, 30H).  $^{13}\text{C-NMR}$  (125 MHz):  $\delta$  142.6, 138.8, 135.7, 133.9, 129.7, 129.1, 127.9,

127.8, 127.7, 126.0, 100.0, 71.5, 69.5, 64.7, 64.5, 60.1, 39.1, 34.7, 32.5, 28.8, 27.0, 19.3, 18.3, 12.3. **ESI-MS**  $m/z$  (rel int): (pos) 711.3 ( $[M+Na]^+$ , 100); (neg) 687.1 ( $[M-H]^-$ , 100) 723.1 ( $[M+Cl]^-$ , 40).

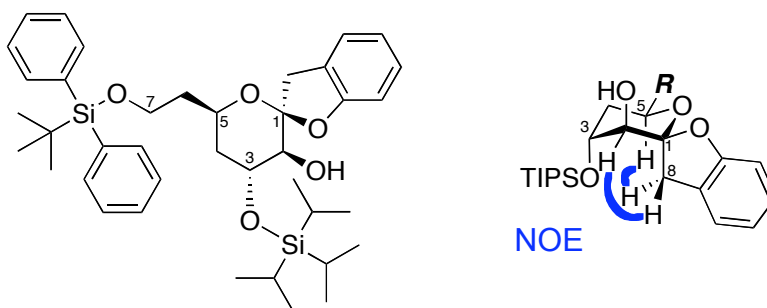

(-)-(2*S*,3'*S*,4'*R*,6'*R*)-6'-(2-(*tert*-Butyldiphenylsilyloxy)ethyl)-4'-(triisopropylsilyloxy)-3',4',5',6'-tetrahydro-3*H*-spiro[benzofuran-2,2'-pyran]-3'-ol (**4p**). Clear oil (12 mg, 67%). **TLC**:  $R_f$  0.31 (1:1 hexanes/EtOAc).  $[\alpha]_D^{20}$ :  $-9.2^\circ$  ( $c$  0.5,  $CHCl_3$ ). **IR** (NaCl, film): 3581 (O–H st), 3060, 2934, 2862, 1662, 1471, 1427, 1388, 1240, 1097 (C–O st), 1013, 878, 745, 696.  **$^1H$ -NMR** (500 MHz):  $\delta$  7.62 (dd, 2H,  $J = 8.0, 1.4$ ), 7.53 (dd, 2H,  $J = 7.9, 1.2$ ), 7.42–7.38 (m, 1H), 7.33 (td, 3H,  $J = 7.4, 1.6$ ), 7.20–7.16 (m, 3H), 7.12 (d, 1H,  $J = 7.3$ ), 6.92 (td, 1H,  $J = 7.4, 0.7$ ), 6.87 (d, 1H,  $J = 7.9$ ), 4.55–4.51 (m, 1H), 4.37 (q, 1H,  $J = 3.9$ ), 3.82–3.77 (dd, 1H,  $J = 4.7, 3.4$ ), 3.78–3.75 (m, 1H), 3.62–3.58 (m, 1H), 3.42 (m, 2H), 2.65 (d, 1H,  $J = 3.0$ ), 2.03 (ddd, 1H,  $J = 13.5, 9.8, 3.4$ ), 1.92–1.87 (m, 1H), 1.81–1.77 (m, 1H), 1.73–1.69 (ddd, 1H,  $J = 13.6, 4.5, 3.1$ ), 1.18–1.09 (m, 21H), 1.03–1.00 (s, 9H).  **$^{13}C$ -NMR** (125 MHz):  $\delta$  157.2, 135.6, 133.8, 129.6, 128.0, 127.7, 126.5, 125.3, 121.6, 111.2, 109.9, 73.2, 69.4, 66.0, 59.6, 38.3, 38.1, 34.8, 26.9, 19.3, 18.3, 12.5. **ESI-MS**  $m/z$  (rel int): (pos) 683.2 ( $[M+Na]^+$ , 100); (neg) 659.2 ( $[M-H]^-$ , 100).

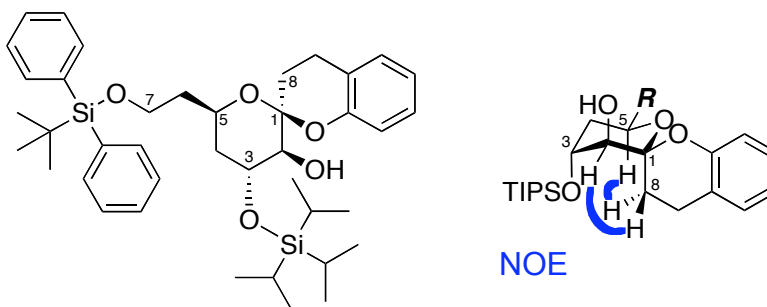

(-)-(2*S*,3'*S*,4'*R*,6'*R*)-6'-(2-(*tert*-Butyldiphenylsilyloxy)ethyl)-4'-(triisopropylsilyloxy)-3',4',5',6'-tetrahydrospiro[chroman-2,2'-pyran]-3'-ol (**4q**). Clear oil (60 mg, 90%). **TLC**:  $R_f$  0.48 (4:1 hexanes/EtOAc).  $[\alpha]_D^{19}$ :  $-0.5^\circ$  ( $c$  1.7,  $CHCl_3$ ). **IR** (NaCl, film): 3582 (O–H st), 3069, 2952, 2861, 1539, 1462, 1425, 1385, 1225, 1109 (C–O st), 1068, 1000, 880, 747, 697.  **$^1H$ -NMR** (500 MHz):  $\delta$  7.60 (m, 4H), 7.43–7.38 (m, 2H), 7.37–7.32 (m, 4H), 7.08 (t, 1H,  $J = 7.7$ ), 7.01 (d, 1H,  $J = 7.1$ ), 6.88 (t, 1H,  $J = 7.4$ ), 6.82 (d, 1H,  $J = 7.6$ ), 4.41–4.36 (m, 2H), 3.67 (td, 1H,  $J = 10.0, 3.7$ ), 3.61 (dd, 1H,  $J = 4.6, 3.1$ ), 3.51 (dt, 1H,  $J = 10.0, 4.8$ ), 3.06–2.99 (m, 1H), 2.86 (d, 1H,  $J = 3.0$ ), 2.75 (ddd, 1H,  $J = 14.0, 5.5, 2.0$ ), 2.55 (dt, 1H,  $J = 16.2, 2.6$ ), 2.00 (ddd, 1H,  $J = 13.3, 9.3, 3.7$ ), 1.86 (td, 1H,  $J = 13.9, 5.5$ ), 1.82–1.77 (m, 1H), 1.73–1.64 (m, 2H), 1.18–1.06 (m, 21H), 1.01 (s, 9H).  **$^{13}C$ -NMR** (125 MHz):  $\delta$  151.8, 135.6, 134.0, 129.6, 129.2, 127.7,

127.3, 122.9, 121.1, 116.9, 98.8, 73.9, 69.2, 65.8, 59.9, 38.6, 35.4, 27.0, 26.6, 20.7, 19.3, 18.3, 12.4. **ESI-MS**  $m/z$  (rel int): (pos) 697.4 ( $[M+Na]^+$ , 100); (neg) 6735 ( $[M-H]^-$ , 100).

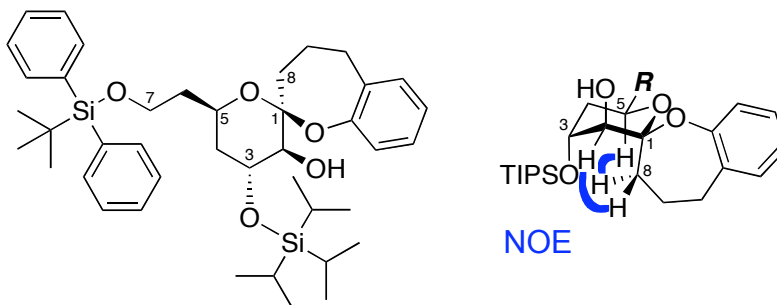

**(+)-(2*S*,3'*S*,4'*R*,6'*R*)-6'-(2-(*tert*-Butyldiphenylsilyloxy)ethyl)-4'-(triisopropylsilyloxy)-3',4,4',5,5',6'-hexahydro-3*H*-spiro[benzo[*b*]oxepine-2,2'-pyran]-3'-ol (4r)**. Clear oil (5 mg, 90%). **TLC**:  $R_f$  0.62 (4:1 hexanes/EtOAc).  $[\alpha]_D^{21}$ : +3.3° ( $c$  0.8,  $CHCl_3$ ). **IR** (NaCl, film): 3619 (O–H st), 3064, 3044, 2935, 2863, 1460, 1431, 1389, 1235, 1105 (C–O st), 1071, 1004, 880, 736, 697.  **$^1H$ -NMR** (500 MHz):  $\delta$  7.60–7.57 (m, 4H), 7.44–7.32 (m, 6H), 7.09–7.04 (m, 2H), 6.97 (td, 1H,  $J$  = 7.3, 1.2), 6.90 (dd, 1H,  $J$  = 7.8, 1.1), 4.32 (q, 1H,  $J$  = 3.1), 4.20–4.16 (m, 1H), 3.64–3.60 (m, 1H), 3.59 (d, 1H,  $J$  = 2.9), 3.51 (dt, 1H,  $J$  = 9.8, 4.9), 3.33 (d, 1H,  $J$  = 0.9), 2.78–2.71 (m, 3H), 1.90 (ddd, 1H,  $J$  = 14.0, 11.4, 2.9), 1.83–1.78 (m, 1H), 1.78–1.71 (m, 1H), 1.65–1.56 (m, 3H), 1.48 (dt, 1H,  $J$  = 13.7, 2.2), 1.13–0.99 (m, 30H).  **$^{13}C$ -NMR** (125 MHz):  $\delta$  153.0, 135.6, 134.8, 134.2, 129.6, 129.2, 127.7, 127.0, 124.1, 122.6, 101.4, 71.5, 69.6, 64.9, 59.7, 38.9, 34.3, 32.3, 32.0, 27.0, 20.2, 19.3, 18.3, 12.3. **ESI-MS**  $m/z$  (rel int): (pos) 711.3 ( $[M+Na]^+$ , 100); (neg) 687.3 ( $[M+Cl]^-$ , 100).

## **V. SPIROCYCLIZATION WITH INVERSION OF CONFIGURATION (MeOH or AcOH)**

### **(5a–r)**

#### **A. GENERAL PROCEDURE FOR EPOXIDATION AND MeOH-INDUCED SPIROCYCLIZATION**

##### **(5a,b,d,j,m)**

The glycol alcohol **2a,b,d,j,m** (1.0 equiv) was dissolved in 5:1 MeOH/ $CH_2Cl_2$  (final ratio 5:1:1 MeOH/ $CH_2Cl_2$ /acetone) and cooled to  $-63$  °C. DMDO (0.09 M in acetone, 1.2 equiv) was added via syringe, and the reaction mixture was stirred at  $-63$  °C. After 3 h, the mixture was warmed to rt and concentrated to dryness. Silica flash chromatography provided the ‘inversion’ spiroketals **5a,b,d,j,m**.

$^1H$ -NMR resonances were assigned based on COSY analysis of purified products. The ‘retention’ spiroketals **4** and ‘inversion’ spiroketals **5** could be readily distinguished by examination of diagnostic  $^1H$ -NMR peaks: C5-H (*threo*:  $\delta$  3.46–4.22;  $\delta$  **4** >  $\delta$  **5**) or (*erythro*:  $\delta$  3.88–4.73;  $\delta$  **5** >  $\delta$  **4**). Conformational assignments were based on analyses of NOESY spectra and/or coupling constants.<sup>17</sup>  $J$  values were determined by  $^1H$ -NMR, except for compound **5j**, where a  $J$ -resolve experiment was used. The  $^4C_1$  and  $^1C_4$  chair conformers could be distinguished based on  $J$  values:  $^4C_1$  chair conformation (*threo*:  $J_{23}$  > 7.0 and  $J_{54ax}$  > 7.0; *erythro*:  $J_{23}$  < 7.0 and  $J_{54ax}$  > 7.0) or  $^1C_4$  chair conformation (*erythro*:  $J_{23}$  > 7.0 and  $J_{54ax}$  < 7.0).

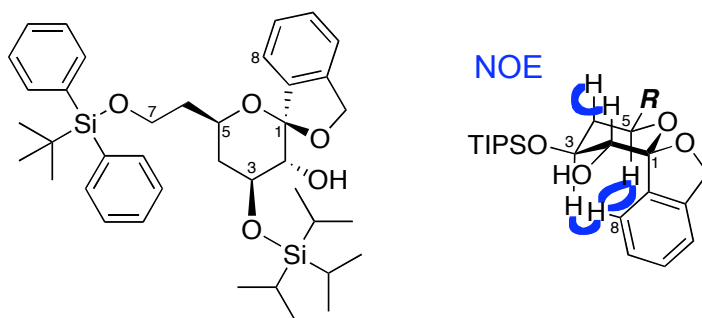

**(+)-(1*R*,3'*R*,4'*S*,6'*R*)-6'-(2-(*tert*-Butyldiphenylsilyloxy)ethyl)-4'-(triisopropylsilyloxy)-3',4',5',6'-tetrahydro-3*H*-spiro[isobenzofuran-1,2'-pyran]-3'-ol (5a).** Clear oil (37 mg, 88%). **TLC:**  $R_f$  0.35 (4:1 hexanes/EtOAc).  $[\alpha]_D^{19}$ : +34.1° (*c* 1.2, CHCl<sub>3</sub>). **IR** (NaCl, film): 3491 (O–H st), 3065, 2941, 2866, 1465, 1428, 1367, 1256, 1106 (C–O st), 1029, 880, 742, 700. **<sup>1</sup>H-NMR** (500 MHz):  $\delta$  7.52 (dd, 2H,  $J = 8.0, 1.4$ ), 7.45–7.41 (m, 3H), 7.39–7.36 (m, 2H), 7.35–7.31 (m, 4H), 7.28–7.25 (m, 3H), 5.29 (d, 1H,  $J = 12.5$ ), 5.10 (d, 1H,  $J = 12.6$ ), 4.55 (ddd, 1H,  $J = 11.2, 9.4, 5.1$ ), 4.15–4.10 (m, 1H), 3.83 (dd, 1H,  $J = 9.4, 2.9$ ), 3.65 (ddd, 1H,  $J = 10.2, 8.2, 4.3$ ), 3.58–3.54 (m, 1H), 2.22 (d, 1H,  $J = 2.9$ ), 2.17 (ddd, 1H,  $J = 12.9, 5.1, 1.9$ ), 1.76–1.62 (m, 3H), 1.13–1.10 (m, 21H), 0.90 (s, 9H). **<sup>13</sup>C-NMR** (125 MHz):  $\delta$  141.8, 137.2, 135.6, 133.8, 129.6, 129.1, 127.7, 127.2, 123.3, 121.9, 111.5, 78.5, 72.1, 71.0, 65.9, 59.7, 40.6, 38.6, 26.9, 19.2, 18.3, 12.7. **ESI-MS**  $m/z$  (rel int): (pos) 683.4 ([M+Na]<sup>+</sup>, 100); (neg) 659.5 ([M–H]<sup>–</sup>, 100).

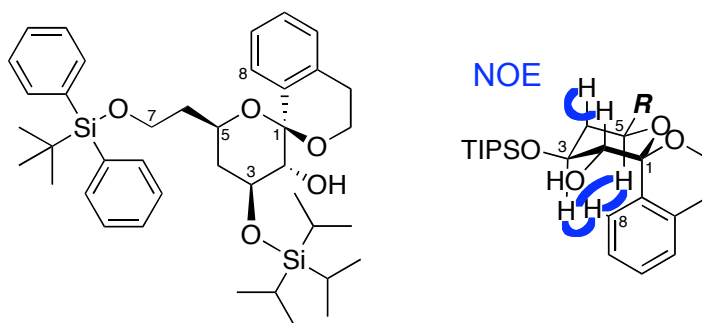

**(+)-(1*R*,3'*R*,4'*S*,6'*R*)-6'-(2-(*tert*-Butyldiphenylsilyloxy)ethyl)-4'-(triisopropylsilyloxy)-3',4',5',6'-tetrahydrospiro[isochroman-1,2'-pyran]-3'-ol (5b).** Clear oil (29 mg, 68%). **TLC:**  $R_f$  0.55 (5:1 hexanes/EtOAc).  $[\alpha]_D^{20}$ : +16.8° (*c* 1.2, CHCl<sub>3</sub>). **IR** (NaCl, film): 3491 (O–H st), 3064, 2935, 2864, 1464, 1429, 1382, 1249, 1101 (C–O st), 1014, 881, 822, 741, 698. **<sup>1</sup>H-NMR** (500 MHz):  $\delta$  7.53–7.47 (m, 5H), 7.42–7.38 (m, 2H), 7.36–7.30 (m, 4H), 7.27–7.24 (m, 1H), 7.21 (td, 2H,  $J = 8.0, 2.3$ ), 4.60 (ddd, 1H,  $J = 10.9, 8.9, 5.6$ ), 4.30 (ddd, 1H,  $J = 10.4, 7.1, 5.8$ ), 3.89–3.85 (m, 1H), 3.83–3.78 (m, 1H), 3.75 (dd, 1H,  $J = 8.9, 3.4$ ), 3.67–3.58 (m, 2H), 2.91 (dd, 2H,  $J = 9.5, 4.0$ ), 2.21 (d, 1H,  $J = 3.4$ ), 2.10 (ddd, 1H,  $J = 12.9, 5.6, 2.2$ ), 1.77 (ddt, 1H,  $J = 13.7, 8.4, 5.2$ ), 1.72–1.63 (m, 2H), 1.16–1.12 (m, 21H), 0.91 (s, 9H). **<sup>13</sup>C-NMR** (125 MHz):  $\delta$  136.6, 135.6, 134.1, 133.9, 129.6, 129.2, 128.2, 127.7, 127.3, 125.4, 99.9, 81.1, 71.8, 66.6, 60.9, 60.1, 40.2, 39.0, 29.9, 26.9, 19.2, 18.3, 12.7. **ESI-MS**  $m/z$  (rel int): (pos) 697.4 ([M+Na]<sup>+</sup>, 100); (neg) 673.5 ([M–H]<sup>–</sup>, 100).



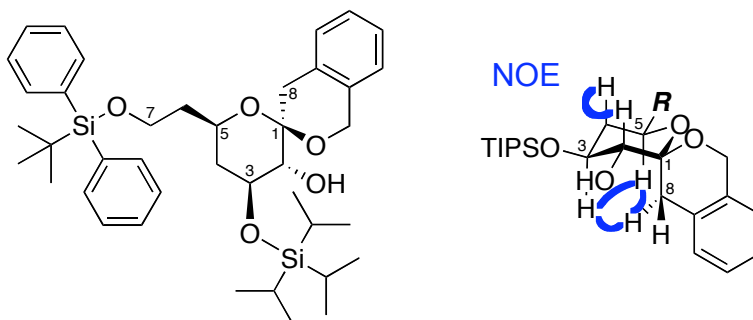

(-)-(2'*R*,3'*R*,4'*S*,6'*R*)-6'-(2-(*tert*-Butyldiphenylsilyloxy)ethyl)-4'-(triisopropylsilyloxy)-3',4',5',6'-tetrahydrospiro[isochroman-3,2'-pyran]-3'-ol (**5d**). Clear oil (40 mg, 87%). TLC:  $R_f$  0.57 (4:1 hexanes/EtOAc).  $[\alpha]_D^{20}$ :  $-0.7^\circ$  (*c* 1.1 CHCl<sub>3</sub>). IR (NaCl, film): 3484 (O–H st), 3061, 3039, 2939, 2864, 1462, 1432, 1376, 1240, 1224, 1102 (C–O st), 1054, 881, 827, 741, 698. <sup>1</sup>H-NMR (500 MHz):  $\delta$  7.56–7.54 (m, 2H), 7.47–7.45 (m, 2H), 7.43–7.33 (m, 4H), 7.31–7.28 (m, 2H), 7.16–7.10 (m, 2H), 7.07 (d, 1H, *J* = 7.1), 7.00 (dd, 1H, *J* = 7.2, 0.9), 4.99 (d, 1H, *J* = 14.3), 4.75 (d, 1H, *J* = 14.4), 3.98 (ddd, 1H, *J* = 11.1, 9.3, 4.9), 3.77–3.73 (m, 1H), 3.49 (dd, 3H, *J* = 7.0, 5.5), 3.31 (d, 1H, *J* = 16.6), 2.82 (d, 1H, *J* = 16.7), 2.42 (d, 1H, *J* = 1.3), 1.98 (ddd, 1H, *J* = 12.8, 4.9, 2.1), 1.74–1.63 (m, 2H), 1.55 (q, 1H, *J* = 12.1), 1.14–1.10 (m, 21H), 0.96 (s, 9H). <sup>13</sup>C-NMR (125 MHz):  $\delta$  135.6, 134.3, 133.9, 131.2, 129.6, 129.0, 127.7, 126.8, 125.9, 123.8, 99.3, 79.4, 71.2, 66.6, 63.3, 60.2, 40.7, 38.6, 27.5, 27.0, 19.3, 18.3, 12.7. ESI-MS *m/z* (rel int): (pos) 697.3 ([M+Na]<sup>+</sup>, 100); (neg) 673.3 ([M–H]<sup>–</sup>, 100).

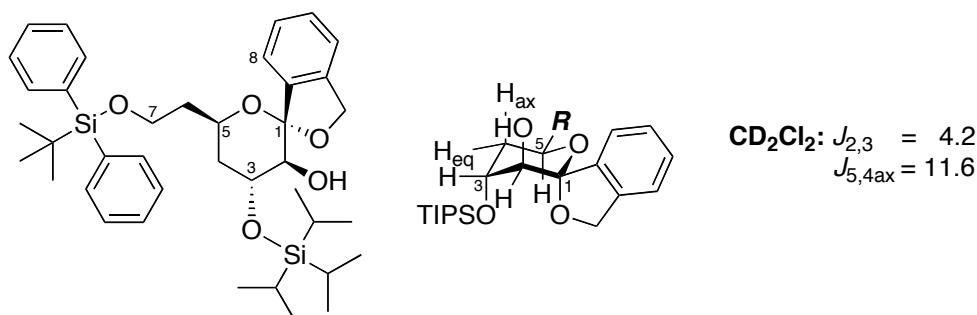

(+)-(1*R*,3'*S*,4'*R*,6'*R*)-6'-(2-(*tert*-Butyldiphenylsilyloxy)ethyl)-4'-(triisopropylsilyloxy)-3',4',5',6'-tetrahydro-3*H*-spiro[isobenzofuran-1,2'-pyran]-3'-ol (**5j**). Clear oil (31 mg, 84%). TLC:  $R_f$  0.44 (4:1 hexanes/EtOAc).  $[\alpha]_D^{20}$ :  $+12.4^\circ$  (*c* 1.0, CHCl<sub>3</sub>). IR (NaCl, film): 3469 (O–H st), 3063, 3012, 2944, 2863, 1465, 1428, 1381, 1252, 1111 (C–O st), 1072, 1016, 975, 887, 741, 699. <sup>1</sup>H-NMR (500 MHz, CD<sub>2</sub>Cl<sub>2</sub>):  $\delta$  7.64–7.61 (m, 4H, Ar-H), 7.52 (d, 1H, Ar-H, *J* = 7.6), 7.38–7.31 (m, 5H, Ar-H), 7.29–7.22 (m, 4H, Ar-H), 5.04 (d, 1H, C12-H, *J* = 12.8), 4.97 (d, 1H, C12-H, *J* = 12.8), 4.73 (dtd, 1H, C5-H, *J* = 11.6, 6.4, 2.4), 4.23 (q, 1H, C3-H, *J* = 3.8), 3.77–3.73 (m, 1H, C2-H), 3.72 (dd, 1H, C7-H, *J* = 6.8, 4.2), 3.65 (dt, 1H, C7-H, *J* = 10.3, 5.2), 2.04 (d, 1H, C2-OH, *J* = 7.0), 1.96 (ddd, 1H, C4-H, *J* = 13.9, 11.6, 3.8), 1.73–1.67 (m, 3H, C4-H, C6-H), 1.13–1.06 (m, 21H, TIPS), 1.01 (s, 9H, *t*-Bu). <sup>1</sup>H-NMR (500 MHz, C<sub>6</sub>D<sub>6</sub>):  $\delta$  7.77–7.75 (m, 4H), 7.73 (dt, 1H, *J* = 4.4, 2.2), 7.22–7.18 (m, 4H), 7.12 (d, 2H, *J* = 7.6), 7.10–7.09 (m, 2H), 6.87–6.85 (m, 1H), 5.09–5.03 (m, 2H), 4.86 (d, 1H, *J* = 12.8), 4.22 (q, 1H, *J* = 3.2), 3.95 (ddd, 1H, *J* = 10.0, 8.3, 5.5), 3.71 (dt, 1H, *J* = 9.9, 5.0), 3.63 (dd, 1H, *J* = 6.8, 3.2), 2.03 (ddd, 1H, *J* = 13.8, 11.6, 3.1), 1.77 (td, 2H, *J* = 8.2, 5.2), 1.68 (dt, 1H, *J* = 13.7, 2.3), 1.45 (d, 1H, *J* = 6.8), 1.22–1.10 (m, 30H). <sup>13</sup>C-NMR (125 MHz, CDCl<sub>3</sub>):  $\delta$  140.8, 140.4, 135.7, 134.2, 129.5, 129.1, 127.7,



127.4, 124.6, 121.2, 109.8, 72.2, 71.7, 69.9, 64.2, 60.2, 38.9, 35.4, 26.9, 19.3, 18.2, 12.5. **ESI-MS**  $m/z$  (rel int): (pos) 683.3 ( $[M+Na]^+$ , 100); (neg) 659.3 ( $[M-H]^-$ , 100).

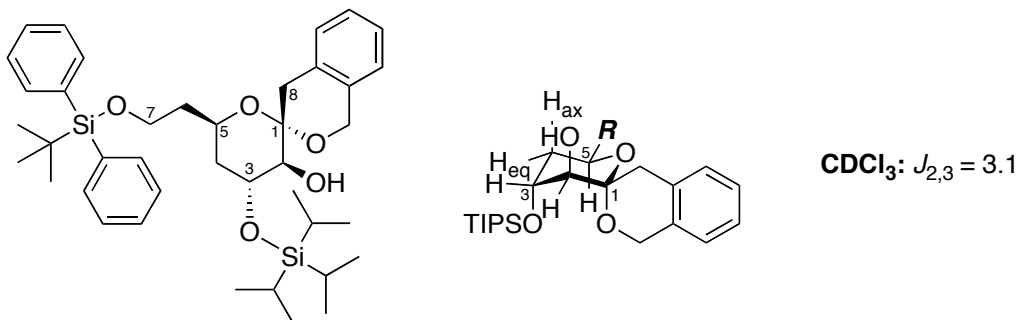

**(+)-(2'S,3'S,4'R,6'R)-6'-(2-(tert-Butyldiphenylsilyloxy)ethyl)-4'-(triisopropylsilyloxy)-3',4',5',6'-tetrahydrospiro[isochroman-3,2'-pyran]-3'-ol (5m).** Clear oil (40 mg, 84%). **TLC:**  $R_f$  0.26 (4:1 hexanes/EtOAc).  $[\alpha]_D^{20}$ : +1.0° ( $c$  2.5,  $CHCl_3$ ). **IR** (NaCl, film): 3482 (O–H st), 3068, 3019, 2952, 2861, 1465, 1425, 1382, 1348, 1247, 1114 (C–O st), 1073, 885, 741, 696. **<sup>1</sup>H-NMR** (500 MHz):  $\delta$  7.59 (m, 4H), 7.41–7.38 (m, 2H), 7.34–7.30 (m, 4H), 7.17–7.12 (m, 2H), 7.09 (m, 1H), 6.89 (t, 1H,  $J = 4.3$ ), 4.98 (d, 1H,  $J = 14.9$ ), 4.61–4.56 (m, 2H), 4.18 (q, 1H,  $J = 3.1$ ), 3.73 (td, 1H,  $J = 9.8, 4.1$ ), 3.59 (dd, 1H,  $J = 7.6, 2.7$ ), 3.53 (dt, 1H,  $J = 10.0, 4.9$ ), 3.02 (d, 1H,  $J = 16.7$ ), 2.86 (d, 1H,  $J = 16.7$ ), 1.78 (m, 2H), 1.68–1.54 (m, 3H), 1.16–0.96 (m, 30H). **<sup>13</sup>C-NMR** (125 MHz):  $\delta$  135.6, 134.1, 134.0, 131.3, 129.6, 129.2, 127.7, 126.4, 125.7, 123.8, 98.2, 72.1, 70.0, 61.6, 61.4, 59.8, 38.7, 35.7, 35.0, 27.0, 19.3, 18.2, 12.5. **ESI-MS**  $m/z$  (rel int): (pos) 697.5 ( $[M+Na]^+$ , 100).

## B. GENERAL PROCEDURE FOR EPOXIDATION AND AcOH-INDUCED SPIROCYCLIZATION (5e-i,k,n-r)

The glycol alcohol **2e-i,k,n-r** (1.0 equiv) was dissolved in  $CH_2Cl_2$  (0.002 M) and cooled to  $-63$  °C. A solution of AcOH (1 M in  $CH_2Cl_2$ , 10 equiv) was cooled to  $-78$  °C, then added to the alcohol. Next, DMDO (0.09 M in acetone, 1.2 equiv) was added via syringe and the reaction mixture was stirred at  $-63$  °C. After 1 h, the mixture was warmed to  $-44$  °C and stirred for 3 h. The reaction mixture was then warmed to rt and quenched with satd aq  $NaHCO_3$ . The aqueous layer was separated and extracted with  $Et_2O$ , then the combined extracts were washed with  $H_2O$  and brine, dried ( $Na_2SO_4$ ), filtered, and concentrated by rotary evaporation. Silica flash chromatography provided the 'inversion' spiroketals **5e-i,k,n-r**.

<sup>1</sup>H-NMR resonances were assigned based on COSY analysis of purified products. The 'retention' spiroketals **4** and 'inversion' spiroketals **5** could be readily distinguished by examination of diagnostic <sup>1</sup>H-NMR peaks: C5-H (*threo*:  $\delta$  3.46–4.22;  $\delta$  **4** >  $\delta$  **5**) or (*erythro*:  $\delta$  3.88–4.73;  $\delta$  **5** >  $\delta$  **4**). Conformational assignments were based on analyses of NOESY spectra and/or coupling constants.<sup>17</sup>  $J$  values were determined by <sup>1</sup>H-NMR. The <sup>4</sup>C<sub>1</sub> and <sup>1</sup>C<sub>4</sub> chair conformers could be distinguished based on  $J$  values: <sup>4</sup>C<sub>1</sub> chair conformation (*threo*:  $J_{23} > 7.0$  and  $J_{54ax} > 7.0$ ; *erythro*:  $J_{23} < 7.0$  and  $J_{54ax} > 7.0$ ) or <sup>1</sup>C<sub>4</sub> chair conformation (*erythro*:  $J_{23} > 7.0$  and  $J_{54ax} < 7.0$ ).

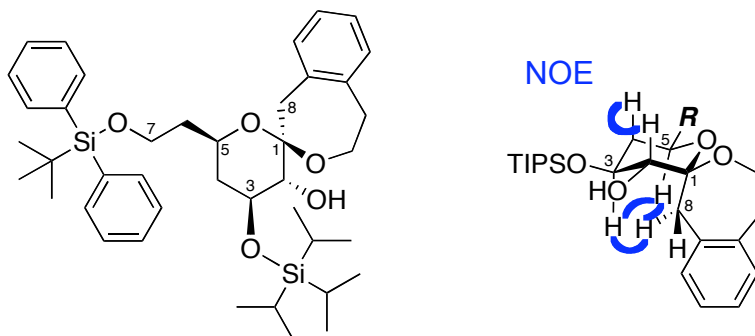

**(+)-(2*R*,3'*R*,4'*S*,6'*R*)-6'-(2-(*tert*-Butyldiphenylsilyloxy)ethyl)-4'-(triisopropylsilyloxy)-3',4,4',5,5',6'-hexahydro-1*H*-spiro[benzo[*d*]oxepine-2,2'-pyran]-3'-ol (5e).** Clear oil (31 mg, 57%). **TLC:**  $R_f$  0.51 (5:1 hexanes/EtOAc).  $[\alpha]_D^{19}$ : +18.4° (*c* 1.5, CHCl<sub>3</sub>). **IR** (NaCl, film): 3477 (O–H st), 3064, 3018, 2938, 2864, 1463, 1383, 1306, 1250, 1107 (C–O st), 1006, 883, 747, 698. **<sup>1</sup>H-NMR** (500 MHz): δ 7.55 (m, 4H), 7.45–7.35 (m, 6H), 6.96 (t, 1H, *J* = 4.2), 6.84 (m, 3H), 4.02–3.97 (m, 2H), 3.85 (ddd, 1H, *J* = 12.0, 5.5, 2.3), 3.50 (d, 1H, *J* = 15.8), 3.48–3.43 (m, 1H), 3.36 (dd, 1H, *J* = 9.0, 2.1), 3.22–3.14 (m, 2H), 2.99 (ddd, 1H, *J* = 10.3, 9.2, 5.5), 2.91 (d, 1H, *J* = 15.9), 2.62 (dd, 1H, *J* = 15.3, 5.1), 2.43 (d, 1H, *J* = 2.2), 1.93 (ddd, 1H, *J* = 12.7, 5.1, 1.7), 1.69–1.61 (m, 1H), 1.53–1.43 (m, 2H), 1.11 (m, 21H), 0.99 (s, 9H). **<sup>13</sup>C-NMR** (125 MHz): δ 140.9, 135.7, 135.1, 134.2, 130.5, 129.6, 128.7, 127.7, 126.7, 126.1, 99.0, 81.0, 72.1, 66.9, 62.0, 60.7, 40.3, 38.7, 38.6, 38.1, 27.0, 19.2, 18.3, 12.8. **ESI-MS** *m/z* (rel int): (pos) 711.5 ([M+Na]<sup>+</sup>, 100); (neg) 687.4 ([M–H]<sup>–</sup>, 100).

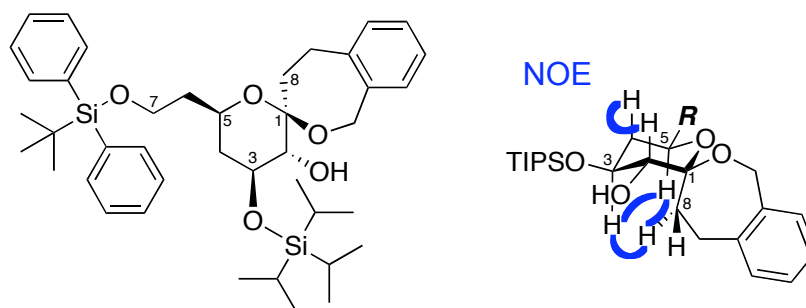

**(+)-(2'*R*,3'*R*,4'*S*,6'*R*)-6'-6-(2-(*tert*-Butyldiphenylsilyloxy)ethyl)-4'-(triisopropylsilyloxy)-3',4,4',5,5',6'-hexahydro-1*H*-spiro[benzo[*c*]oxepine-3,2'-pyran]-3'-ol (5f).** Clear oil (35 mg, 54%). **TLC:**  $R_f$  0.55 (4:1 hexanes/EtOAc).  $[\alpha]_D^{18}$ : +7.5° (*c* 1.3, CHCl<sub>3</sub>). **IR** (NaCl, film): 3493 (O–H st), 3070, 2942, 2891, 2864, 1463, 1427, 1388, 1361, 1244, 1111 (C–O st), 1063, 1022, 941, 882, 853, 759, 701. **<sup>1</sup>H-NMR** (500 MHz, C<sub>6</sub>D<sub>6</sub>): δ 7.85 (m, 4H), 7.31–7.29 (m, 3H), 7.26–7.23 (m, 3H), 7.18 (td, 1H, *J* = 7.3, 1.7), 7.12–7.09 (m, 2H), 7.07–7.05 (m, 1H), 5.55 (d, 1H, *J* = 13.9), 4.30 (d, 1H, *J* = 13.9), 4.08–3.99 (m, 2H), 3.94 (dt, 1H, *J* = 10.4, 5.3), 3.85–3.80 (m, 1H), 3.64 (dd, 1H, *J* = 9.1, 1.0), 3.32 (t, 1H, *J* = 13.4), 2.55 (dd, 1H, *J* = 14.6, 6.8), 2.24–2.19 (m, 1H), 2.10–2.07 (m, 1H), 2.06–2.02 (m, 1H), 1.93–1.86 (m, 2H), 1.83–1.78 (m, 1H), 1.68 (q, 1H, *J* = 12.0), 1.29–1.26 (m, 30H). **<sup>13</sup>C-NMR** (125 MHz, C<sub>6</sub>D<sub>6</sub>): δ 143.2, 140.1, 136.0, 134.1, 131.1, 130.0, 128.8, 128.6, 128.5, 126.3, 102.2, 81.2, 70.8, 66.2, 64.9, 60.9, 41.4, 39.4, 28.3, 28.0, 27.2, 19.5, 18.5, 13.0. **ESI-MS** *m/z* (rel int): (pos) 711.1 ([M+Na]<sup>+</sup>, 100); (neg) 687.4 ([M–H]<sup>–</sup>, 100).

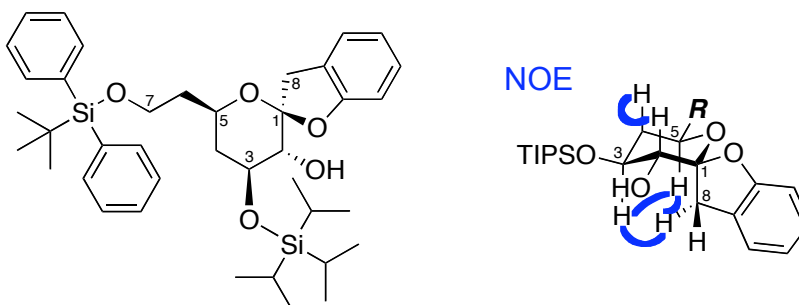

**(+)-(2*S*,3'*R*,4'*S*,6'*R*)-6'-(2-(*tert*-Butyldiphenylsilyloxy)ethyl)-4'-(triisopropylsilyloxy)-3',4',5',6'-tetrahydro-3*H*-spiro[benzofuran-2,2'-pyran]-3'-ol (5g).** Clear oil (25 mg, 43%). **TLC:**  $R_f$  0.23 (10:1 hexanes/EtOAc).  $[\alpha]_D^{20}$ : +8.2° ( $c$  1.3, CHCl<sub>3</sub>). **IR** (NaCl, film): 3519 (O–H st), 3061, 3047, 2932, 2862, 1471, 1430, 1319, 1250, 1108 (C–O st), 1017, 954, 884, 824, 779, 700. **<sup>1</sup>H-NMR** (500 MHz):  $\delta$  7.61 (dd, 2H,  $J$  = 8.0, 1.4), 7.51 (dd, 2H,  $J$  = 8.0, 1.3), 7.42–7.38 (m, 1H), 7.35–7.31 (m, 3H), 7.18 (m, 3H), 7.11 (d, 1H,  $J$  = 7.3), 6.93–6.90 (m, 2H), 4.04–3.99 (m, 1H), 3.87 (ddd, 1H,  $J$  = 11.0, 9.4, 4.7), 3.79–3.73 (m, 2H), 3.61 (dt, 1H,  $J$  = 10.1, 5.0), 3.48 (d, 1H,  $J$  = 16.0), 3.07 (d, 1H,  $J$  = 16.0), 2.44 (d, 1H,  $J$  = 2.4), 2.01 (ddd, 1H,  $J$  = 12.8, 4.7, 2.0), 1.84–1.74 (m, 2H), 1.60 (q, 1H,  $J$  = 12.1), 1.13–1.10 (m, 21H), 1.02 (s, 9H). **<sup>13</sup>C-NMR** (125 MHz):  $\delta$  158.1, 135.6, 133.7, 129.7, 128.0, 127.7, 125.7, 125.2, 121.4, 112.4, 109.7, 76.7, 71.7, 66.4, 59.7, 40.2, 38.0, 32.4, 26.9, 19.3, 18.3, 12.7. **ESI-MS**  $m/z$  (rel int): (pos) 683.3 ([M+Na]<sup>+</sup>, 100); (neg) 659.4 ([M–H]<sup>–</sup>, 65) 695.4 ([M+Cl]<sup>–</sup>, 100).

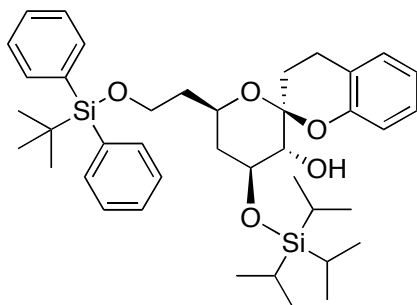

**(2*S*,3'*R*,4'*S*,6'*R*)-6'-(2-(*tert*-Butyldiphenylsilyloxy)ethyl)-4'-(triisopropylsilyloxy)-3',4',5',6'-tetrahydrospiro[chroman-2,2'-pyran]-3'-ol (5h).** Inseparable mixture of 5h and 4h. Clear oil (50 mg, 98%). **TLC:**  $R_f$  0.76 (4:1 hexanes/EtOAc). **ESI-MS**  $m/z$  (rel int): (pos) 697.2 ([M+Na]<sup>+</sup>, 100); (neg) 673.4 ([M–H]<sup>–</sup>, 100).

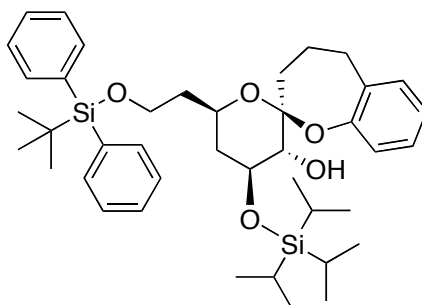

**(2*S*,3'*R*,4'*S*,6'*R*)-6'-(2-(*tert*-Butyldiphenylsilyloxy)ethyl)-4'-(triisopropylsilyloxy)-3',4',5',6'-hexahydro-3*H*-spiro[benzo[*b*]oxepine-2,2'-pyran]-3'-ol (5i).** Inseparable mixture of 5i and 4i.

Clear oil (37 mg, 76%). **TLC:**  $R_f$  0.66 (4:1 hexanes/EtOAc). **ESI-MS**  $m/z$  (rel int): (pos) 711.4 ( $[M+Na]^+$ , 100); (neg) 687.3 ( $[M-H]^-$ , 100).

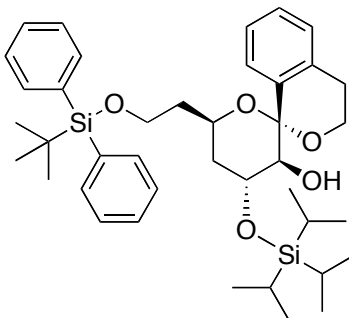

**(1*S*,3'*S*,4'*R*,6'*R*)-6'-(2-(*tert*-Butyldiphenylsilyloxy)ethyl)-4'-(triisopropylsilyloxy)-3',4',5',6'-tetrahydrospiro[isochroman-1,2'-pyran]-3'-ol (5k).** Inseparable mixture of **5k** and **4k**. Clear oil (60 mg, 97%). **TLC:**  $R_f$  0.60 (4:1 hexanes/EtOAc). **ESI-MS**  $m/z$  (rel int): (pos) 697.3 ( $[M+Na]^+$ , 100); (neg) 673.4 ( $[M-H]^-$ , 100).

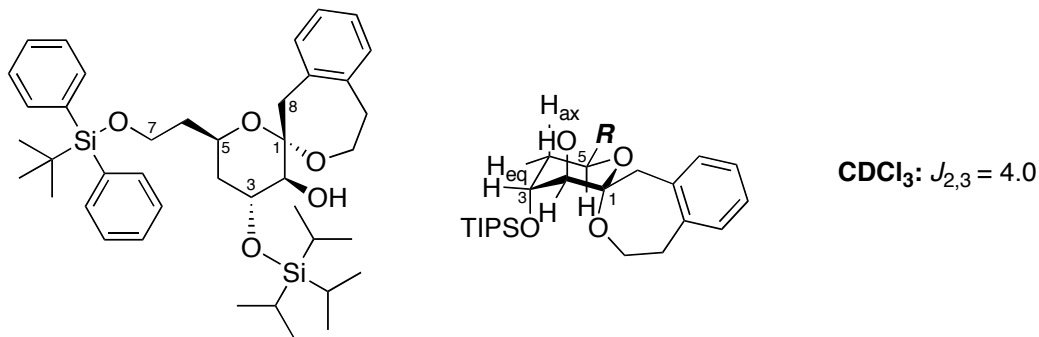

**(+)-(2*S*,3'*S*,4'*R*,6'*R*)-6'-(2-(*tert*-Butyldiphenylsilyloxy)ethyl)-4'-(triisopropylsilyloxy)-3',4,4',5,5',6'-hexahydro-1*H*-spiro[benzo[*d*]oxepine-2,2'-pyran]-3'-ol (5n).** Clear oil (26 mg, 56%). **TLC:**  $R_f$  0.16 (10:1 hexanes/EtOAc).  $[\alpha]_D^{20}$ : +34.9° ( $c$  0.9,  $CHCl_3$ ). **IR** (NaCl, film): 3450 (O–H st), 3062, 3025, 2941, 2863, 1462, 1429, 1386, 1244, 1081 (C–O st), 1031, 944, 885, 788, 697. **<sup>1</sup>H-NMR** (500 MHz):  $\delta$  7.59–7.56 (m, 4H), 7.43–7.32 (m, 6H), 7.11–7.06 (m, 3H), 7.01 (d, 1H,  $J = 7.0$ ), 4.31 (tdd, 1H,  $J = 7.9, 7.4, 3.9$ ), 4.07 (q, 1H,  $J = 4.0$ ), 3.93 (ddd, 1H,  $J = 11.9, 9.8, 1.9$ ), 3.73 (ddd, 1H,  $J = 12.2, 5.4, 3.3$ ), 3.51 (td, 2H,  $J = 9.6, 4.8$ ), 3.45 (dt, 1H,  $J = 10.0, 5.1$ ), 3.22–3.13 (m, 3H), 2.73 (ddd, 1H,  $J = 15.2, 5.4, 1.8$ ), 1.84 (d, 1H,  $J = 7.5$ ), 1.74 (ddd, 1H,  $J = 14.1, 10.9, 3.6$ ), 1.55–1.49 (m, 3H), 1.05 (m, 30H). **<sup>13</sup>C-NMR** (125 MHz):  $\delta$  140.8, 136.8, 135.6, 134.2, 130.9, 129.6, 128.4, 127.7, 126.3, 126.1, 99.1, 71.8, 70.1, 61.4, 60.9, 59.9, 43.1, 38.9, 38.1, 35.5, 27.0, 19.3, 18.2, 12.5. **ESI-MS**  $m/z$  (rel int): (pos) 711.3 ( $[M+Na]^+$ , 100); (neg) 687.5 ( $[M-H]^-$ , 100).

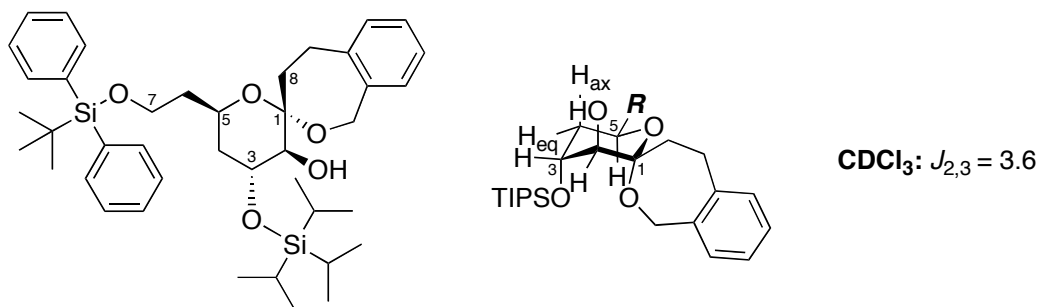

**(+)-(2'S,3'S,4'R,6'R)-6'-(2-(tert-Butyldiphenylsilyloxy)ethyl)-4'-(triisopropylsilyloxy)-3',4,4',5,5',6'-hexahydro-1H-spiro[benzo[c]oxepine-3,2'-pyran]-3'-ol (5o).** Clear oil (39 mg, 43%). **TLC:**  $R_f$  0.36 (4:1 hexanes/EtOAc).  $[\alpha]_D^{19}$ : +23.2° (*c* 1.3, CHCl<sub>3</sub>). **IR** (NaCl, film): 3375 (O–H st), 3066, 3019, 2939, 2863, 1463, 1429, 1384, 1361, 1242, 1111 (C–O st), 1075, 1003, 886, 750, 699. **<sup>1</sup>H-NMR** (500 MHz): δ 7.65–7.61 (m, 4H), 7.40–7.37 (m, 1H), 7.34–7.32 (m, 3H), 7.24 (t, 2H, *J* = 7.4), 7.18–7.10 (m, 3H), 7.05 (d, 1H, *J* = 7.1), 5.12 (d, 1H, *J* = 13.9), 4.44 (dt, 1H, *J* = 5.0, 3.1), 4.17 (d, 1H, *J* = 14.0), 4.07 (q, 1H, *J* = 3.6), 3.96 (ddd, 1H, *J* = 10.1, 8.0, 5.8), 3.78 (dt, 1H, *J* = 10.2, 5.1), 3.47 (dd, 1H, *J* = 7.2, 3.7), 3.19–3.14 (m, 1H), 2.66 (dd, 1H, *J* = 15.0, 7.8), 2.13–2.09 (m, 1H), 1.84–1.68 (m, 4H), 1.66 (d, 1H, *J* = 7.4), 1.61 (dt, 1H, *J* = 13.8, 3.0), 1.12–0.92 (m, 30H). **<sup>13</sup>C-NMR** (125 MHz): δ 142.4, 140.2, 135.7, 134.0, 129.7, 128.8, 127.9, 127.5, 126.0, 120.2, 101.5, 72.0, 70.0, 63.4, 61.3, 60.2, 39.1, 35.5, 34.7, 28.7, 27.0, 19.3, 18.2, 12.4. **ESI-MS** *m/z* (rel int): (pos) 711.2 ([M+Na]<sup>+</sup>, 100); (neg) 687.5 ([M–H]<sup>–</sup>, 100).

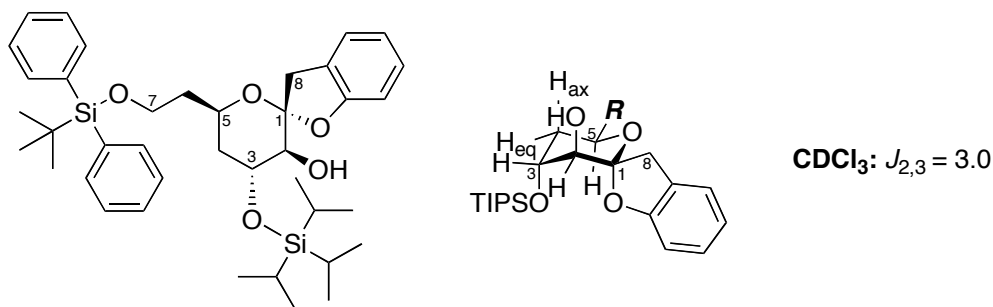

**(+)-(2R,3'S,4'R,6'R)-6'-(2-(tert-Butyldiphenylsilyloxy)ethyl)-4'-(triisopropylsilyloxy)-3',4,5,6'-tetrahydro-3H-spiro[benzofuran-2,2'-pyran]-3'-ol (5p).** Clear oil (34 mg, 68%). **TLC:**  $R_f$  0.31 (1:1 hexanes/EtOAc).  $[\alpha]_D^{80}$ : +51.8° (*c* 1.5, CHCl<sub>3</sub>). **IR** (NaCl, film): 3416 (O–H st), 3060, 3045, 2944, 2864, 1599, 1471, 1428, 1384, 1358, 1240, 1106 (C–O st), 1059, 970, 878, 743, 698. **<sup>1</sup>H-NMR** (500 MHz): δ 7.66 (dd, 2H, *J* = 8.0, 1.4), 7.53 (dd, 2H, *J* = 8.0, 1.3), 7.44–7.33 (m, 4H), 7.24 (dd, 1H, *J* = 7.3, 0.6), 7.18 (t, 2H, *J* = 7.6), 7.15–7.12 (m, 1H), 6.92 (td, 1H, *J* = 7.4, 0.8), 6.75 (d, 1H, *J* = 7.9), 4.91–4.86 (m, 1H), 4.27 (q, 1H, *J* = 3.0), 3.78–3.73 (m, 1H), 3.73 (dd, 1H, *J* = 9.1, 3.3), 3.62 (dt, 1H, *J* = 10.0, 5.0), 3.50 (d, 1H, *J* = 16.8), 3.09 (d, 1H, *J* = 16.7), 1.91–1.85 (m, 2H), 1.76–1.69 (m, 3H), 1.20–1.10 (m, 21H), 1.04–0.99 (s, 9H). **<sup>13</sup>C-NMR** (125 MHz): δ 159.1, 135.7, 134.1, 129.5, 128.0, 127.7, 125.4, 124.8, 120.6, 110.8, 110.2, 71.0, 69.5, 63.4, 59.6, 41.1, 38.7, 34.5, 26.9, 19.3, 18.3, 12.5. **ESI-MS** *m/z* (rel int): (pos) 683.4 ([M+Na]<sup>+</sup>, 100); (neg) 659.3 ([M–H]<sup>–</sup>, 50).

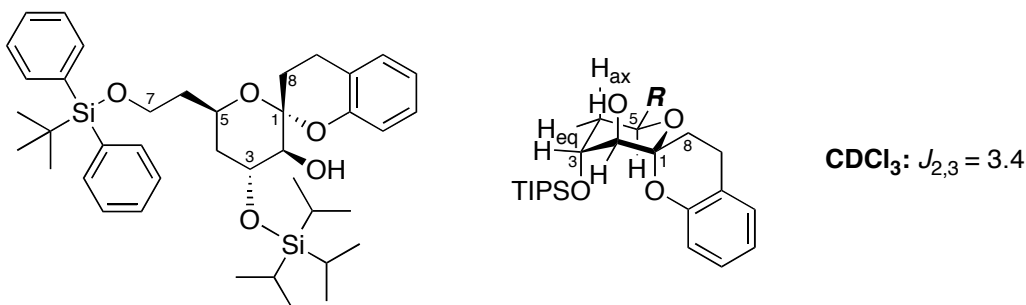

**(+)-(2*R*,3'*S*,4'*R*,6'*R*)-6'-(2-(*tert*-Butyldiphenylsilyloxy)ethyl)-4'-(triisopropylsilyloxy)-3',4',5',6'-tetrahydrospiro[chroman-2,2'-pyran]-3'-ol (5q).** Clear oil (12 mg, 16%). **TLC:**  $R_f$  0.34 (4:1 hexanes/EtOAc).  $[\alpha]_D^{20}$ : +34.8° (*c* 0.9, CHCl<sub>3</sub>). **IR** (NaCl, film): 3452 (O–H st), 3065, 2940, 2864, 2767, 1586, 1463, 1428, 1383, 1234, 1107 (C–O st), 1062, 1002, 886, 745, 699. **<sup>1</sup>H-NMR** (500 MHz): δ 7.58–7.52 (m, 2H), 7.44–7.41 (m, 2H), 7.41–7.26 (m, 6H), 7.03–6.97 (m, 2H), 6.84–6.79 (m, 2H), 4.49–4.43 (m, 1H), 4.16 (q, 1H, *J* = 3.4), 3.66 (dt, 1H, *J* = 7.4, 3.6), 3.50–3.42 (m, 2H), 2.93–2.85 (m, 1H), 2.63–2.58 (m, 1H), 2.22–2.16 (m, 1H), 1.84–1.76 (m, 2H), 1.73 (d, 1H, *J* = 7.5), 1.70–1.57 (m, 3H), 1.22–1.05 (m, 21H), 0.96–0.85 (s, 9H). **<sup>13</sup>C-NMR** (125 MHz): δ 152.2, 135.6, 134.2, 129.5, 128.9, 127.6, 127.2, 122.7, 120.7, 117.4, 98.4, 71.6, 70.1, 62.7, 60.2, 38.9, 35.3, 28.0, 26.9, 20.8, 19.2, 18.3, 12.4. **ESI-MS** *m/z* (rel int): (pos) 697.5 ([*M*+Na]<sup>+</sup>, 100); (neg) 673.4 ([*M*-H]<sup>-</sup>, 100).

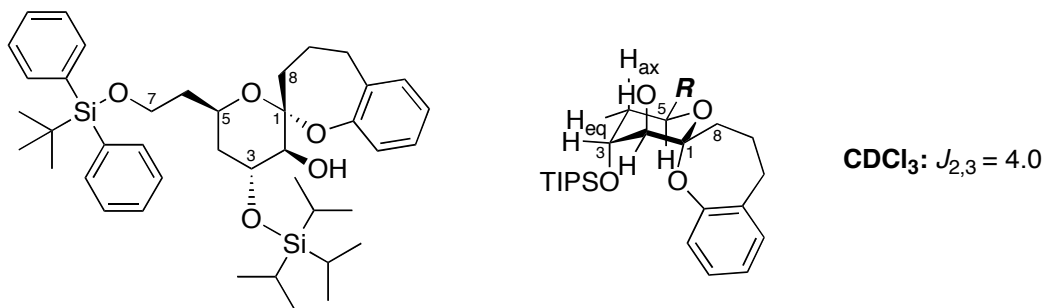

**(+)-(2*R*,3'*S*,4'*R*,6'*R*)-6'-(2-(*tert*-Butyldiphenylsilyloxy)ethyl)-4'-(triisopropylsilyloxy)-3',4',4',5',5',6'-hexahydro-3*H*-spiro[benzo[*b*]oxepine-2,2'-pyran]-3'-ol (5r).** Clear oil (19 mg, 49%). **TLC:**  $R_f$  0.19 (4:1 hexanes/EtOAc).  $[\alpha]_D^{20}$ : +49.6° (*c* 0.9, CHCl<sub>3</sub>). **IR** (NaCl, film): 3418 (O–H st), 3063, 2941, 2863, 1660, 1460, 1434, 1386, 1230, 1106 (C–O st), 1064, 1000, 935, 886, 763, 697. **<sup>1</sup>H-NMR** (500 MHz): δ 7.63–7.60 (m, 4H), 7.44–7.35 (m, 6H), 7.02 (dd, 1H, *J* = 7.8, 1.0), 6.94–6.88 (m, 2H), 6.80 (td, 1H, *J* = 7.4, 1.2), 4.50 (ddt, 1H, *J* = 11.6, 8.6, 3.2), 4.12 (q, 1H, *J* = 4.0), 3.84 (m, 1H), 3.41 (ddd, 1H, *J* = 10.4, 7.7, 5.5), 3.34–3.29 (m, 1H), 2.85 (ddd, 1H, *J* = 14.3, 10.8, 4.0), 2.60–2.53 (m, 1H), 1.89–1.76 (m, 5H), 1.70–1.59 (m, 3H), 1.53 (ddd, 1H, *J* = 13.9, 6.7, 4.0), 1.10 (m, 30H). **<sup>13</sup>C-NMR** (125 MHz): δ 169.6, 154.6, 149.1, 135.7, 134.1, 130.5, 129.7, 127.8, 127.1, 126.2, 122.3, 101.4, 76.8, 71.6, 64.2, 60.4, 38.0, 37.9, 33.9, 29.8, 27.0, 21.1, 19.4, 18.3, 12.5. **ESI-MS** *m/z* (rel int): (pos) 711.3 ([*M*+Na]<sup>+</sup>, 65); (neg) 687.3 ([*M*-H]<sup>-</sup>, 100).

## VI. DESILYLATION OF SPIROKETALS (7, 8)

### GENERAL PROCEDURE FOR DESILYLATION OF SPIROKETALS

Spiroketal **4j**, **5j** (1.0 equiv) were dissolved in 1:1 CH<sub>3</sub>CN/THF (0.1 M), followed by addition of tris(dimethylamino)sulfonium difluorotrimethylsilicate (TAS-F, 10 equiv). The reaction was stirred for 12 h at rt, then concentrated by rotary evaporation. Purification by silica flash chromatography (10:1 CH<sub>2</sub>Cl<sub>2</sub>/MeOH) provided the desilylated spiroketals **7**, **8**, respectively.

<sup>1</sup>H-NMR resonances were assigned based on COSY analysis of purified products. The ‘retention’ spiroketal **7** and ‘inversion’ spiroketal **8** could be readily distinguished by examination of diagnostic <sup>1</sup>H-NMR peaks: C5-H ( $\delta$  **8** >  $\delta$  **7** (4.55 > 4.34)). Conformational assignments were based on analyses of NOESY spectra and/or coupling constants.<sup>17</sup> *J* values were determined by *J*-resolve experiments. The <sup>4</sup>C<sub>1</sub> and <sup>1</sup>C<sub>4</sub> chair conformers could be distinguished based on *J* values: <sup>4</sup>C<sub>1</sub> chair conformation (*threo*:  $J_{23} > 7.0$  and  $J_{54ax} > 7.0$ ; *erythro*:  $J_{23} < 7.0$  and  $J_{54ax} > 7.0$ ) or <sup>1</sup>C<sub>4</sub> chair conformation (*erythro*:  $J_{23} > 7.0$  and  $J_{54ax} < 7.0$ ).

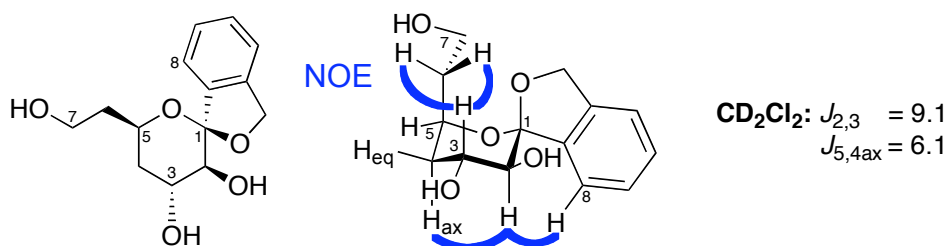

(-)-(1*R*,3'*S*,4'*R*,6'*R*)-6'-(2-hydroxyethyl)-3',4',5',6'-tetrahydro-3*H*-spiro[isobenzofuran-1,2'-pyran]-3',4'-diol (**7**). White solid (8 mg, 89%). TLC:  $R_f$  0.29 (20:1 EtOAc/MeOH).  $[\alpha]_D^{19}$ :  $-5.1^\circ$  ( $c$  0.4, CHCl<sub>3</sub>). IR (NaCl, film): 3371 (O–H st), 3046, 2928, 2868, 1455, 1420, 1373, 1253, 1199, 1067 (C–O st), 1004, 960, 746, 725. <sup>1</sup>H-NMR (500 MHz, CD<sub>2</sub>Cl<sub>2</sub>):  $\delta$  7.39–7.37 (m, 3H, Ar-H), 7.27 (m, 1H, C8-H), 5.23 (d, 1H, C12-H,  $J = 12.7$ ), 5.08 (d, 1H, C12-H,  $J = 12.7$ ), 4.36–4.31 (m, 1H, C5-H), 4.20 (td, 1H, C3-H,  $J = 9.5, 6.1$ ), 3.81 (t, 1H, C2-H,  $J = 9.1$ ), 3.76 (td, 2H, C7-H,  $J = 4.4, 0.5$ ), 2.60 (s, 1H, C-OH), 2.44 (ddt, 1H, C6-H,  $J = 14.1, 10.7, 5.4$ ), 2.01 (ddd, 1H, C4-H,  $J = 13.4, 5.3, 2.1$ ), 1.97 (ddd, 1H, C4-H,  $J = 13.4, 10.4, 6.1$ ), 1.88 (brs, 1H, C-OH), 1.75 (dtd, 1H, C6-H,  $J = 14.0, 6.8, 4.7$ ), 1.66–1.65 (brs, 1H, C-OH). <sup>1</sup>H-NMR (500 MHz, CD<sub>3</sub>OD):  $\delta$  7.39–7.32 (m, 3H), 7.30–7.29 (m, 1H), 5.15 (d, 1H,  $J = 14.9$ ), 5.10 (d, 1H,  $J = 14.9$ ), 4.22 (dtd, 1H,  $J = 9.8, 5.8, 2.1$ ), 4.15 (ddd, 1H,  $J = 10.5, 9.3, 4.9$ ), 3.76 (d, 1H,  $J = 9.1$ ), 3.64 (ddd, 2H,  $J = 7.2, 5.6, 1.8$ ), 2.36 (ddt, 1H,  $J = 13.7, 9.9, 5.7$ ), 2.11 (ddd, 1H,  $J = 13.3, 5.0, 2.3$ ), 2.01 (ddd, 1H,  $J = 13.3, 10.6, 6.2$ ), 1.74 (dtd, 1H,  $J = 13.8, 7.0, 5.4$ ). <sup>13</sup>C-NMR (125 MHz, CDCl<sub>3</sub>):  $\delta$  139.9, 138.7, 129.7, 128.3, 122.1, 121.2, 111.9, 76.6, 72.9, 72.4, 67.0, 60.9, 38.0, 36.3. ESI-MS  $m/z$  (rel int): (pos) 289.1 ([M+Na]<sup>+</sup>, 100); (neg) 265.1 ([M–H]<sup>–</sup>, 100).

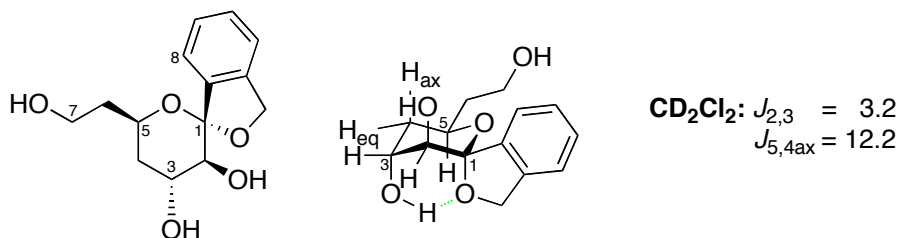

**(+)-(1*S*,3'*S*,4'*R*,6'*R*)-6'-(2-hydroxyethyl)-3',4',5',6'-tetrahydro-3*H*-spiro[isobenzofuran-1,2'-pyran]-3',4'-diol (8).** Clear oil (11 mg, 86%). **TLC:**  $R_f$  0.43 (20:1 EtOAc/MeOH).  $[\alpha]_D^{20}$ : +59.1° ( $c$  0.5,  $\text{CHCl}_3$ ). **IR** (NaCl, film): 3394 (O–H st), 3079, 3044, 2928, 2878, 1455, 1408, 1363, 1296, 1259, 1063 (C–O st), 1009, 964, 913, 758, 729.  **$^1\text{H-NMR}$**  (500 MHz,  $\text{CD}_2\text{Cl}_2$ ):  $\delta$  7.59 (dd, 1H, Ar-H,  $J = 7.6, 0.2$ ), 7.38 (td, 1H, Ar-H,  $J = 7.5, 1.1$ ), 7.32–7.27 (m, 2H, Ar-H), 5.20 (d, C12-H,  $J = 12.5, 1\text{H}$ ), 5.12 (d, 1H, C12-H,  $J = 12.5$ ), 4.55 (dddd, 1H, C5-H,  $J = 12.2, 8.4, 3.9, 2.6$ ), 3.97 (ddd, 1H, C3-H,  $J = 10.2, 6.1, 3.2$ ), 3.88 (d, 1H, C3-OH,  $J = 10.4$ ), 3.72–3.70 (m, 1H, C2-H), 3.66 (app q, 2H, C7-H,  $J = 5.1$ ), 2.18 (d, 1H, C2-OH,  $J = 7.4$ ), 2.01 (ddd, 1H, C4-H,  $J = 14.3, 12.2, 3.2$ ), 1.93 (brs, 1H, C7-OH), 1.82–1.74 (m, 1H, C6-H), 1.74–1.68 (m, 2H, C4-H, C6-H).  **$^1\text{H-NMR}$**  (500 MHz,  $\text{CDCl}_3$ ):  $\delta$  7.62 (d, 1H,  $J = 7.6$ ), 7.39 (t, 1H,  $J = 7.5$ ), 7.32 (t, 1H,  $J = 7.5$ ), 7.27 (m, 1H), 5.24 (d, 1H,  $J = 12.4$ ), 5.14 (d, 1H,  $J = 12.5$ ), 4.56 (ddt, 1H,  $J = 11.9, 8.7, 3.1$ ), 4.07–4.02 (m, 2H), 3.75 (m, 3H), 2.28 (d, 1H,  $J = 7.6$ ), 2.21 (t, 1H,  $J = 5.5$ ), 2.08 (td, 1H,  $J = 13.3, 2.6$ ), 1.90–1.83 (m, 1H), 1.80–1.74 (m, 2H).  **$^1\text{H-NMR}$**  (500 MHz,  $\text{CH}_3\text{OD}$ ):  $\delta$  7.68–7.66 (m, 1H), 7.38–7.35 (m, 1H), 7.30–7.27 (m, 2H), 5.15 (d, 1H,  $J = 17.5$ ), 5.10 (d, 1H,  $J = 17.5$ ), 4.51–4.46 (m, 1H), 3.99 (q, 1H,  $J = 3.1$ ), 3.65 (d, 1H,  $J = 2.9$ ), 3.60 (t, 2H,  $J = 6.5$ ), 2.07 (ddd, 1H,  $J = 14.1, 12.1, 3.4$ ), 1.79 (ddt, 1H,  $J = 14.0, 8.1, 6.0$ ), 1.71–1.64 (m, 2H).  **$^{13}\text{C-NMR}$**  (125 MHz,  $\text{CDCl}_3$ ):  $\delta$  138.9, 138.8, 129.8, 128.0, 124.5, 121.1, 109.8, 72.7, 69.5, 69.3, 67.5, 61.1, 37.7, 33.1. **ESI-MS**  $m/z$  (rel int): (pos) 289.0 ( $[\text{M}+\text{Na}]^+$ , 100); (neg) 265.0 ( $[\text{M}-\text{H}]^-$ , 100).



**VII. <sup>1</sup>H-NMR and <sup>13</sup>C-NMR spectra (S1, S2, 2, 4, 5, 7, 8)**

|                                                                                               |     |
|-----------------------------------------------------------------------------------------------|-----|
| A. Synthesis of sidechain precursors ( <b>S1a-i, S2</b> )                                     | S38 |
| B. Attachment of C1 sidechains via cross coupling reactions ( <b>2a-r</b> )                   | S48 |
| C. Spirocyclization with retention of configuration (Ti[Oi-Pr] <sub>4</sub> ) ( <b>4a-r</b> ) | S66 |
| D. Spirocyclization with inversion of configuration (MeOH or AcOH) ( <b>5a-r</b> )            | S84 |
| E. Desilylation of spiroketals ( <b>7, 8</b> )                                                | S97 |

**A. SYNTHESIS OF SIDECHAIN PRECURSORS (S1a-i, S2)**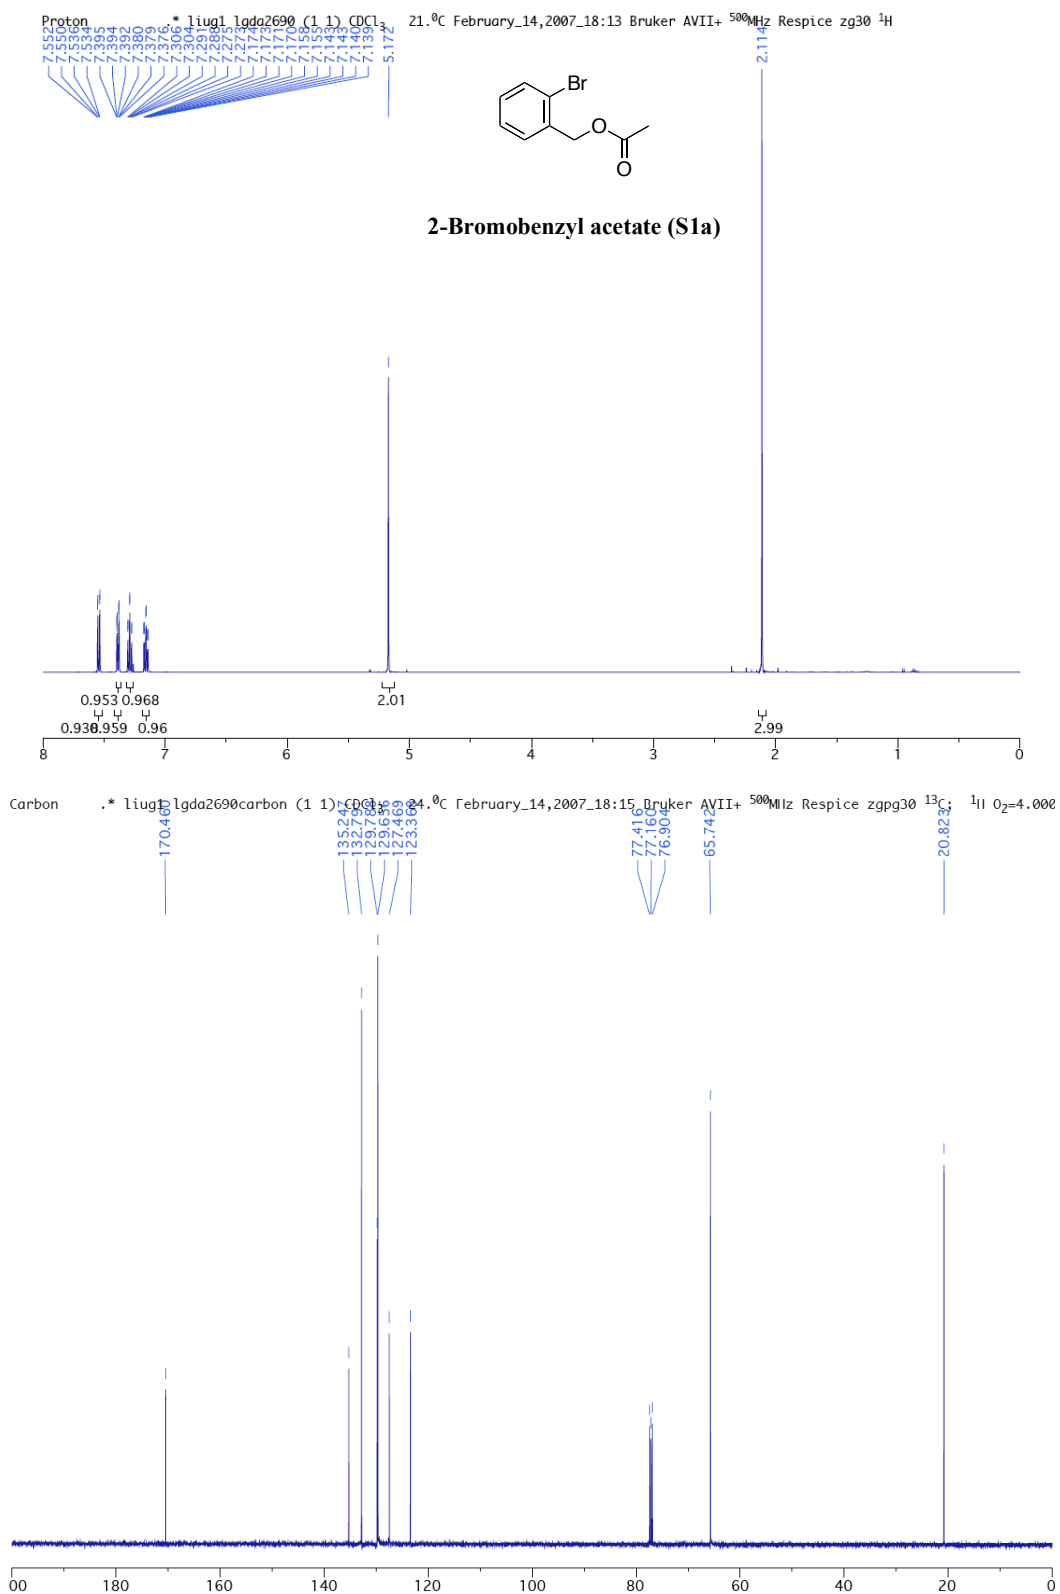

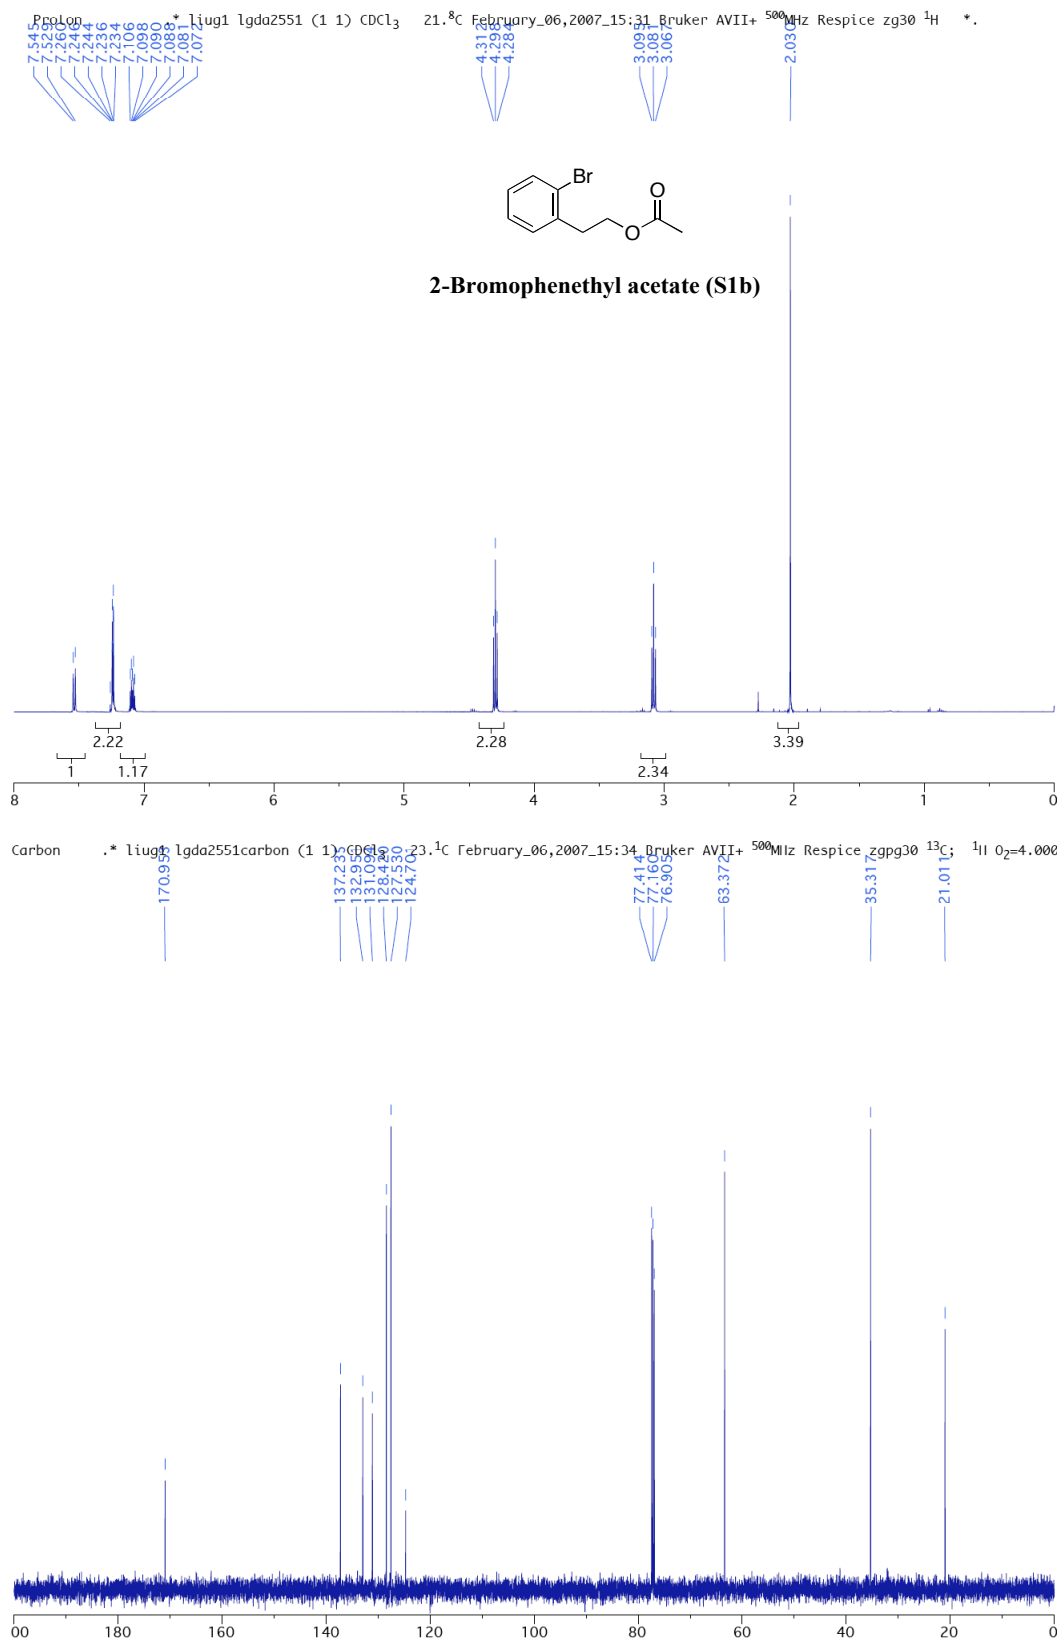

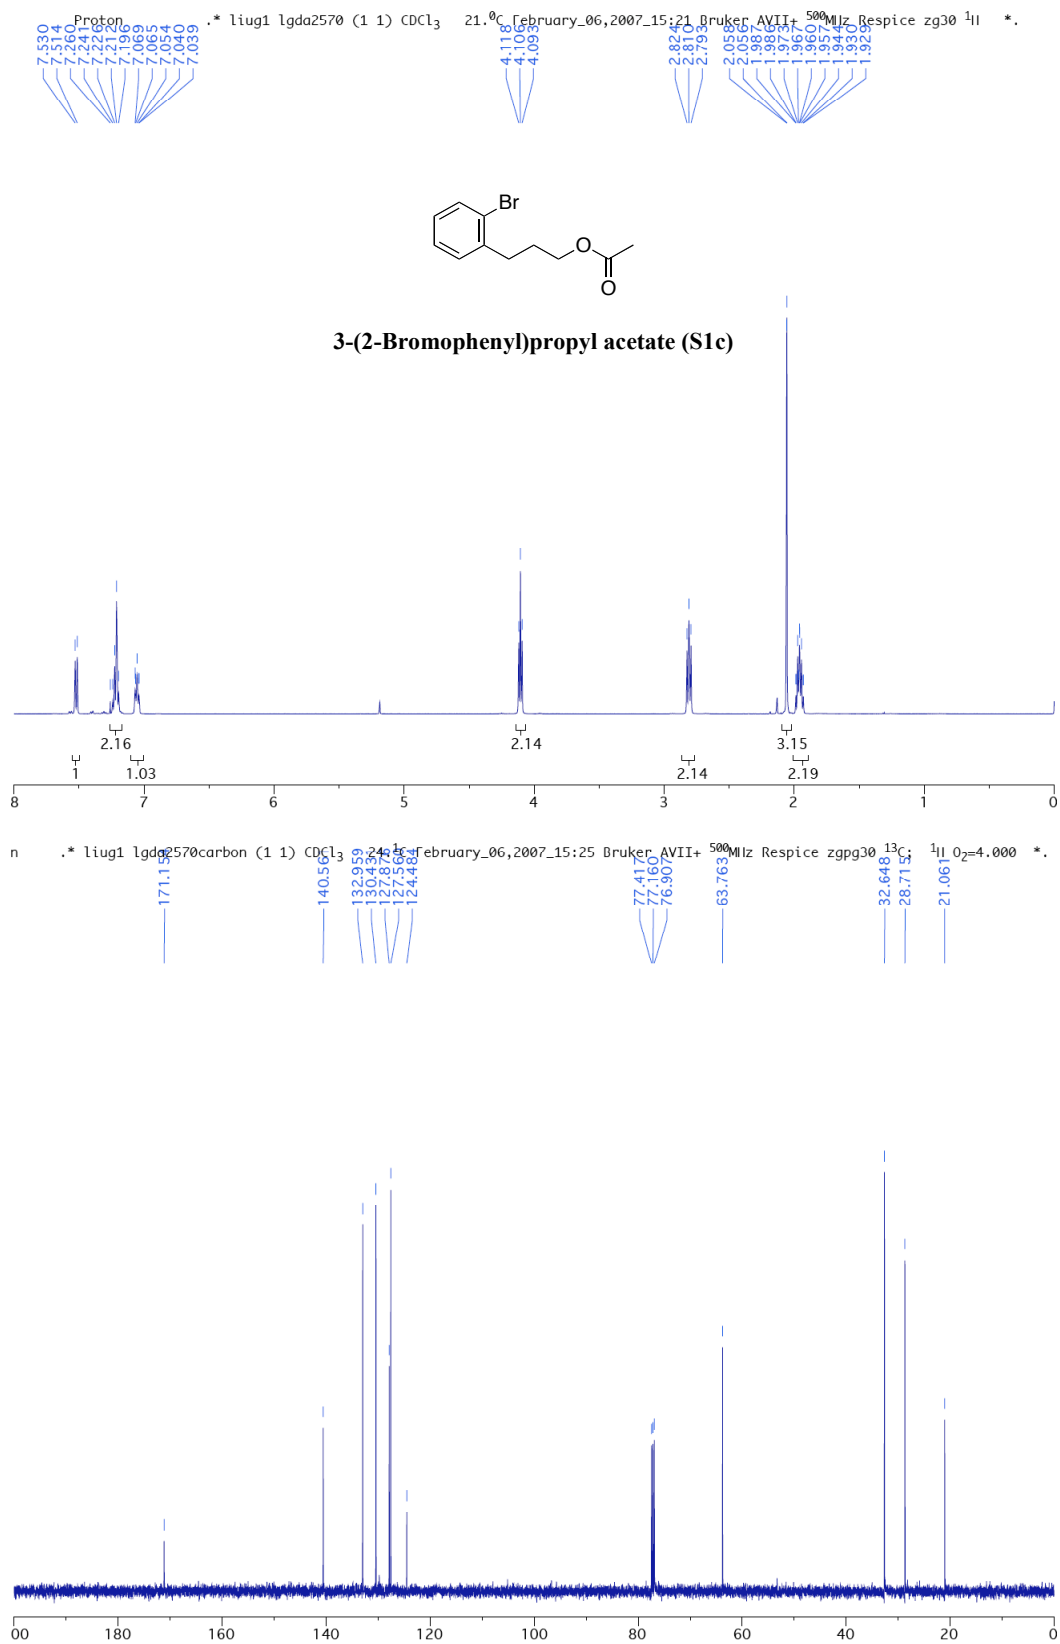

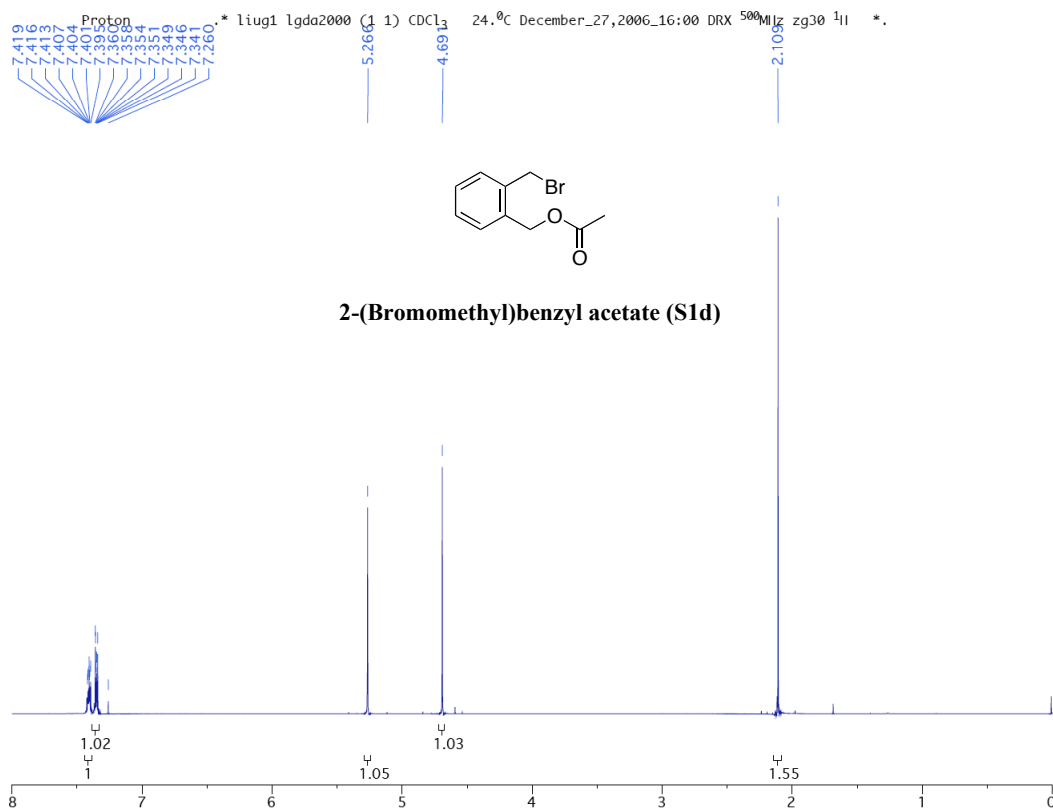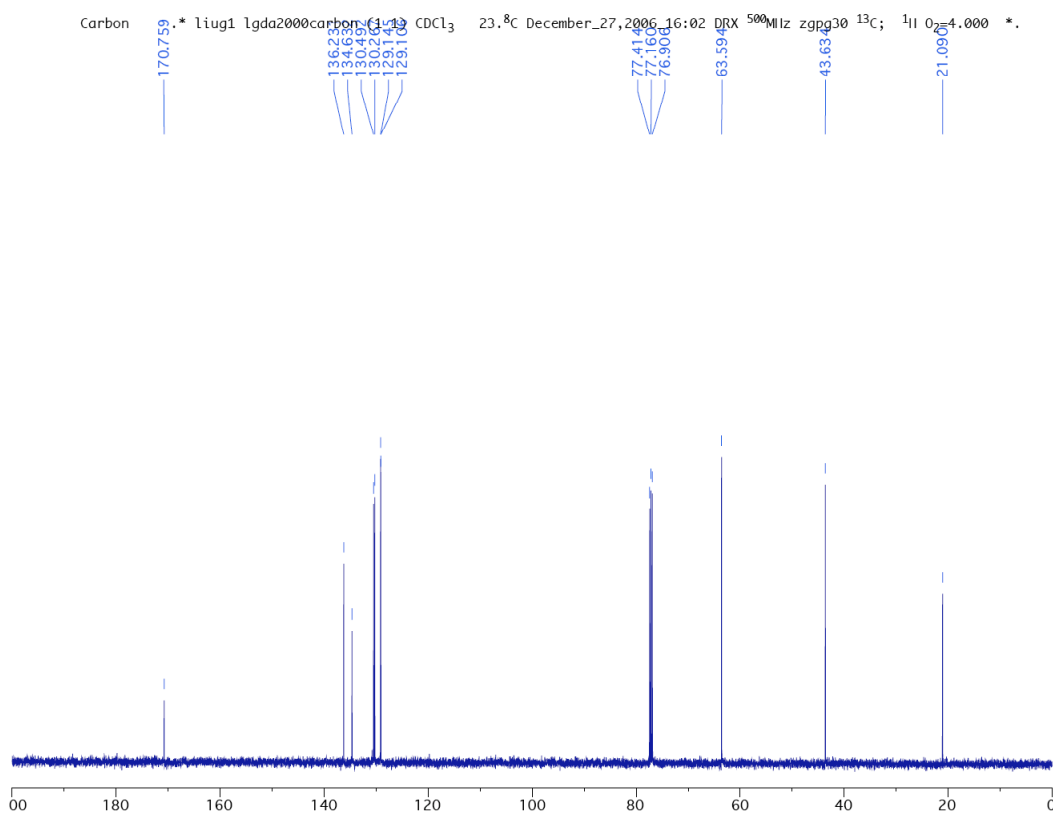





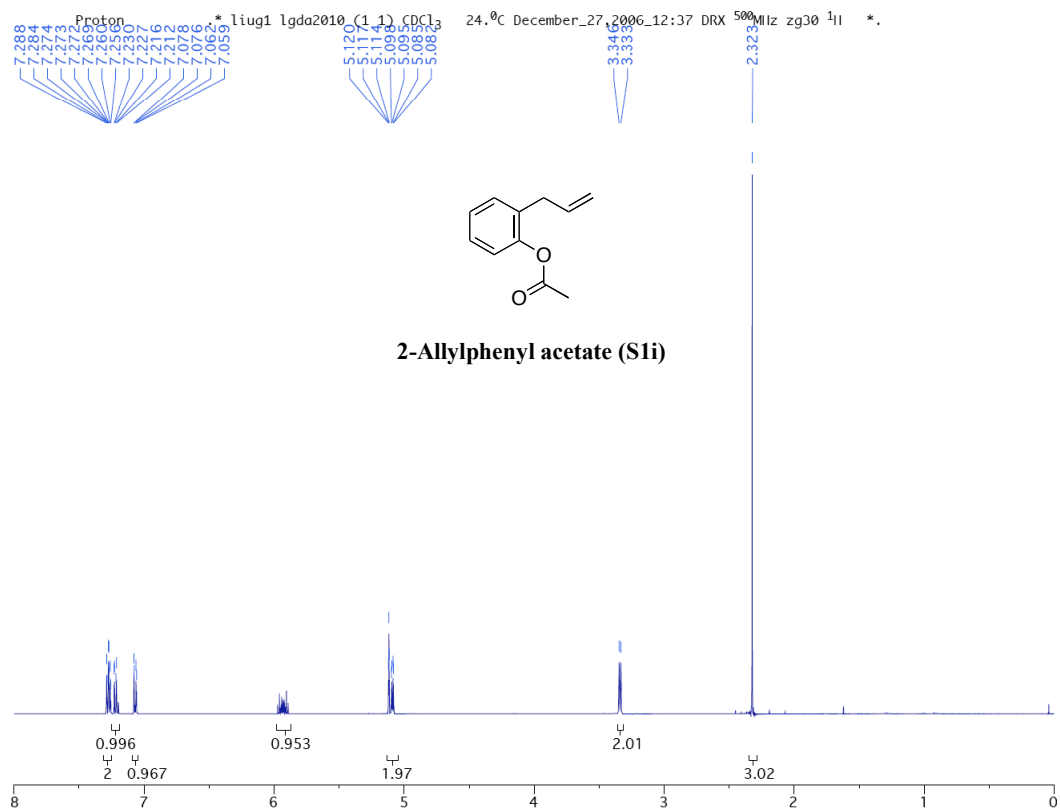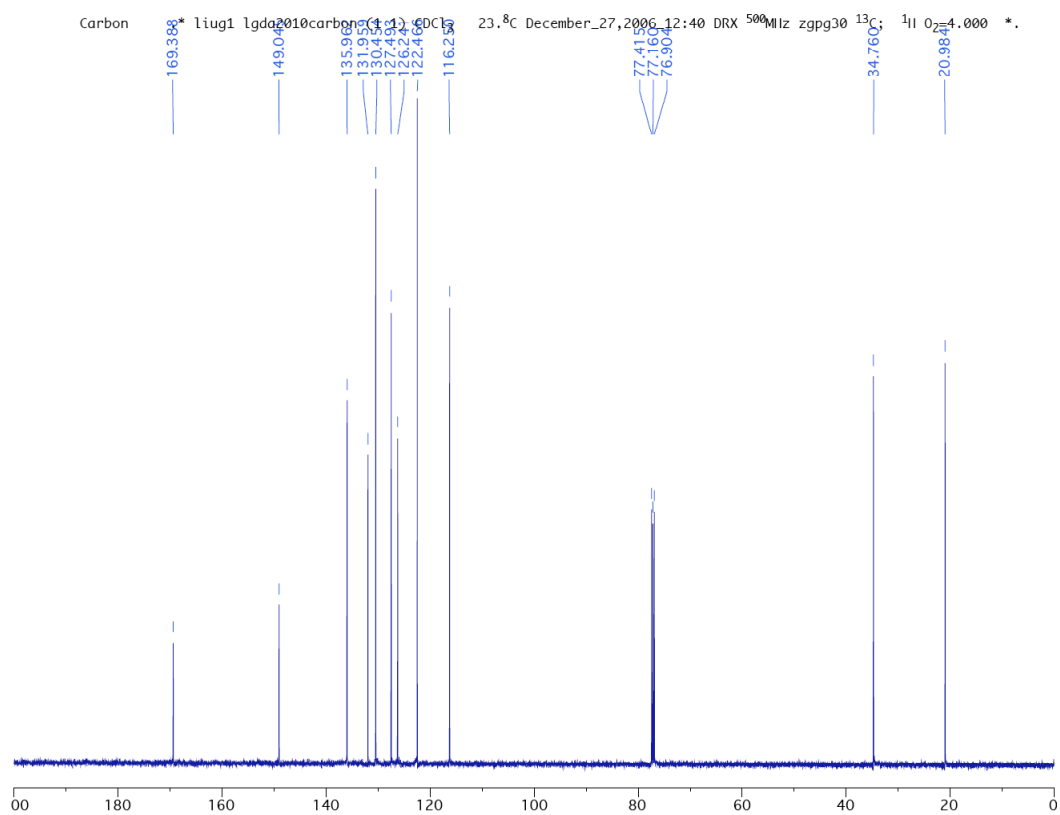



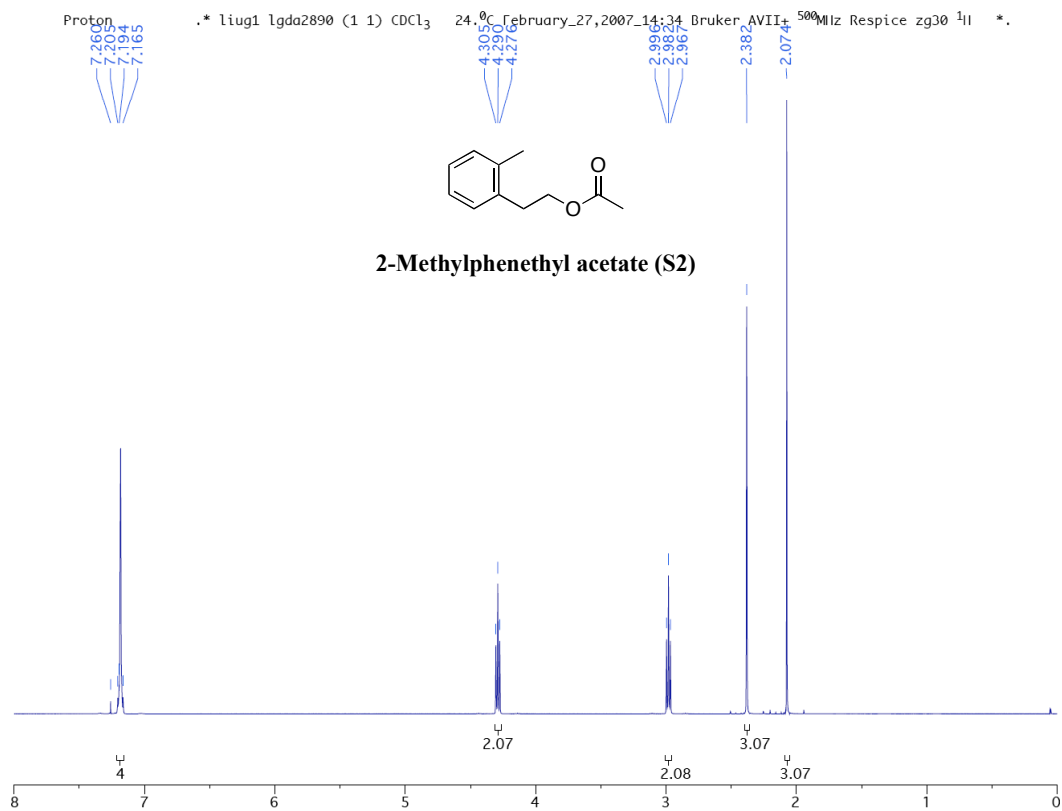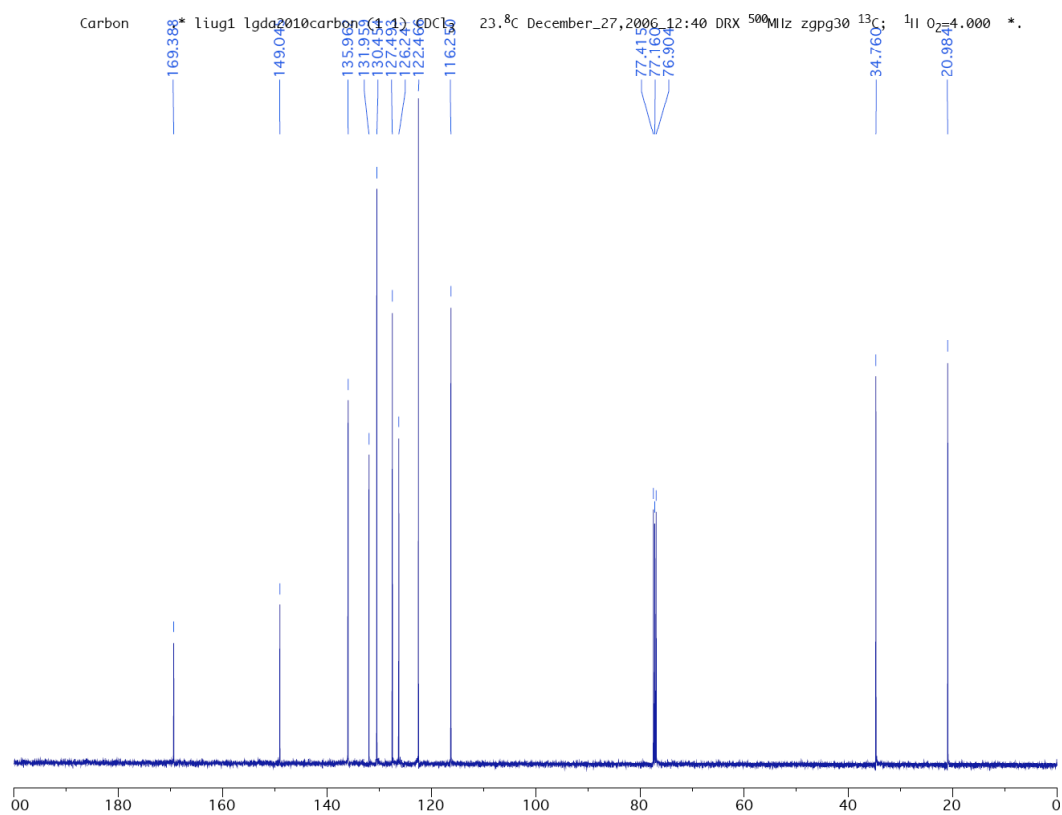





**B. ATTACHMENT OF C1 SIDECHAINS VIA CROSS COUPLING REACTIONS (2a-r)**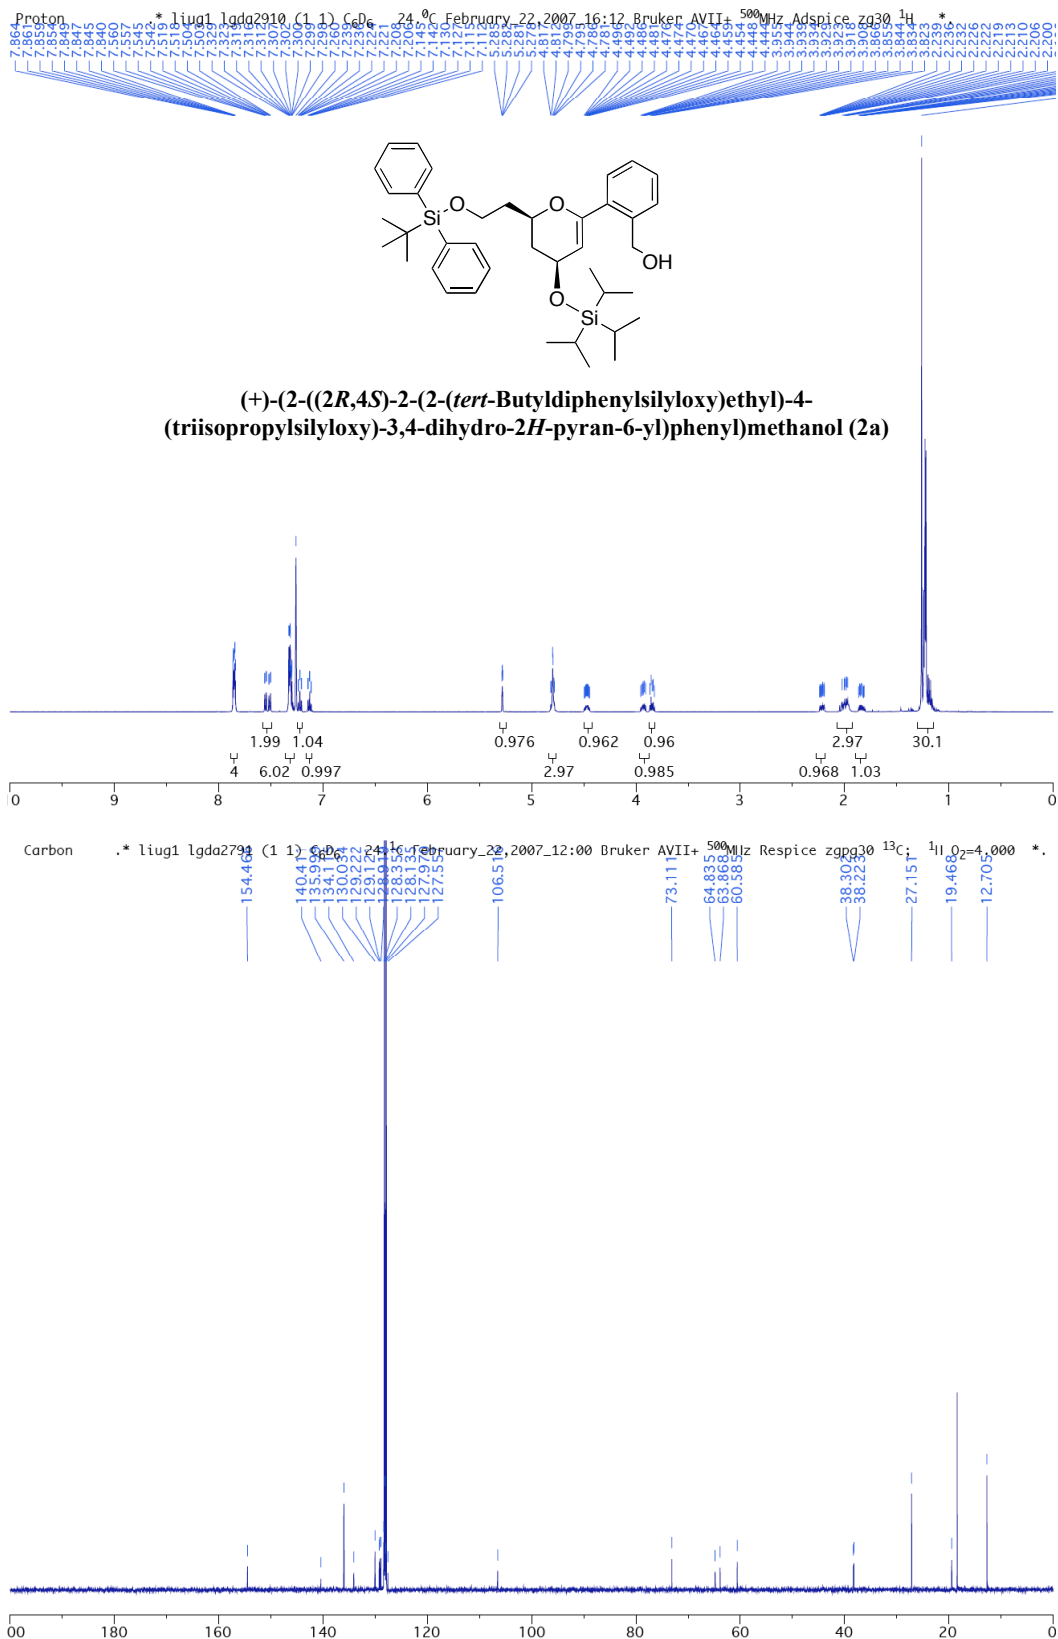

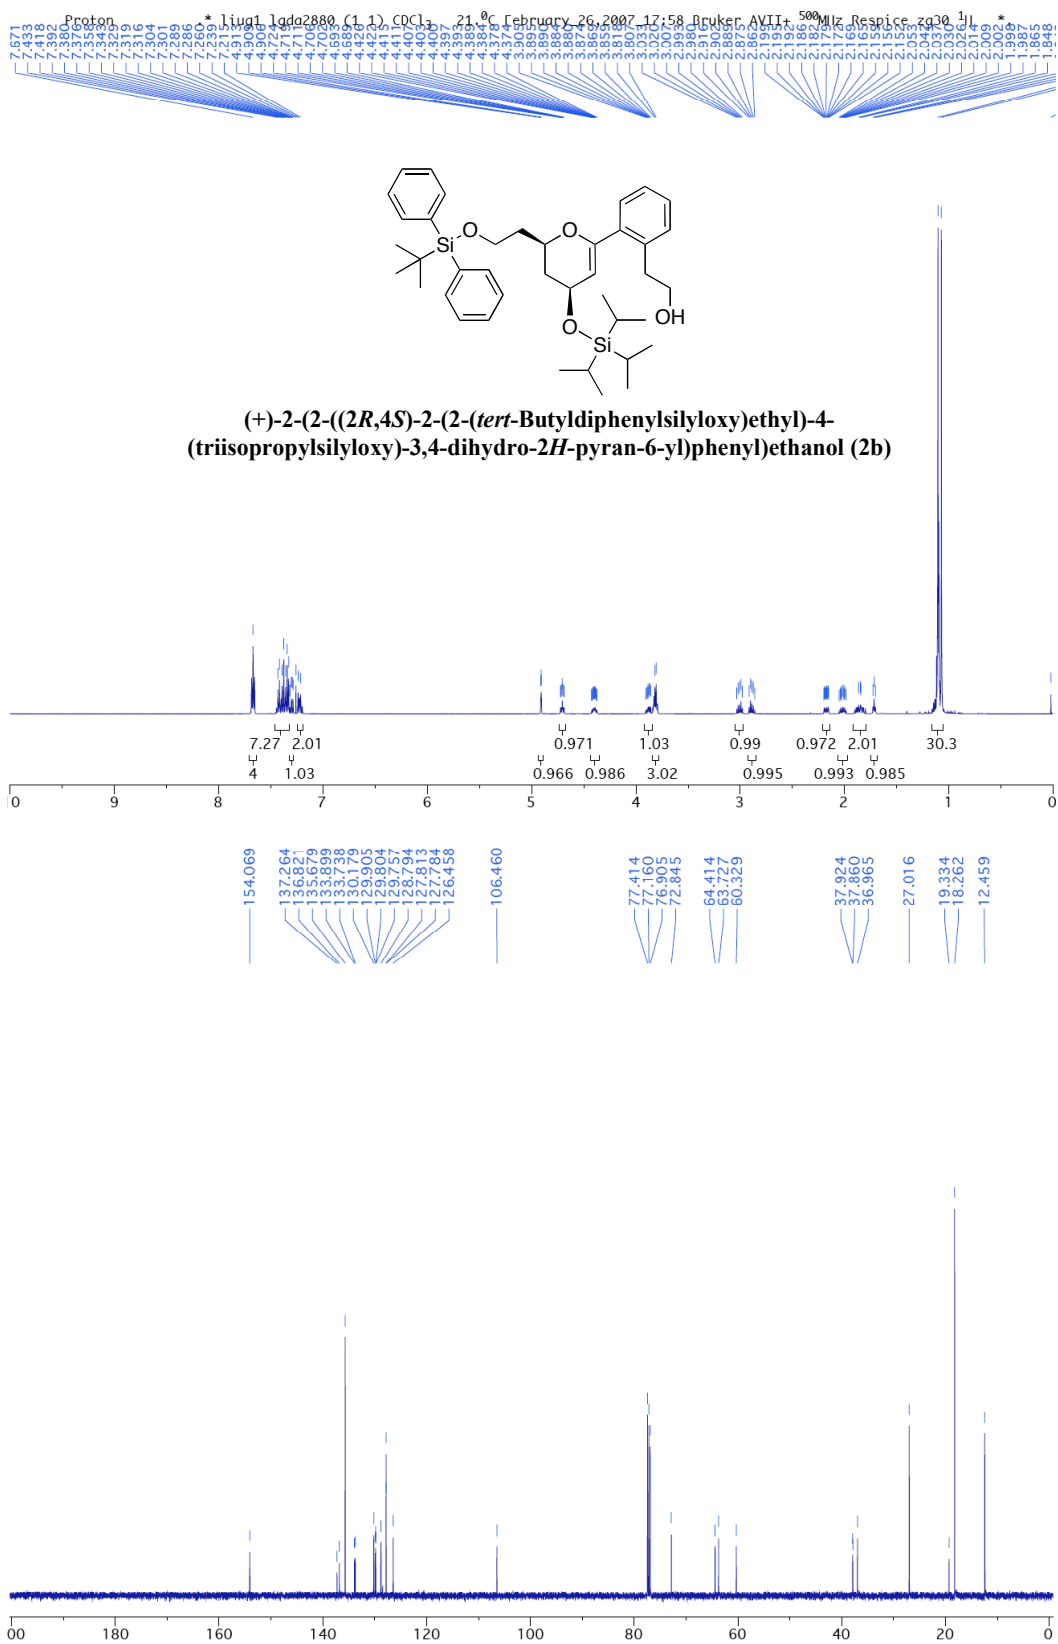

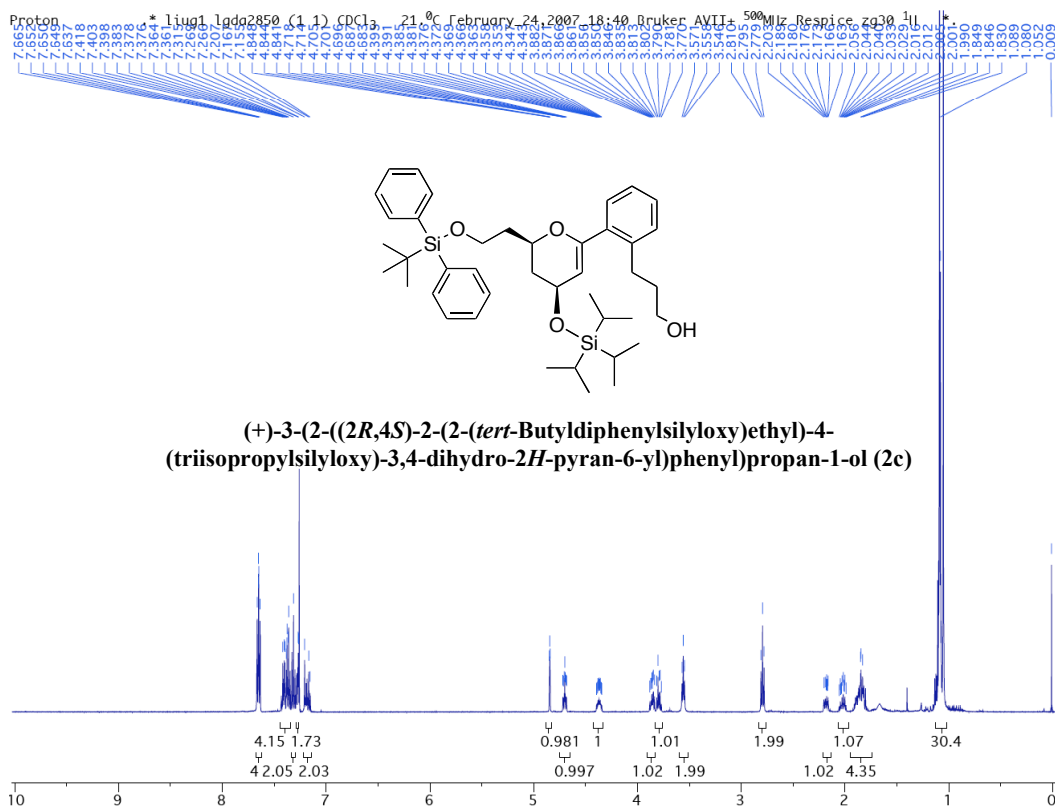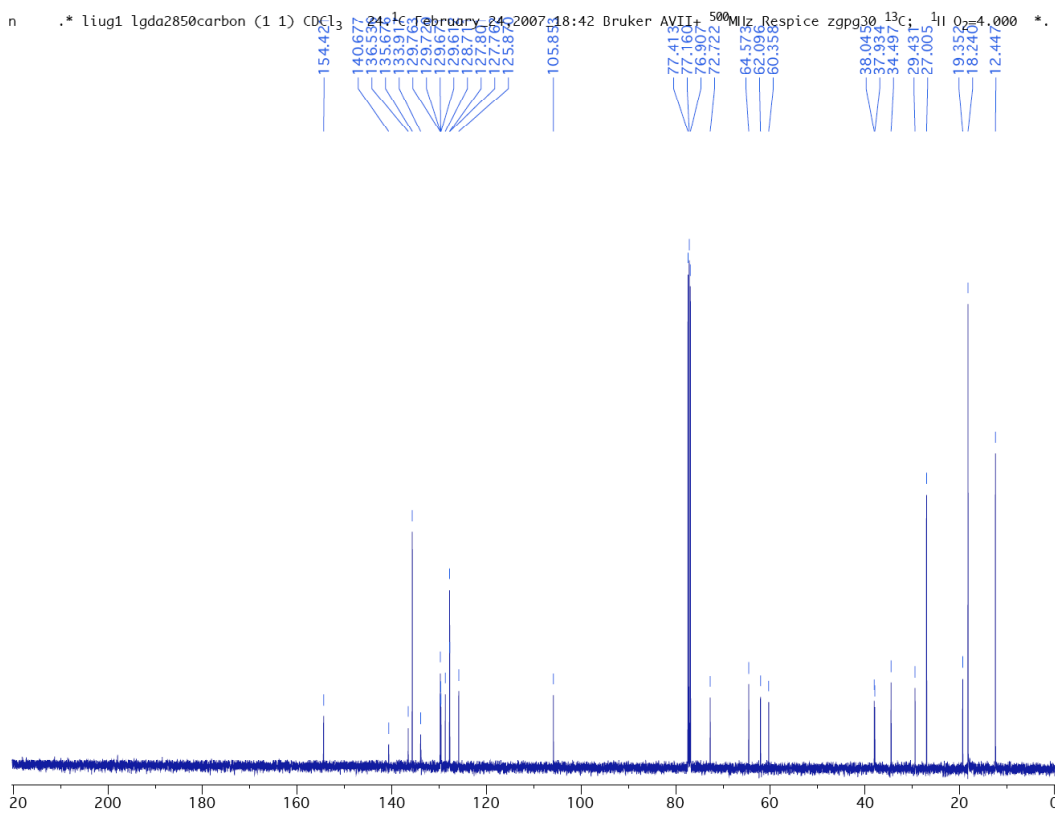



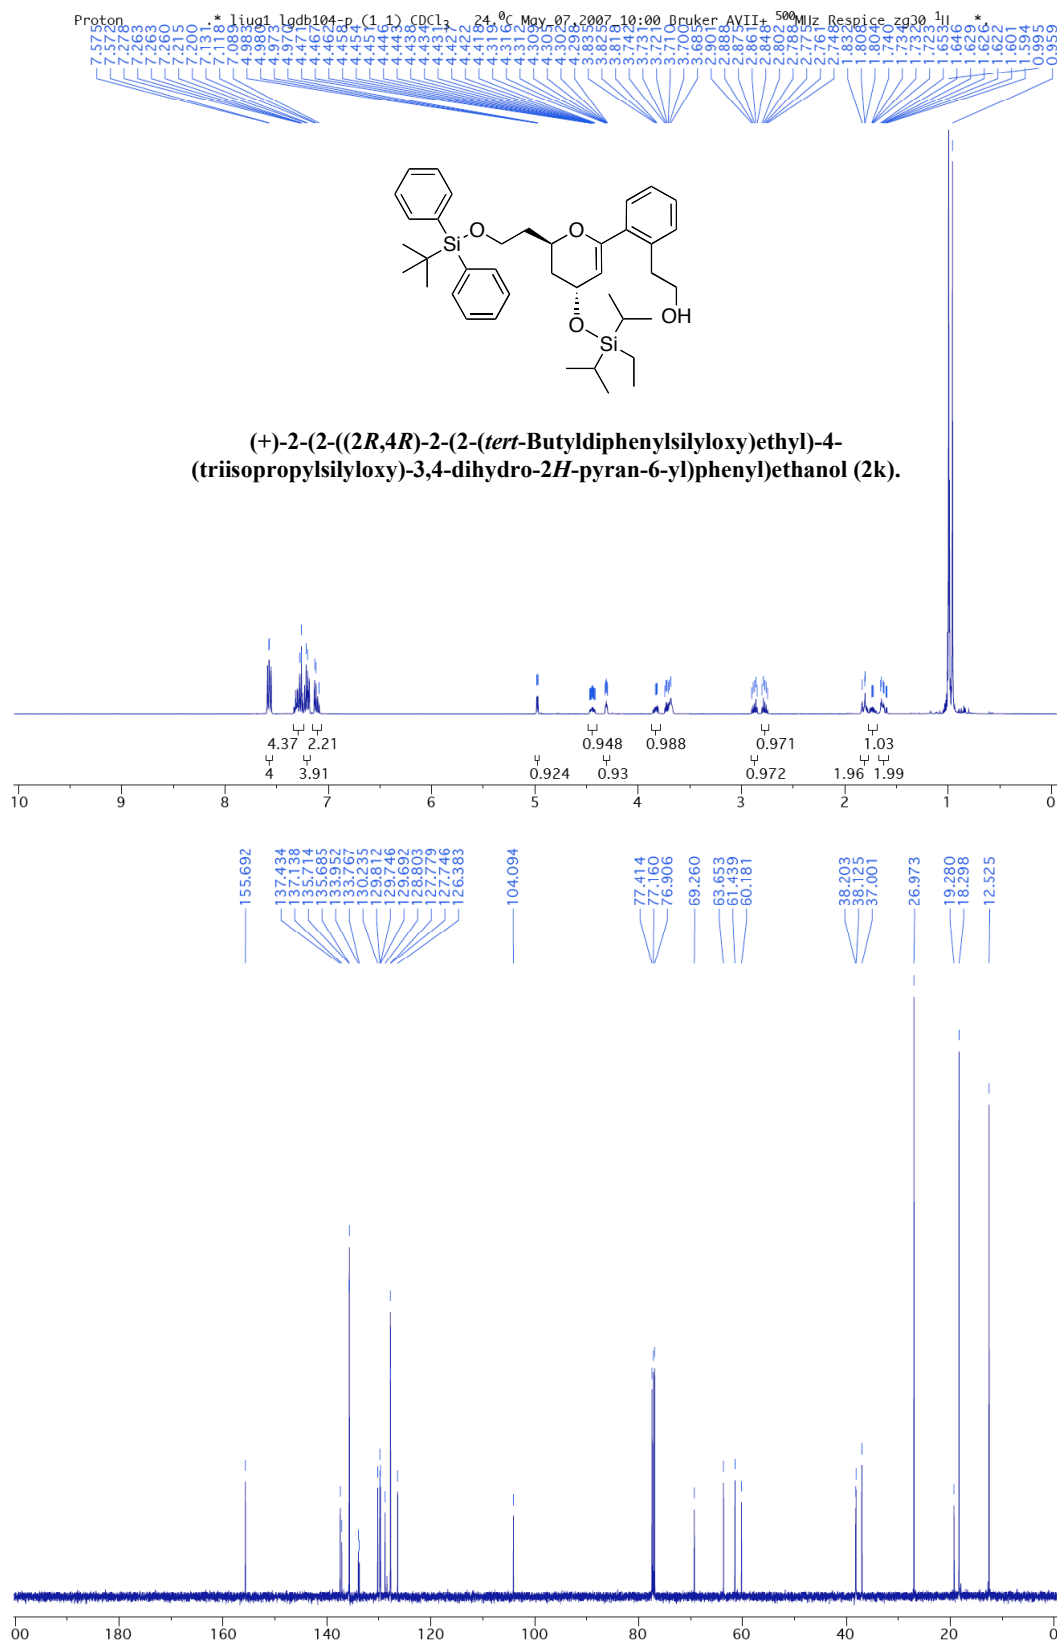



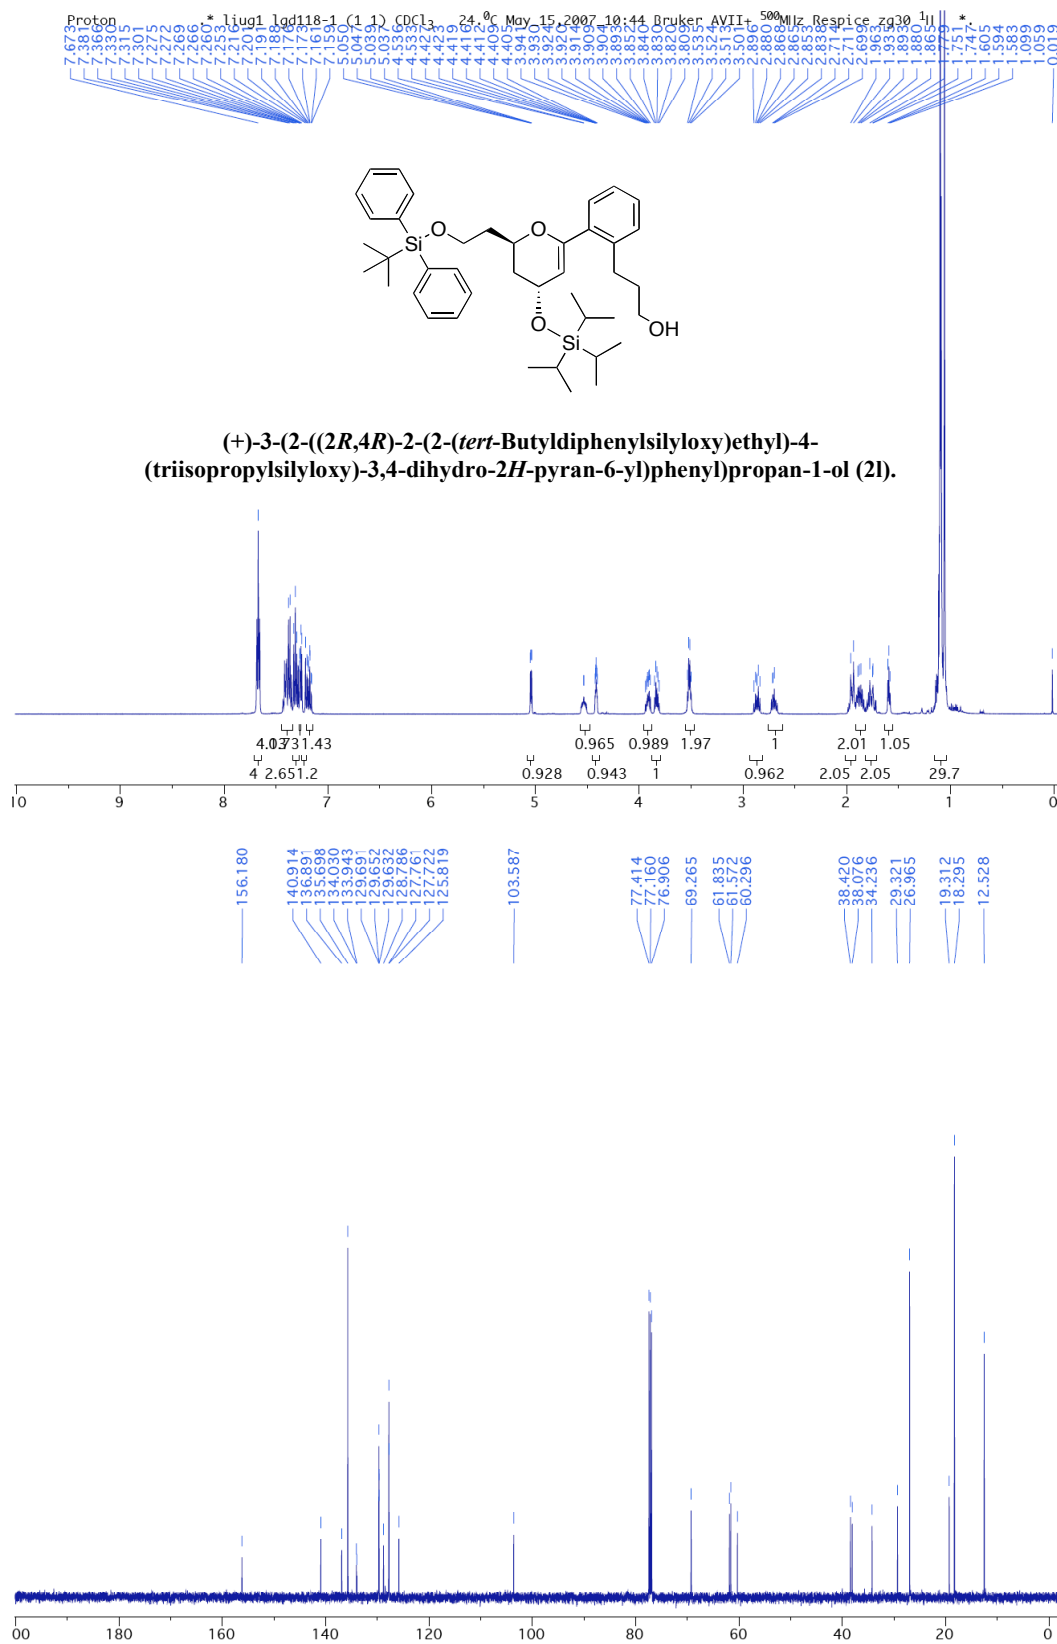

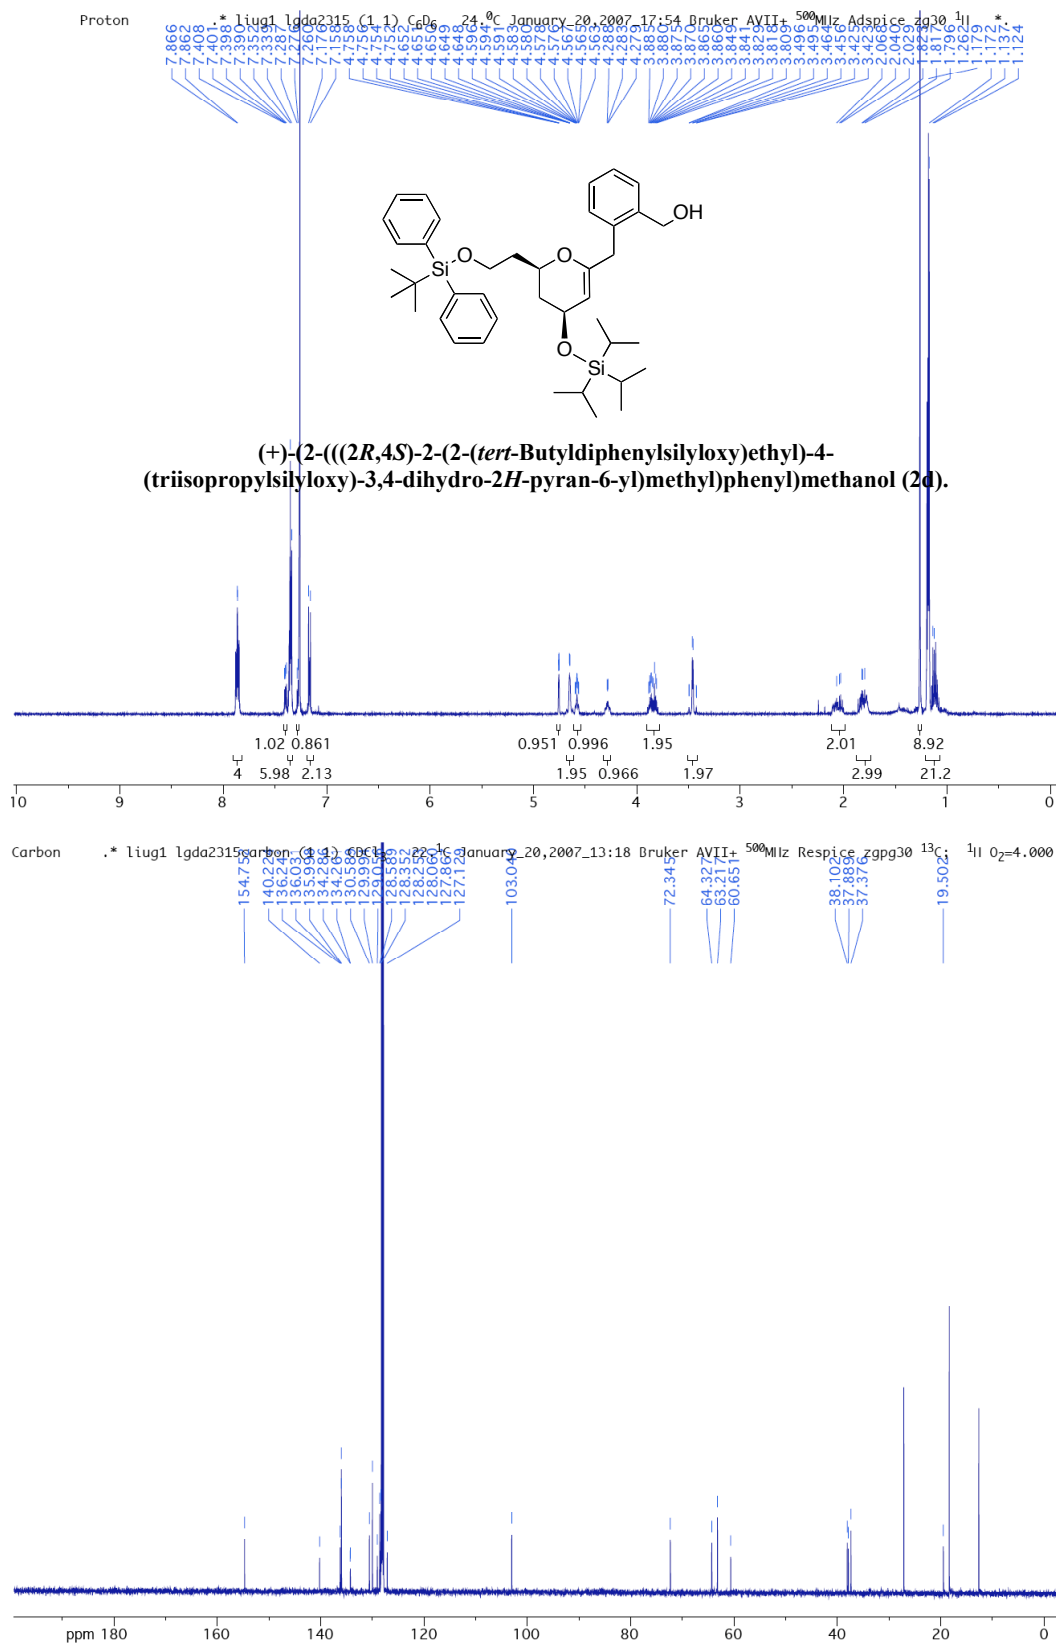

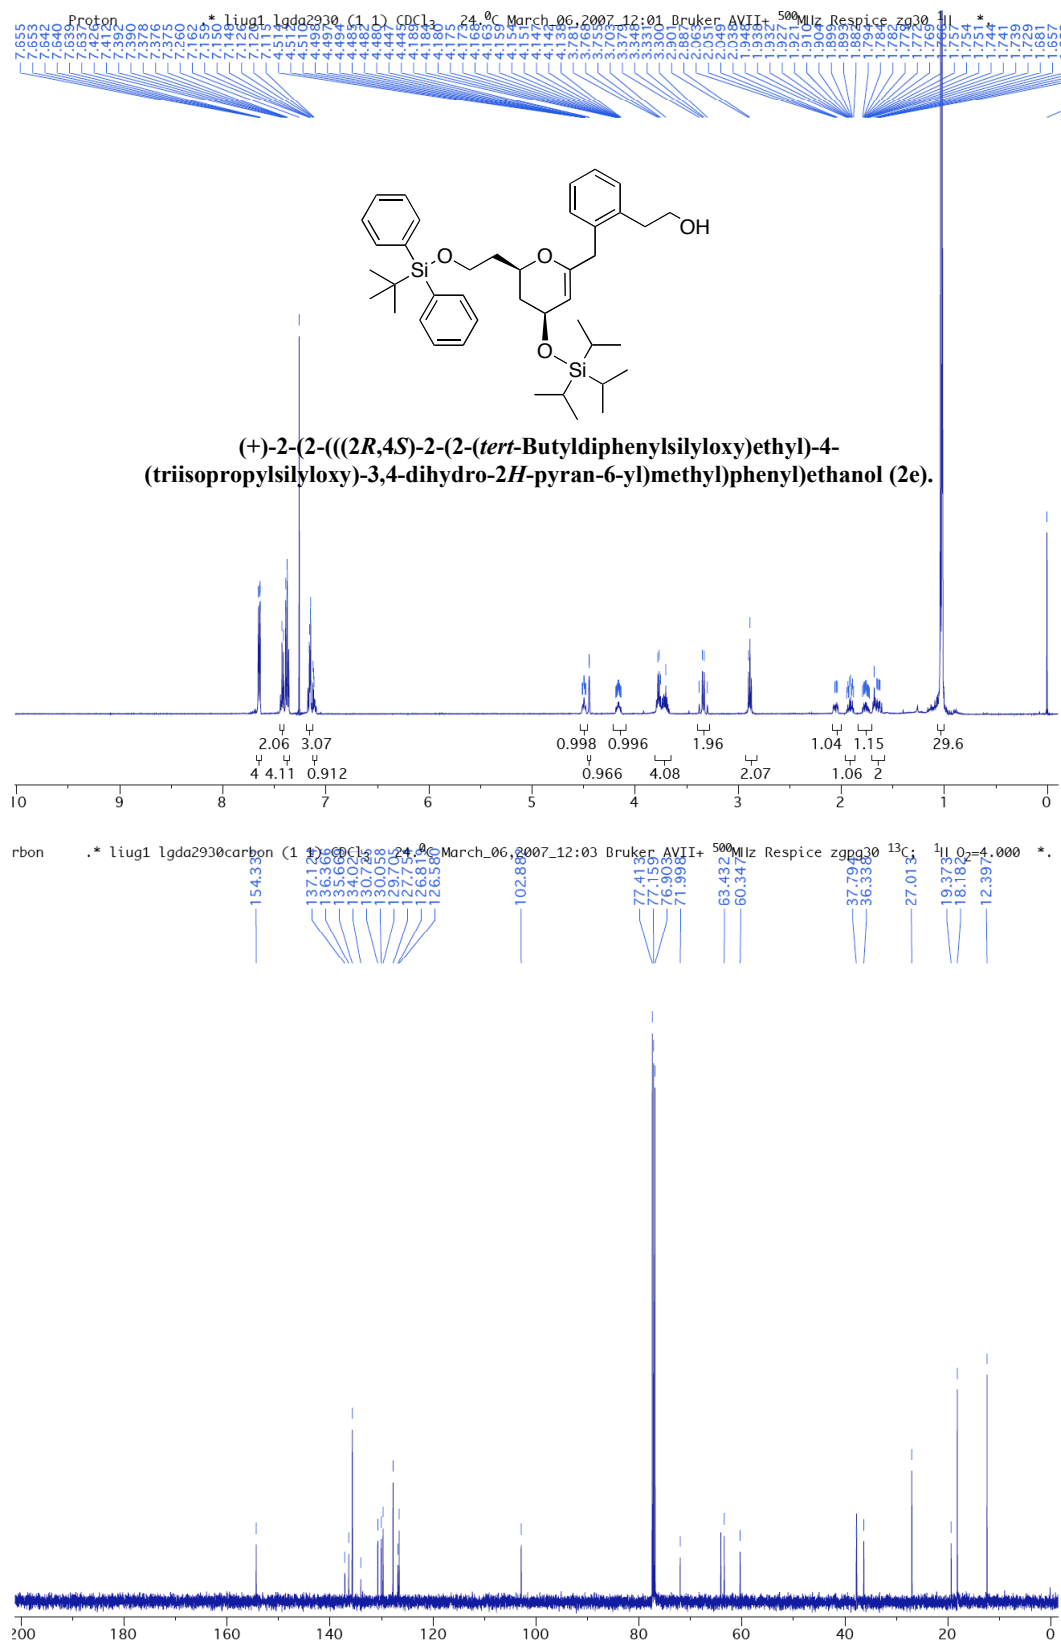







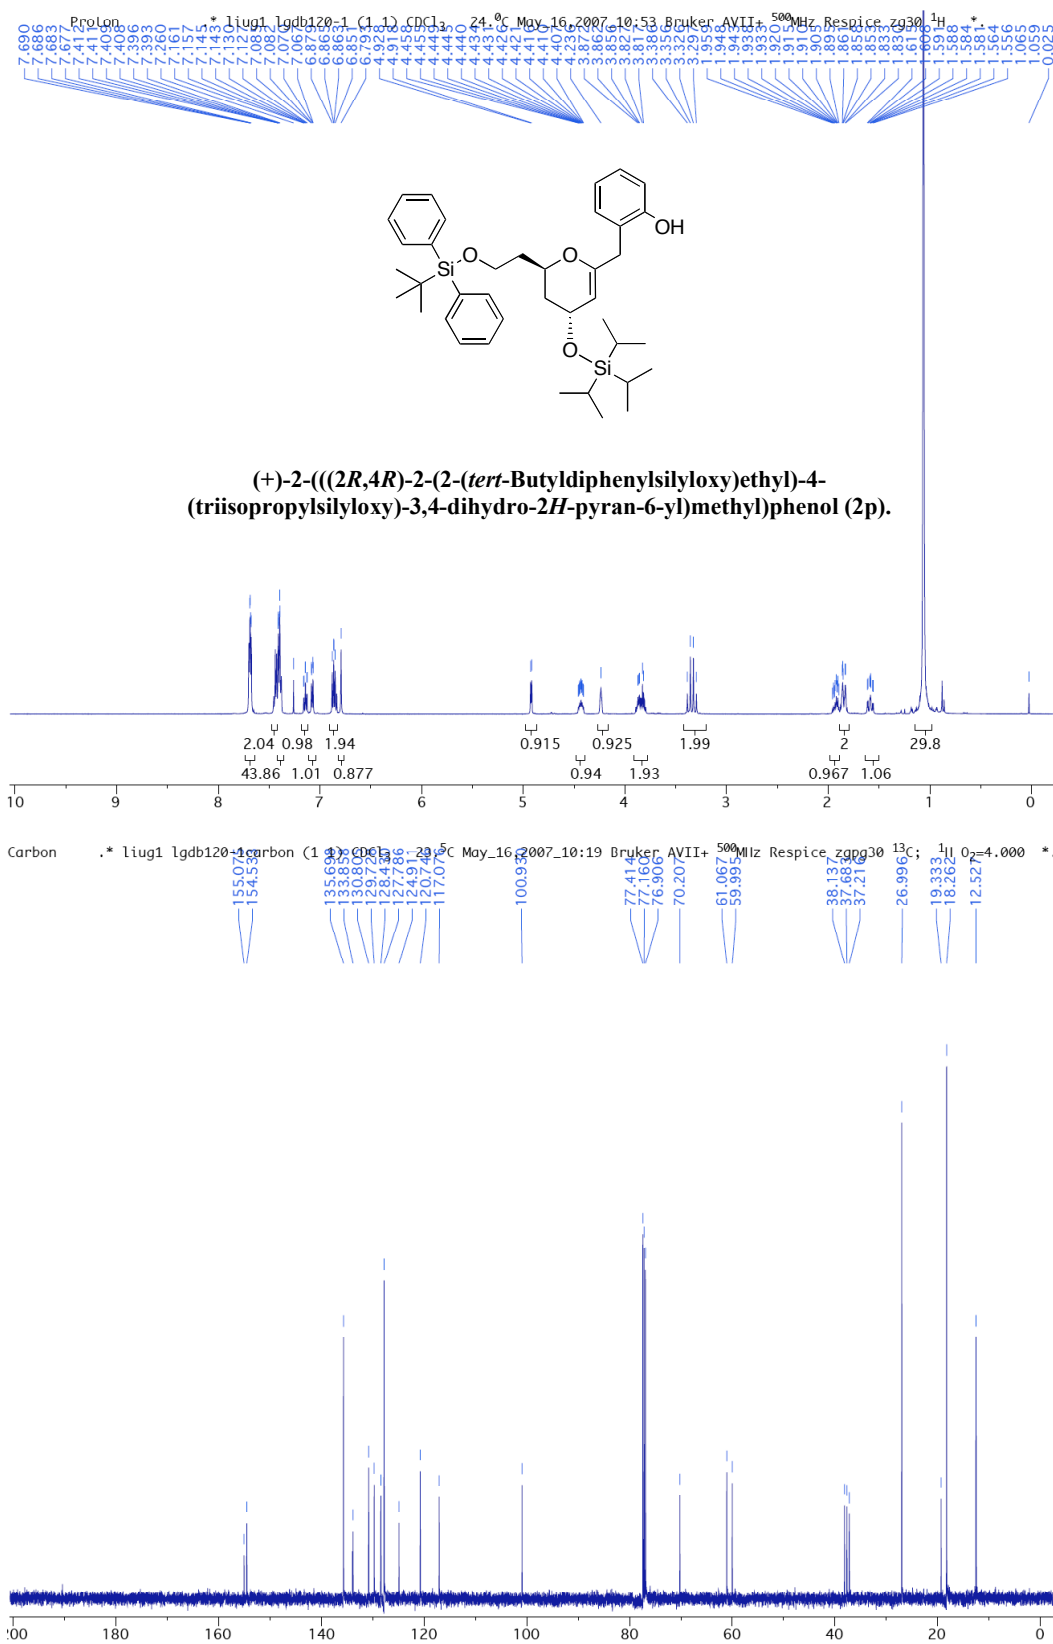

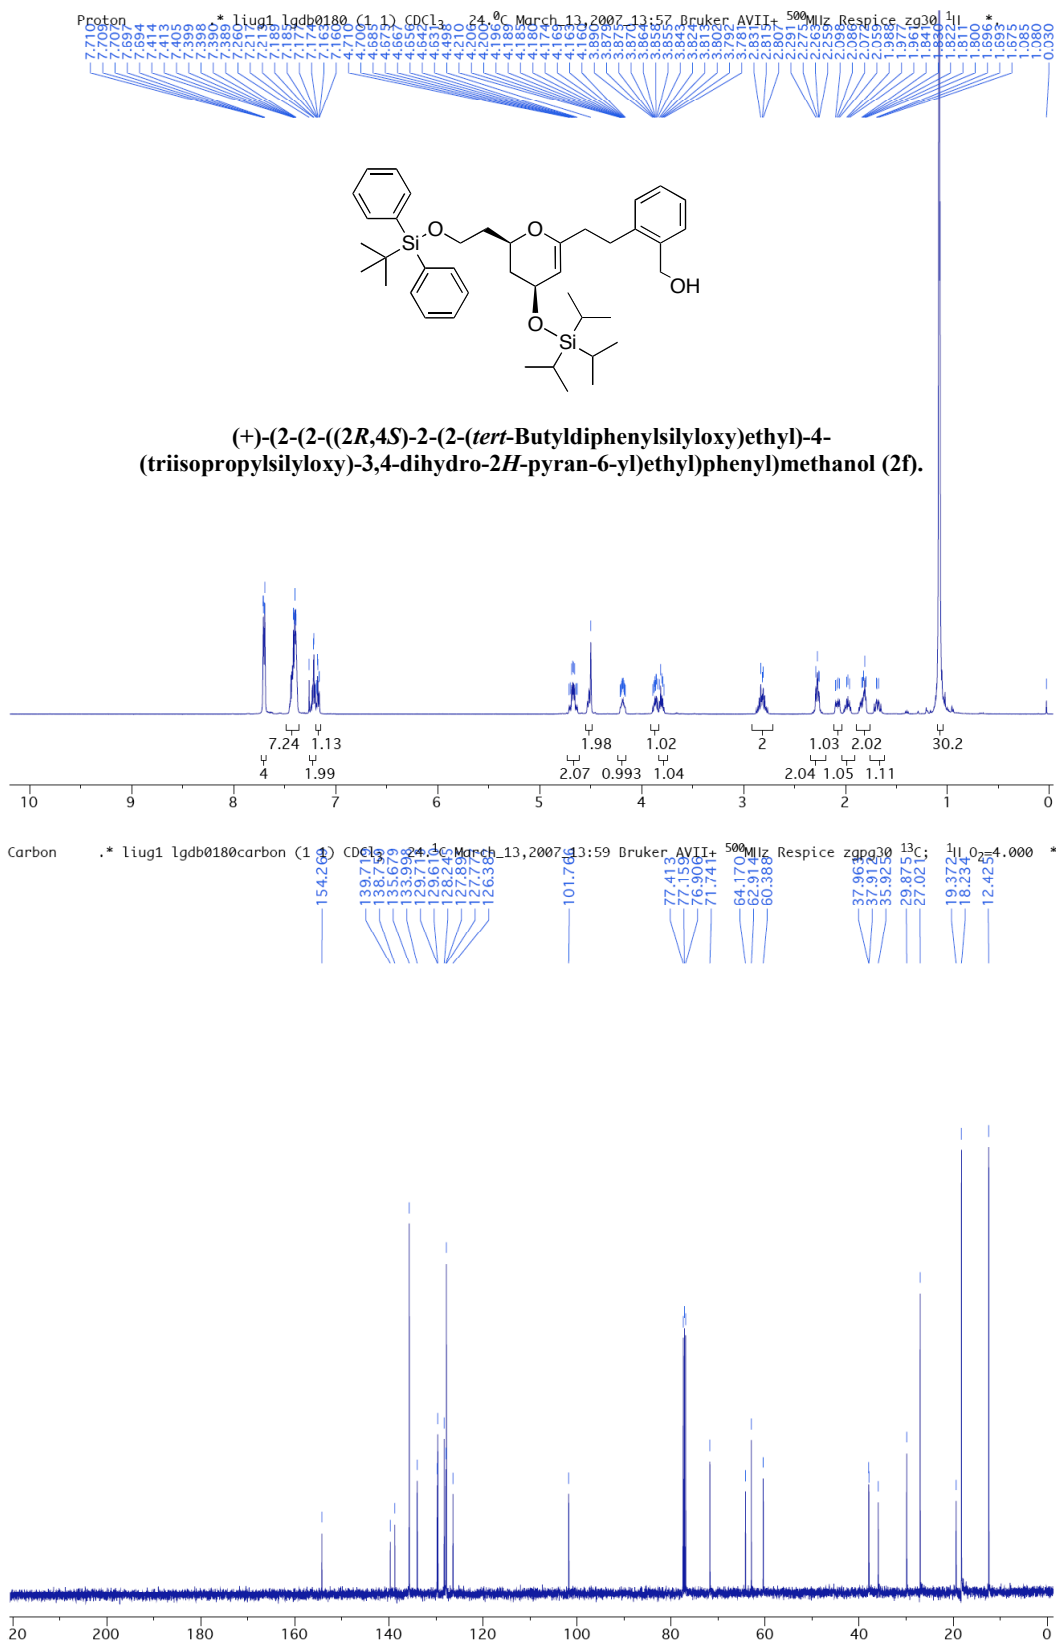



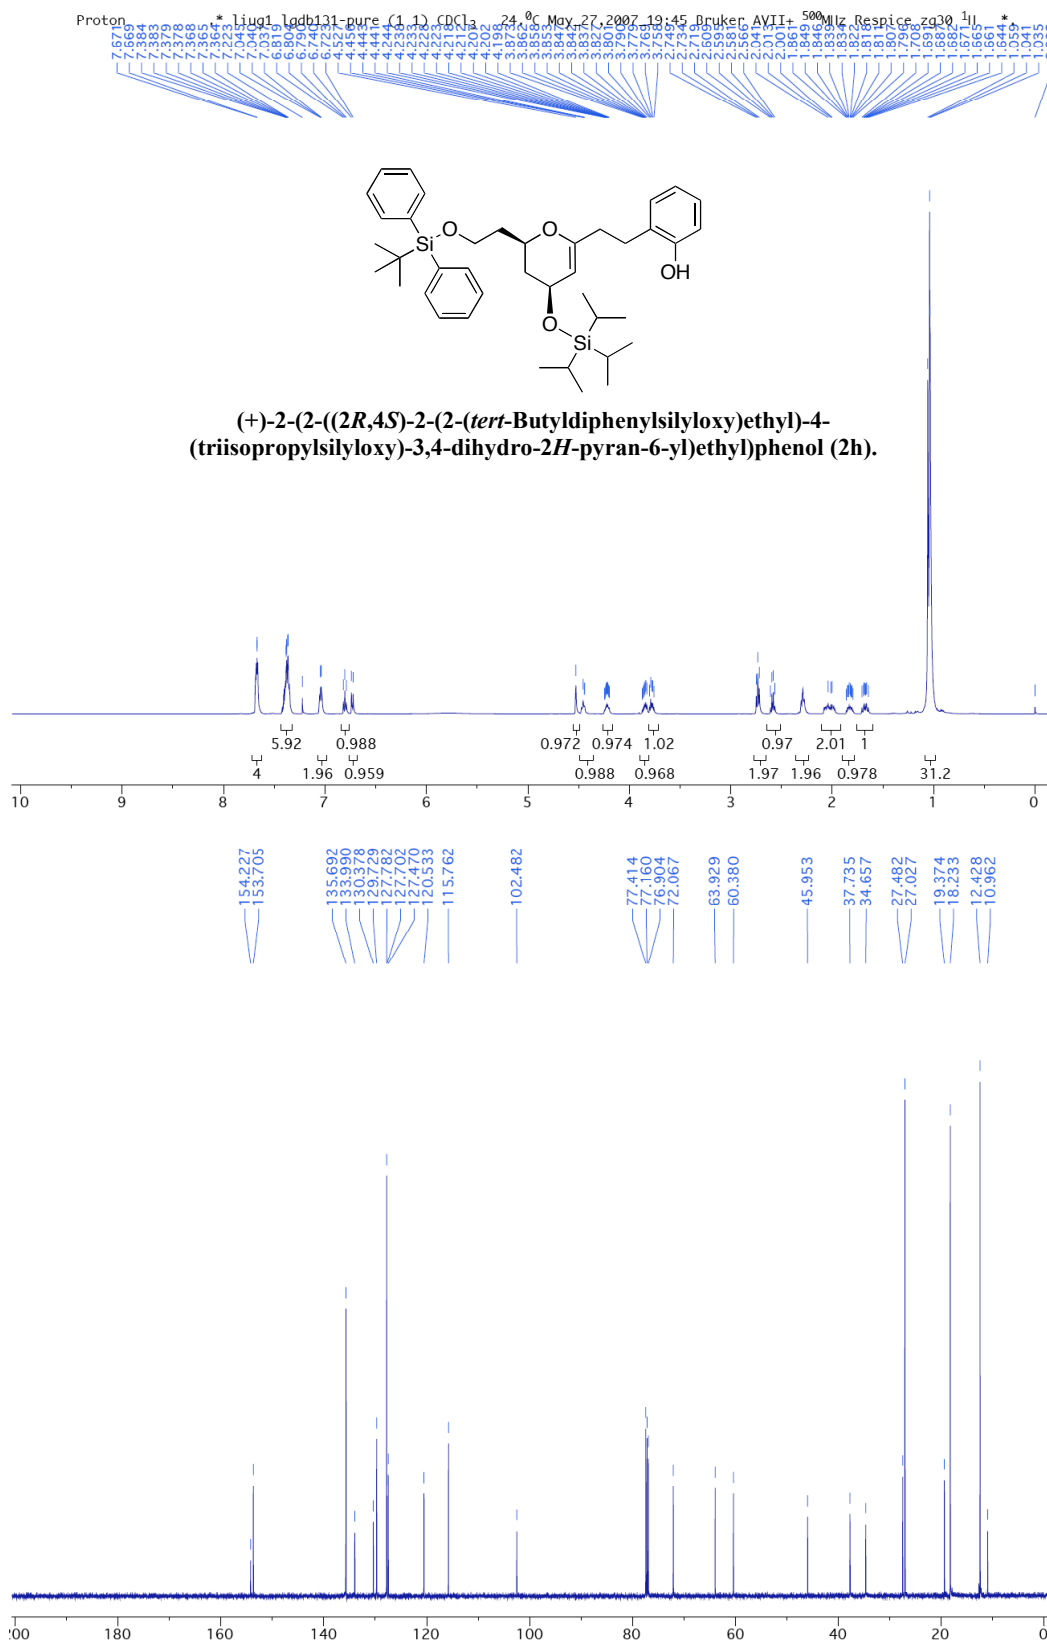

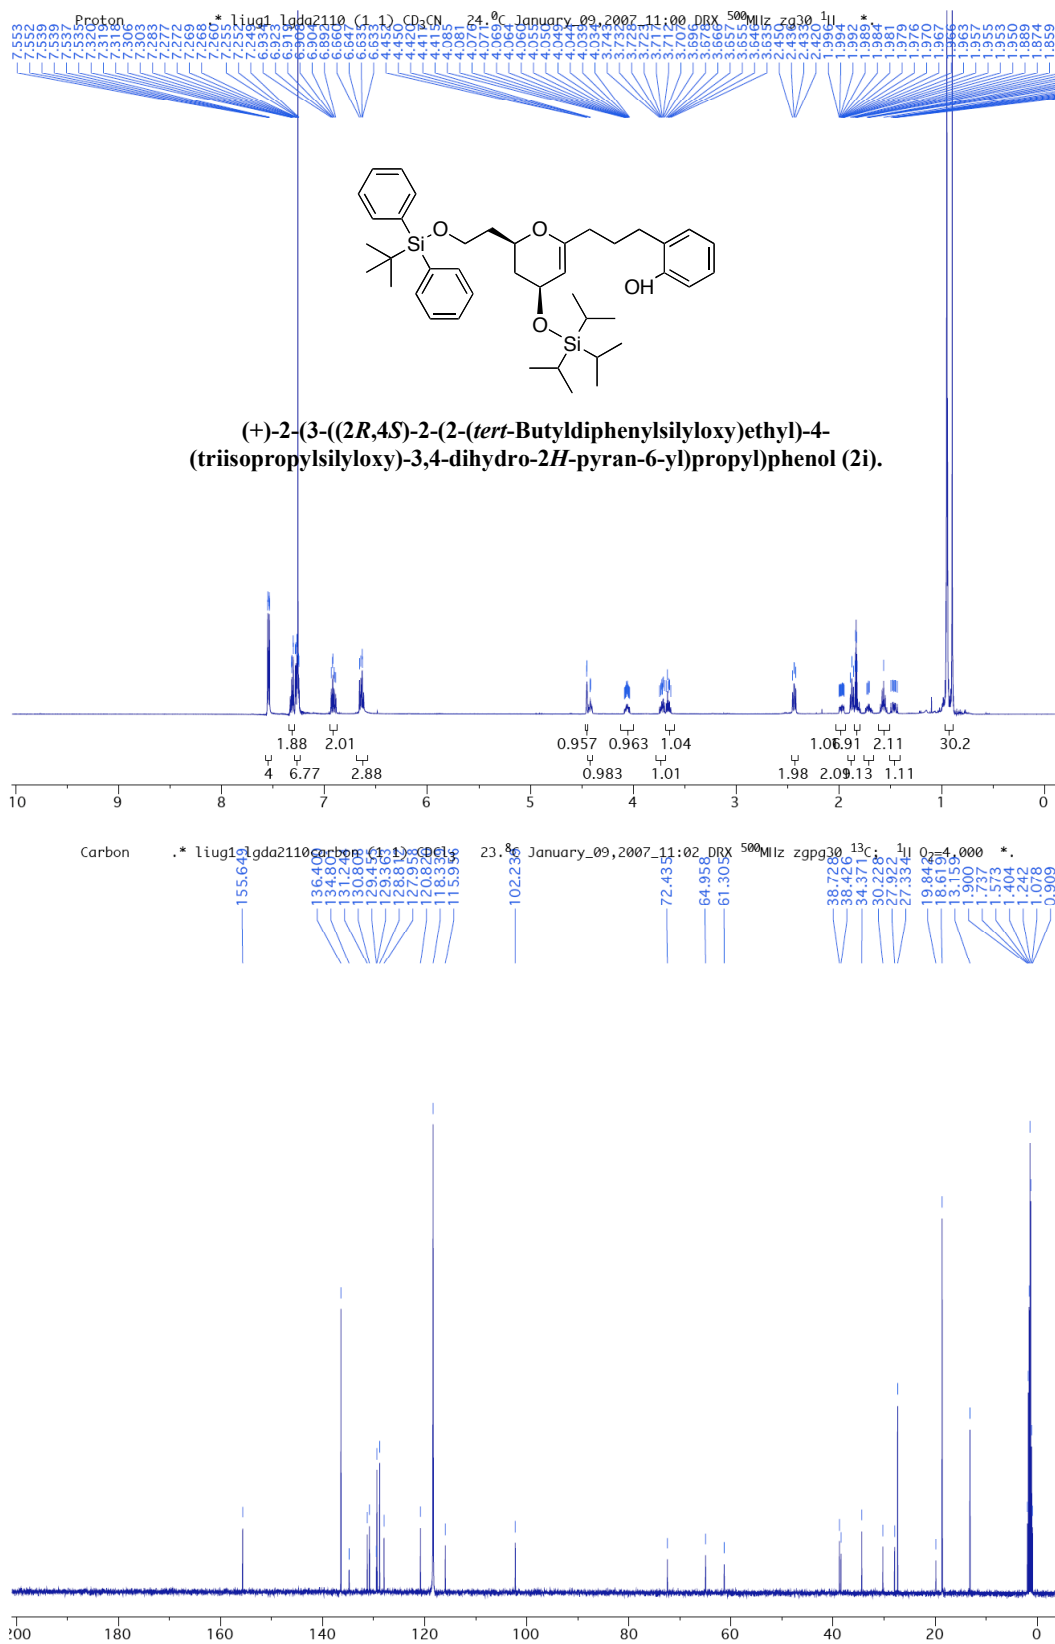

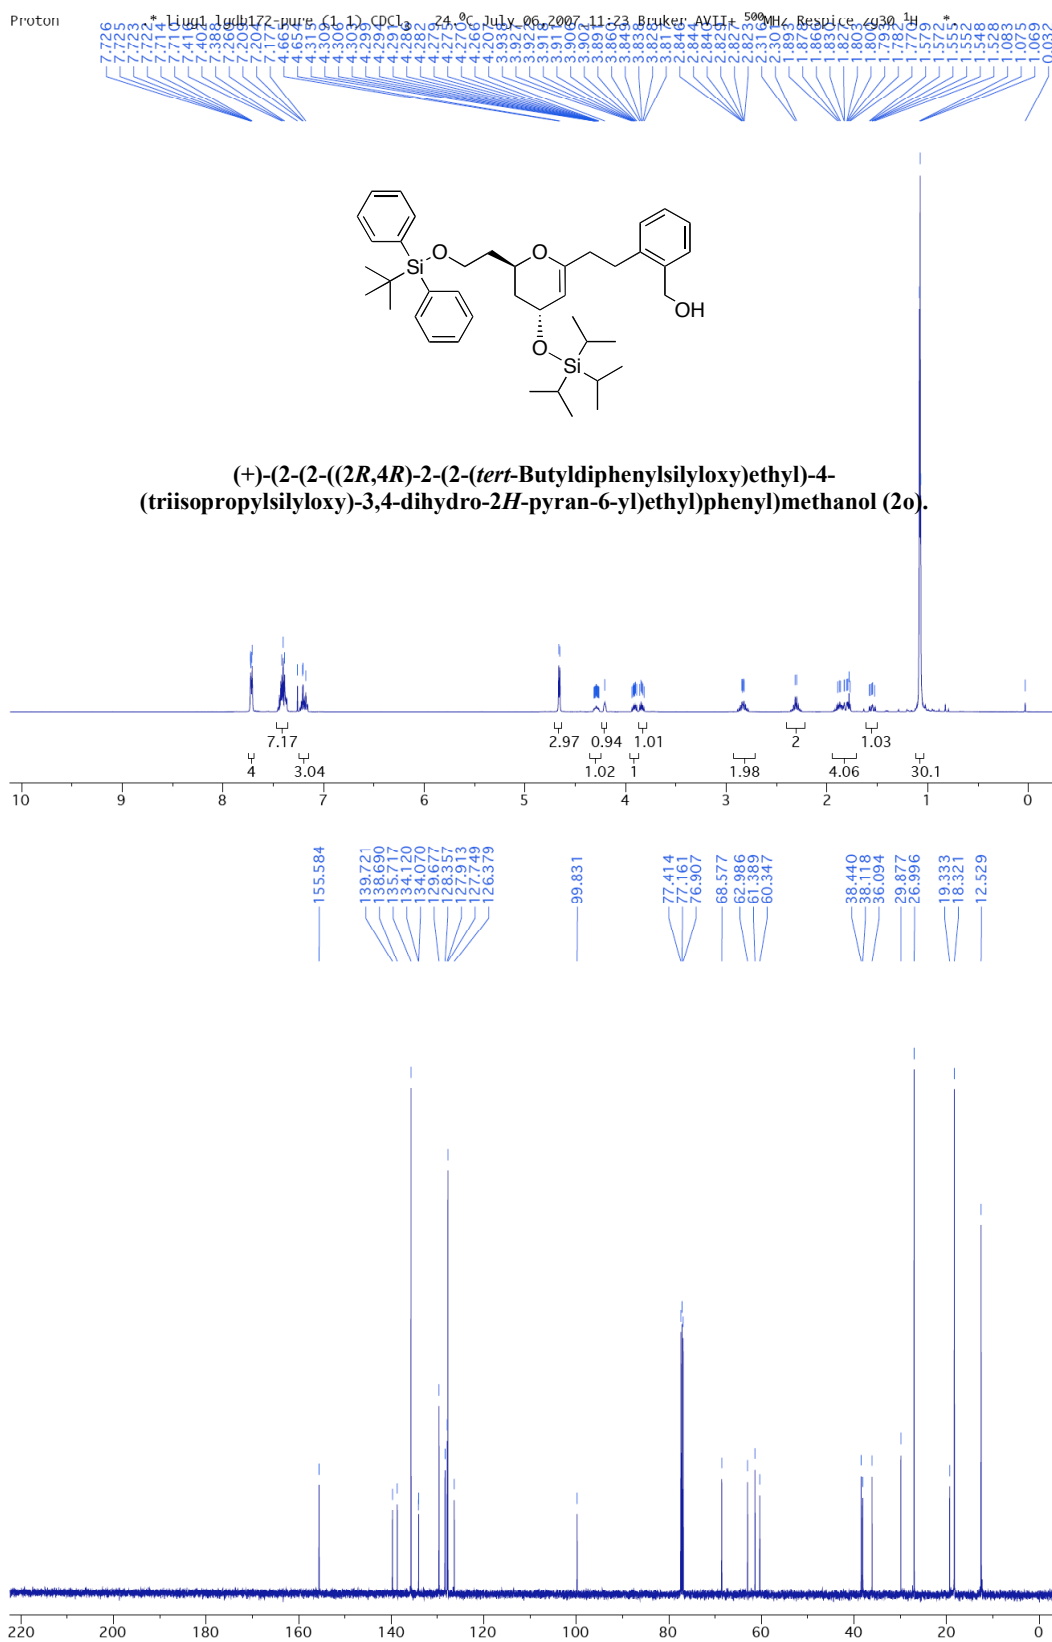

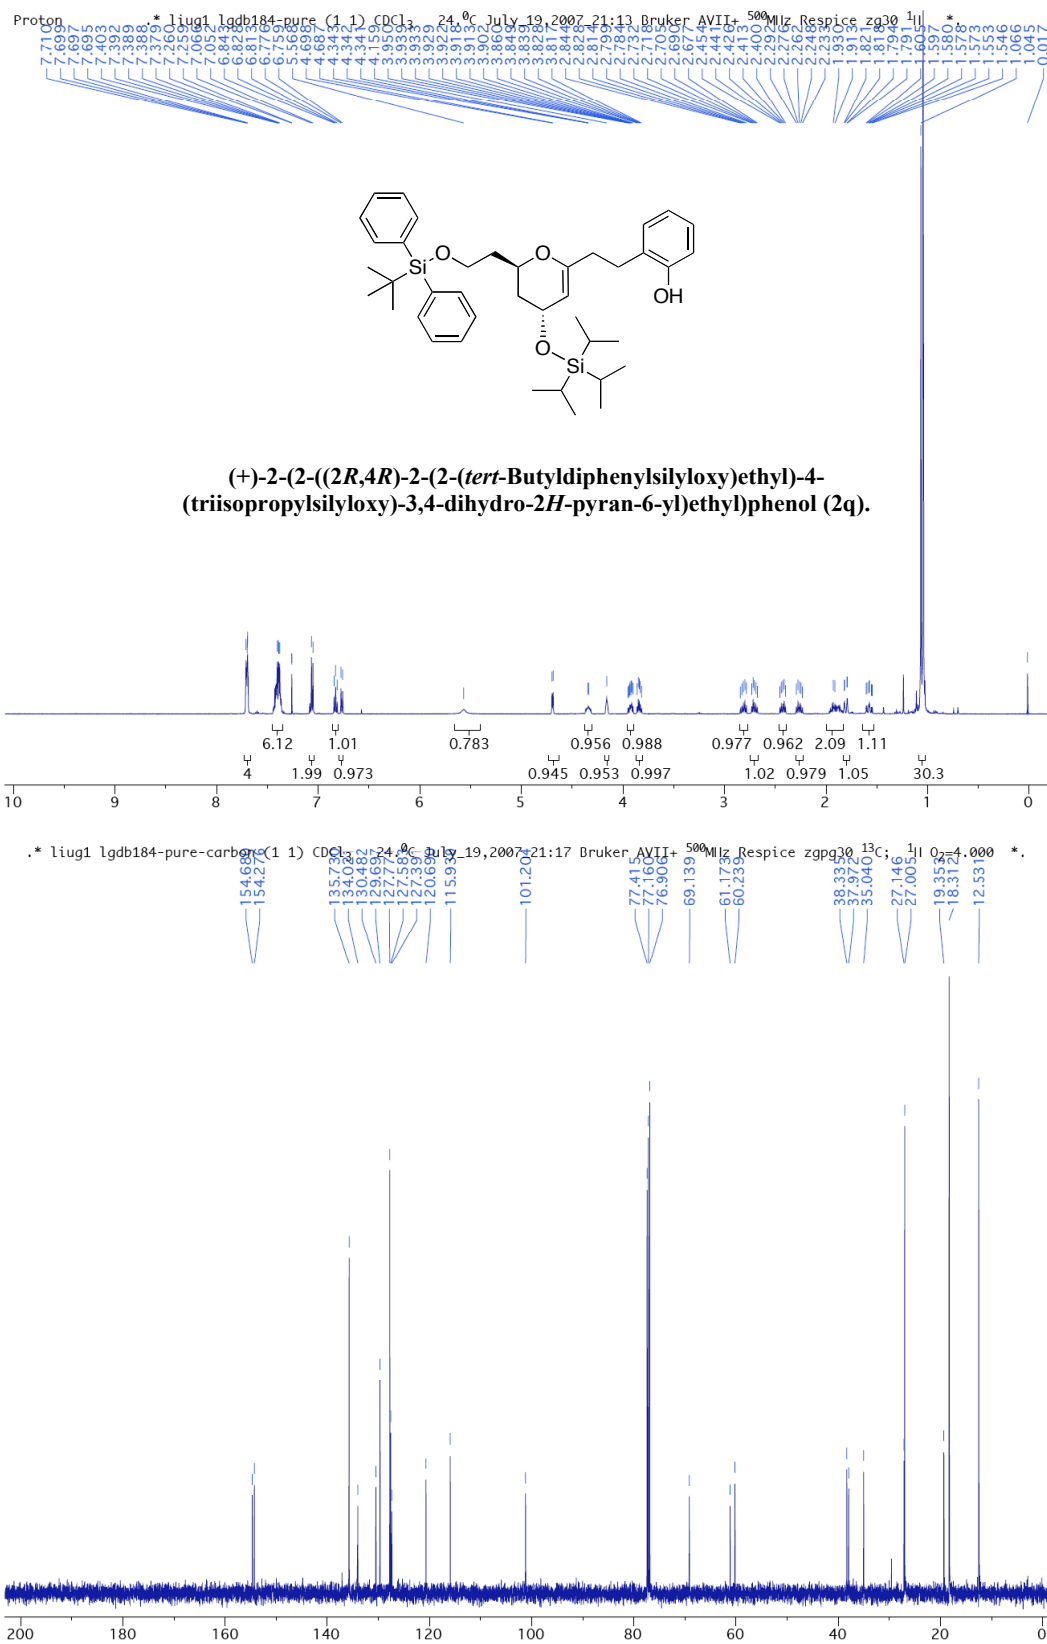

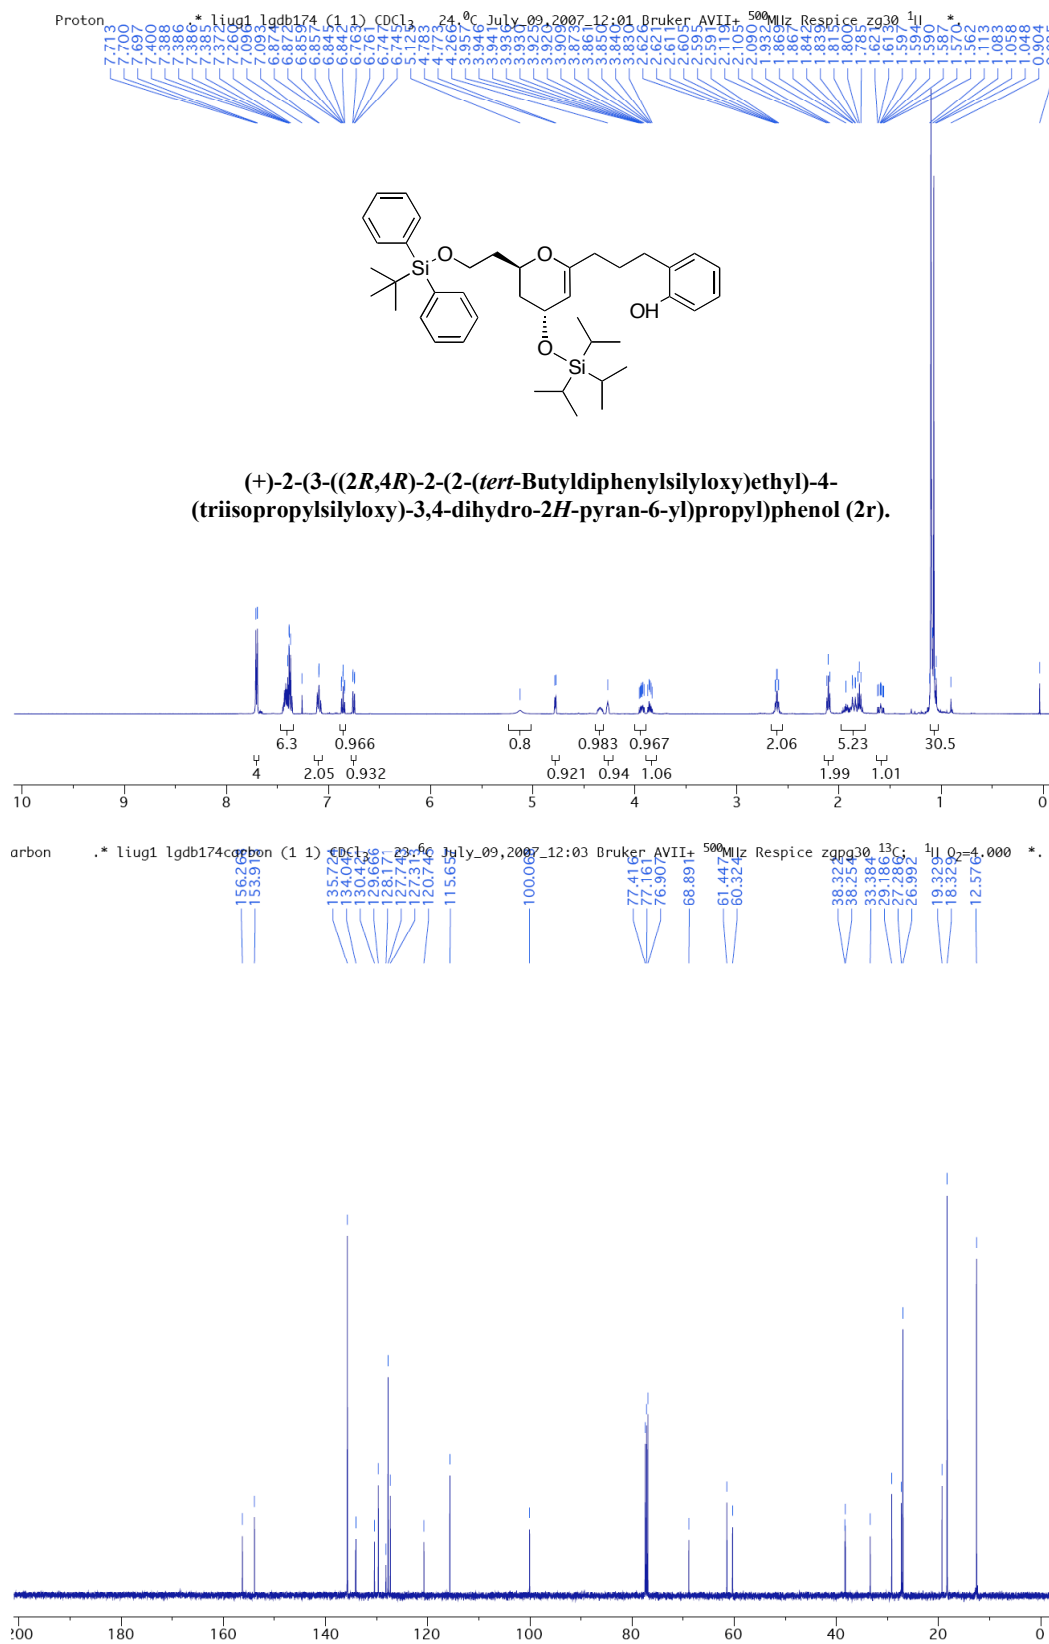

### C. SPIROCYCLIZATION WITH RETENTION OF CONFIGURATION (Ti[OI-Pr]<sub>4</sub>) (4a-r)

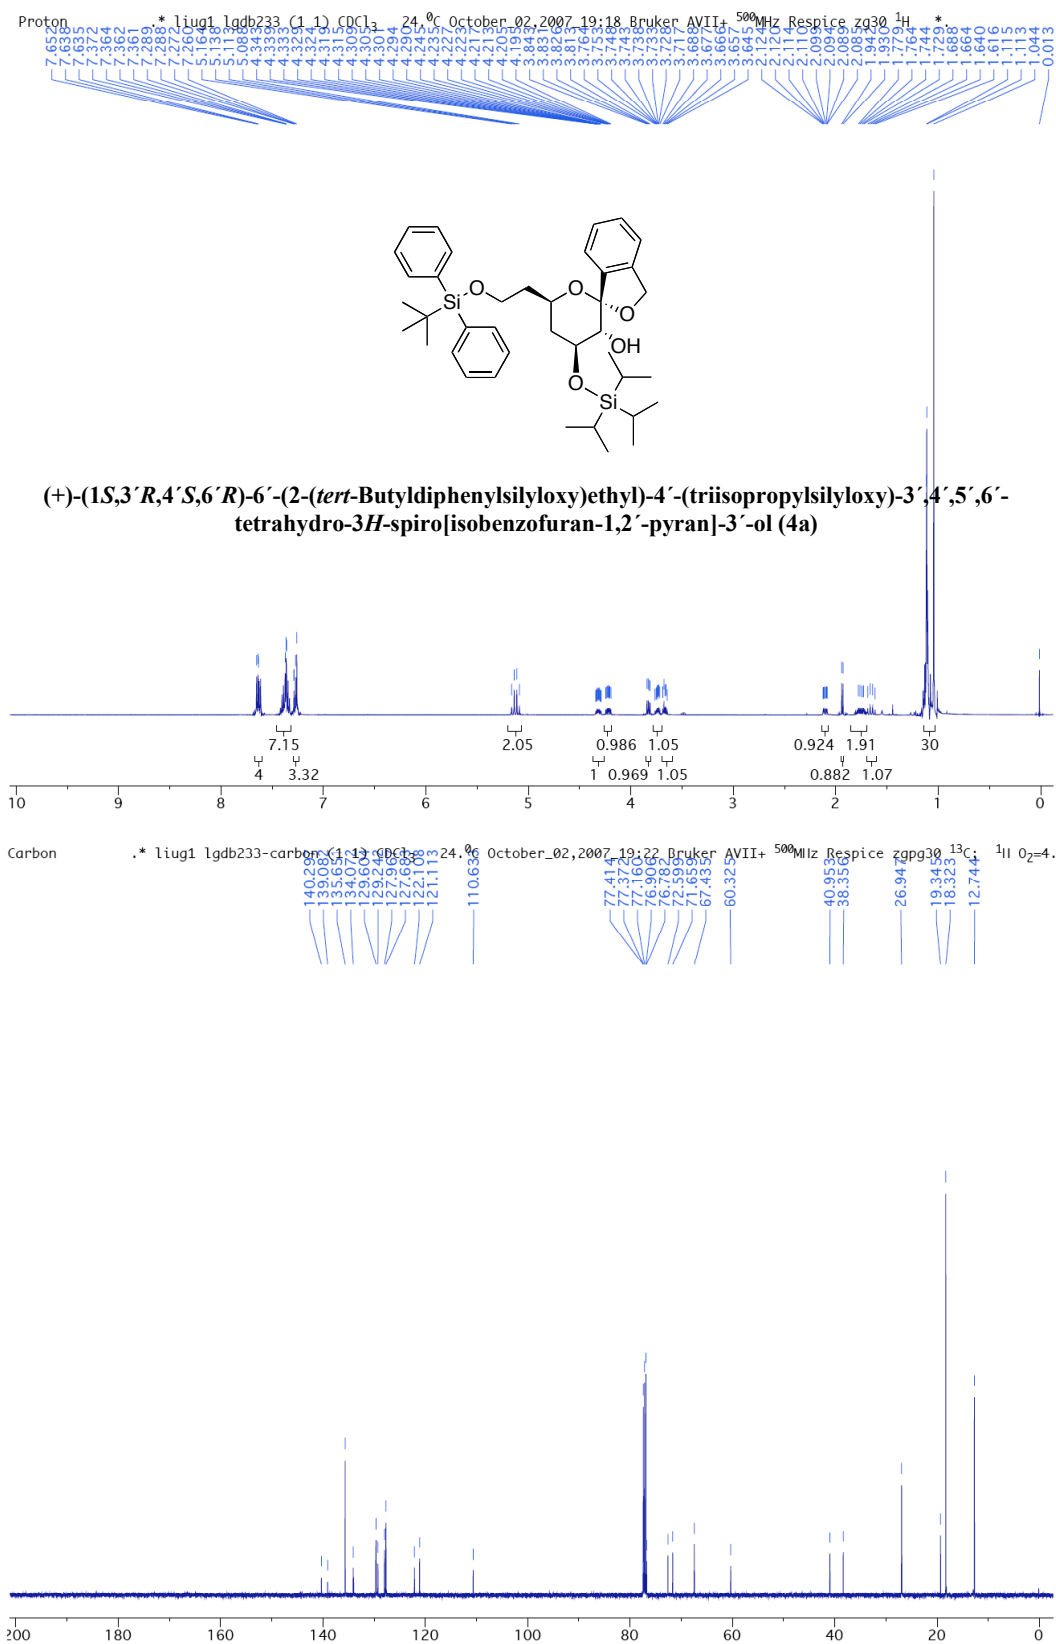

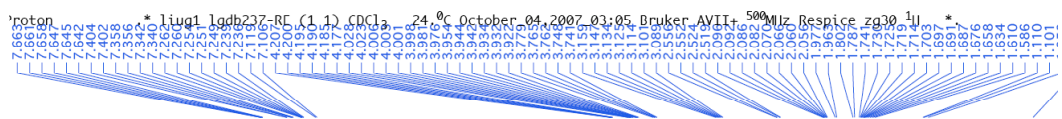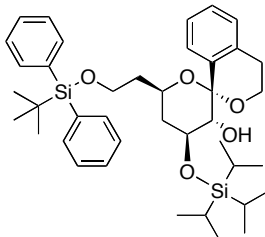

**(+)-(1*S*,3'*R*,4'*S*,6'*R*)-6'-(2-(*tert*-Butyldiphenylsilyloxy)ethyl)-4'-(triisopropylsilyloxy)-3',4',5',6'-tetrahydrospiro[isochroman-1,2'-pyran]-3'-ol (4b)**

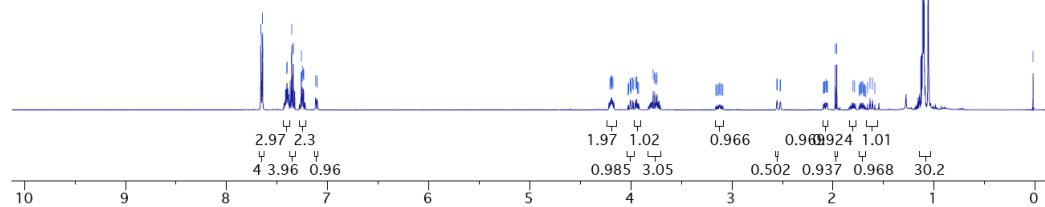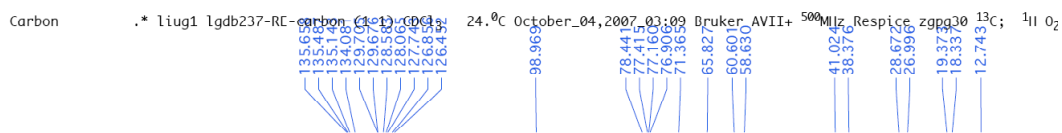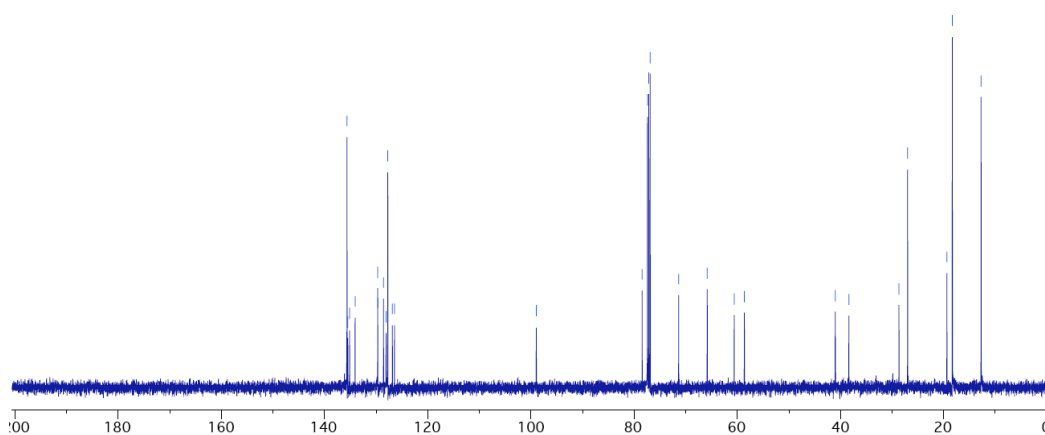

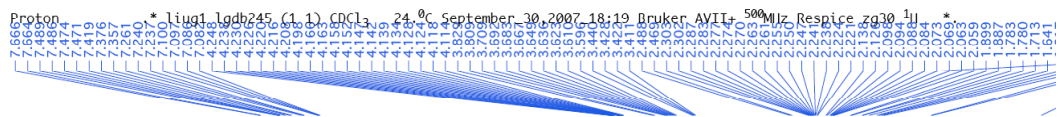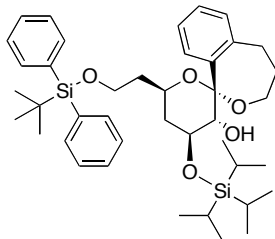

**(+)-(1*S*,3'*R*,4'*S*,6'*R*)-6'-(2-(*tert*-Butyldiphenylsilyloxy)ethyl)-4'-(triisopropylsilyloxy)-3',4,4',5,5',6'-hexahydro-3*H*-spiro[benzo[*c*]oxepine-1,2'-pyran]-3'-ol (4c)**

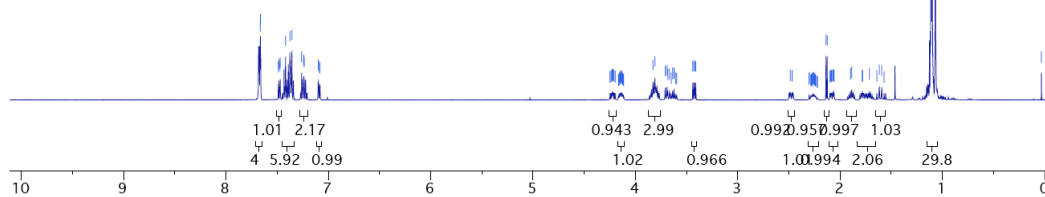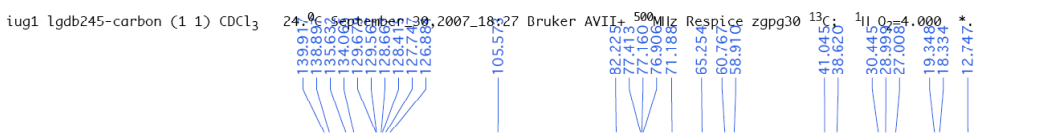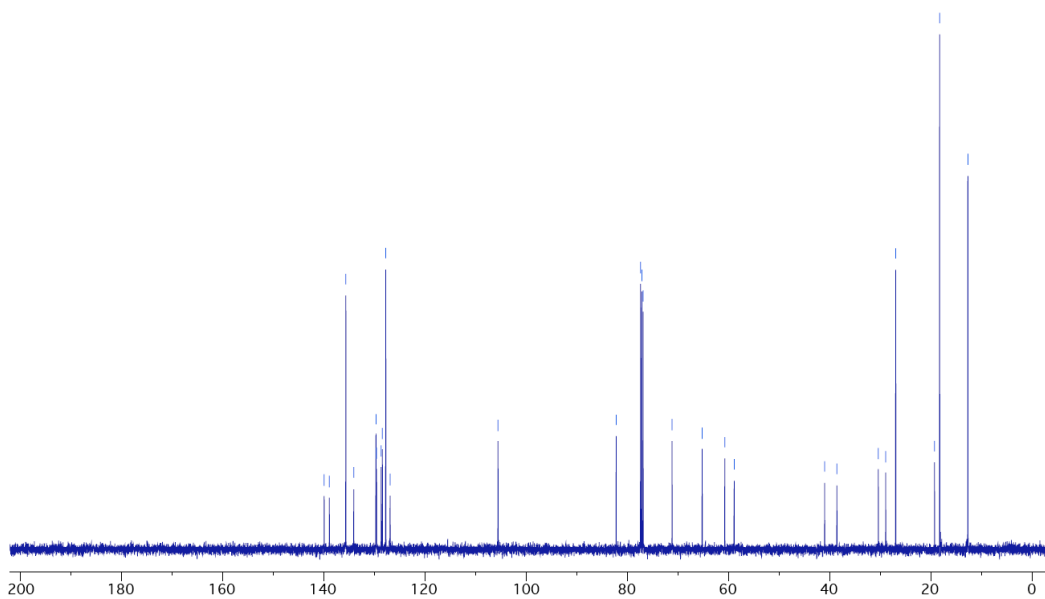



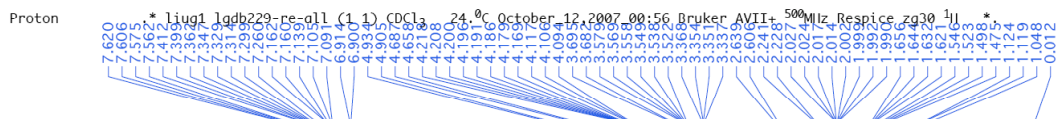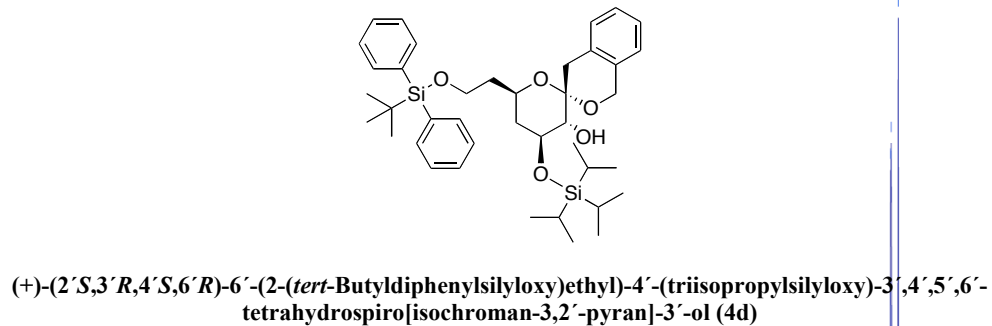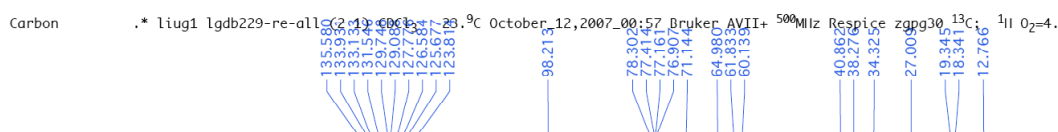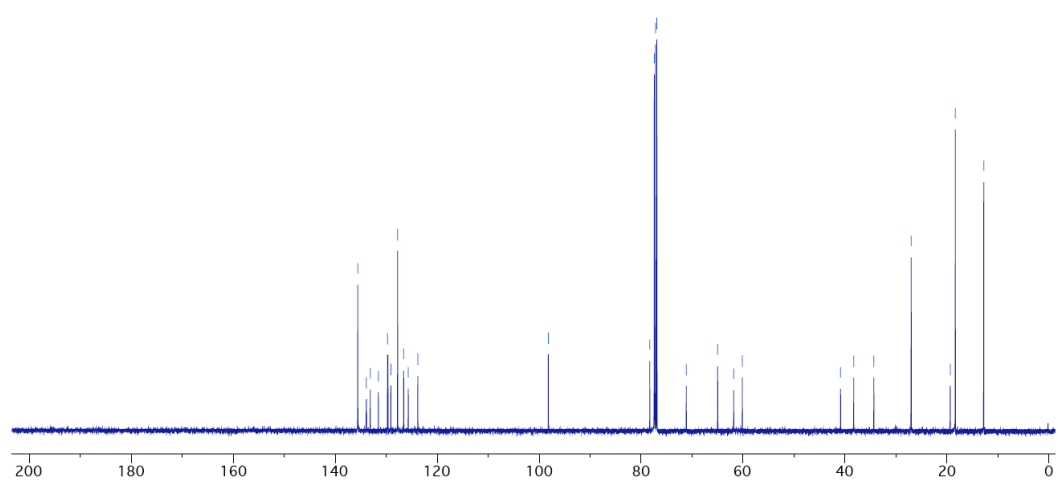



6,7 retention aryl fused spiroketal from precursor A235.\* wurstj JMW\_A236\_RF (1 1) CDCl<sub>3</sub>, 24.0°C August\_24,2007 16:51 Bruker AVII-

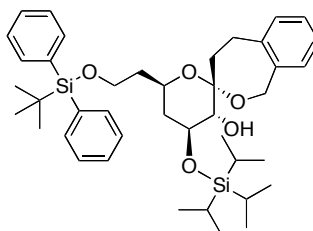

(+)-(2'*S*,3'*R*,4'*S*,6'*R*)-6'-(2-(*tert*-Butyldiphenylsilyloxy)ethyl)-4'-(triisopropylsilyloxy)-3',4,4',5,5',6'-hexahydro-1*H*-spiro[benzo[*c*]oxepine-3,2'-pyran]-3'-ol (4f)

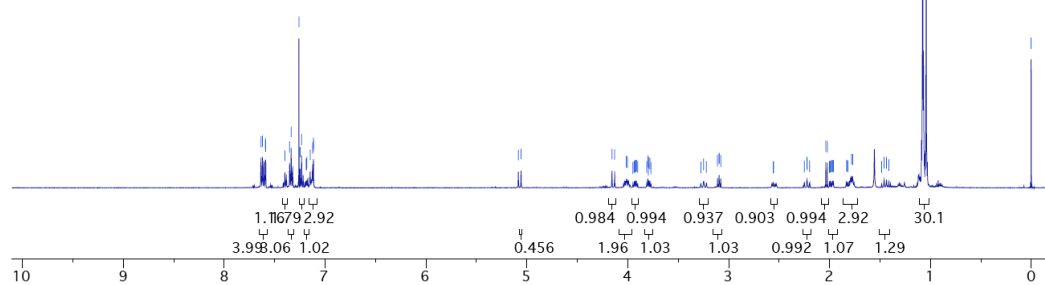

13C NMR spectrum of compound 4f in CDCl<sub>3</sub>. The x-axis ranges from 220 to 0 ppm. The spectrum shows a large peak at 101.06 ppm (CDCl<sub>3</sub>) and several other peaks in the aliphatic and aromatic regions.

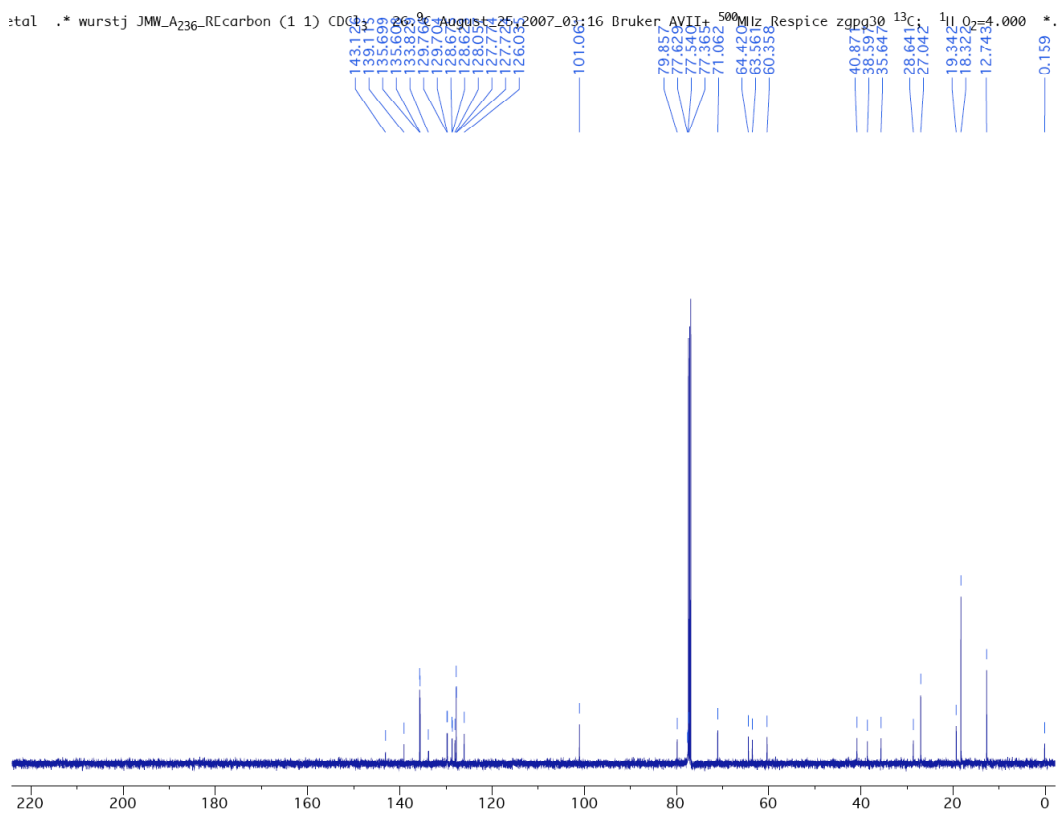

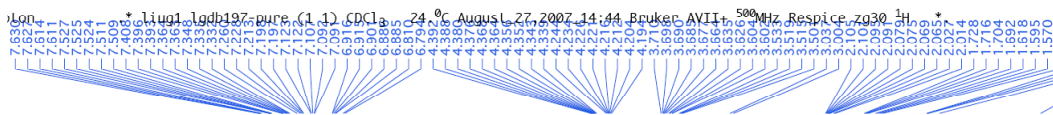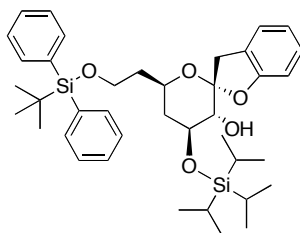

**(+)-(2*R*,3'*R*,4'*S*,6'*R*)-6'-(2-(*tert*-Butyldiphenylsilyloxy)ethyl)-4'-(triisopropylsilyloxy)-3',4',5',6'-tetrahydro-3*H*-spiro[benzofuran-2,2'-pyran]-3'-ol (4g)**

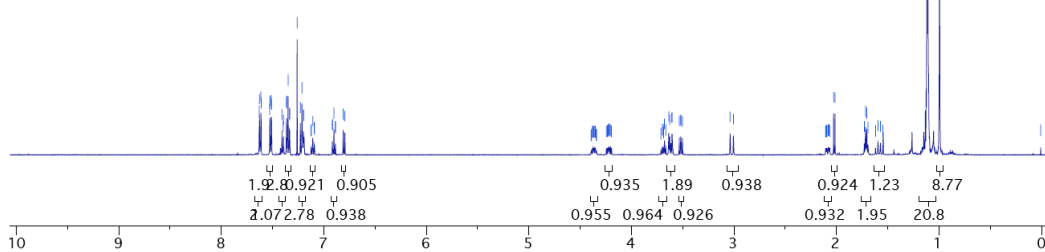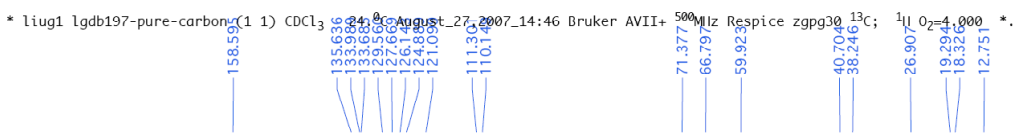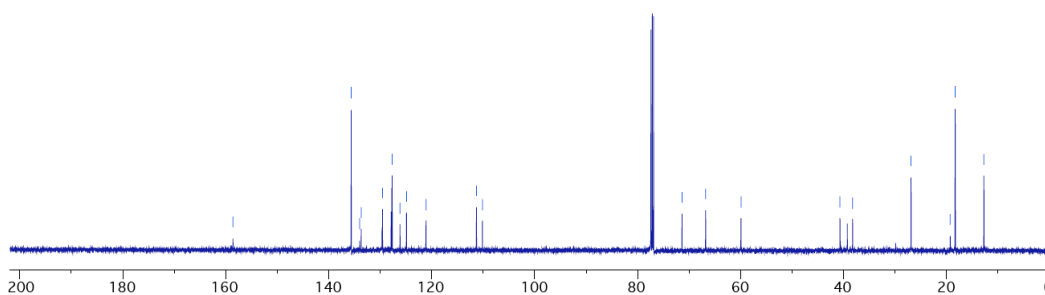

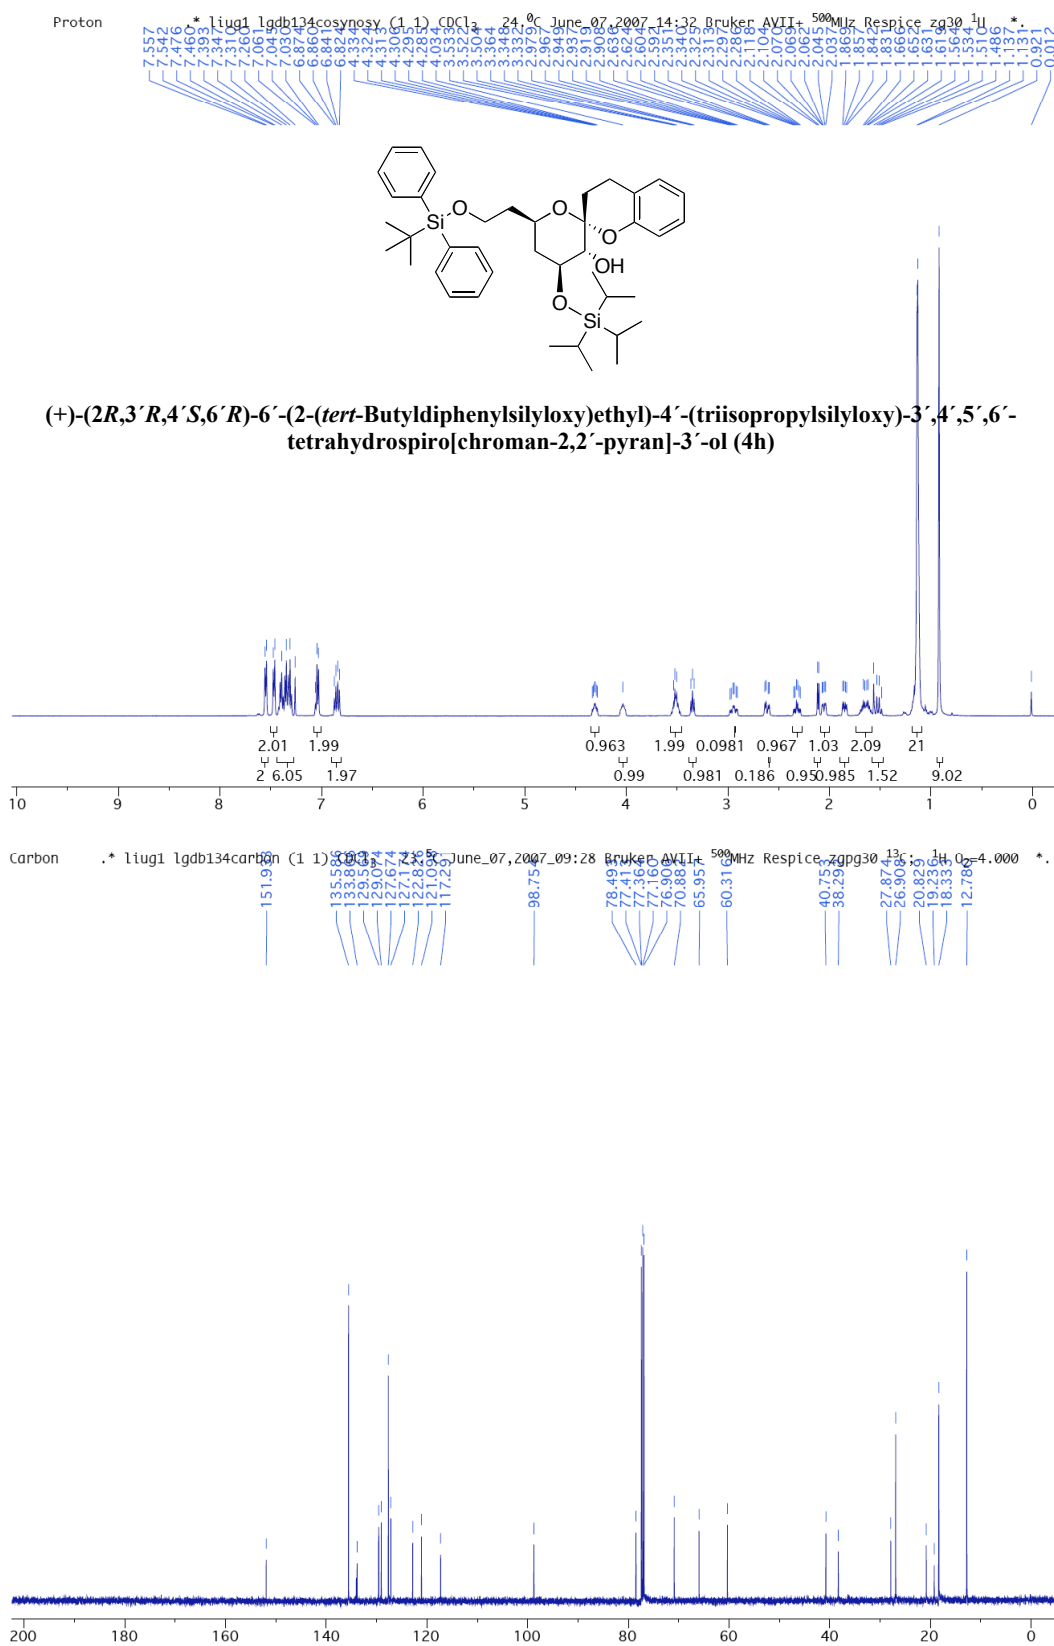

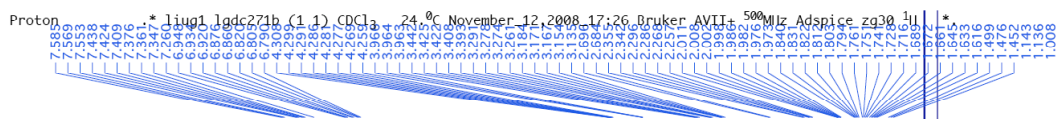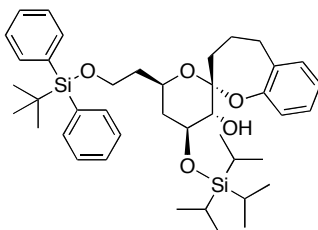

**(+)-(2*R*,3'*R*,4'*S*,6'*R*)-6'-(2-(*tert*-Butyldiphenylsilyloxy)ethyl)-4'-(triisopropylsilyloxy)-3',4,4',5,5',6'-hexahydro-3*H*-spiro[benzo[*b*]oxepine-2,2'-pyran]-3'-ol (4i)**

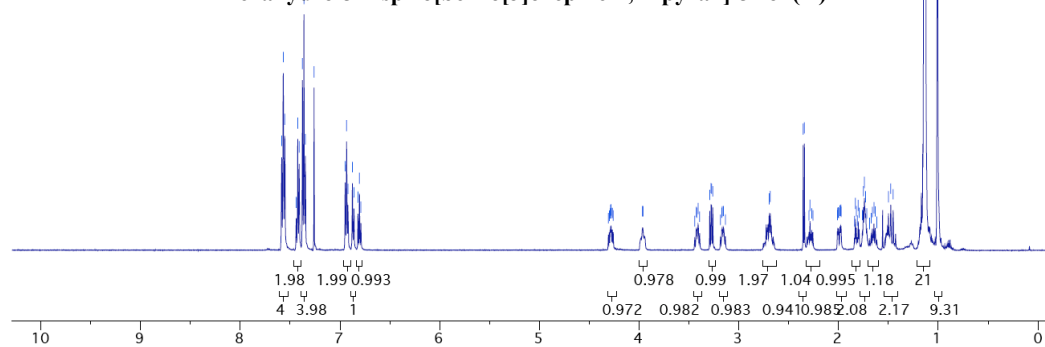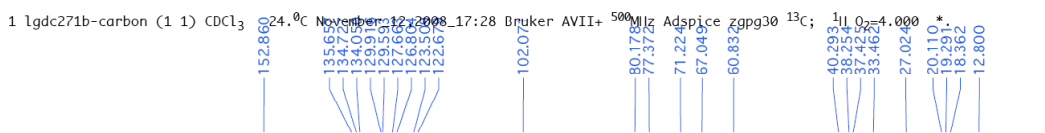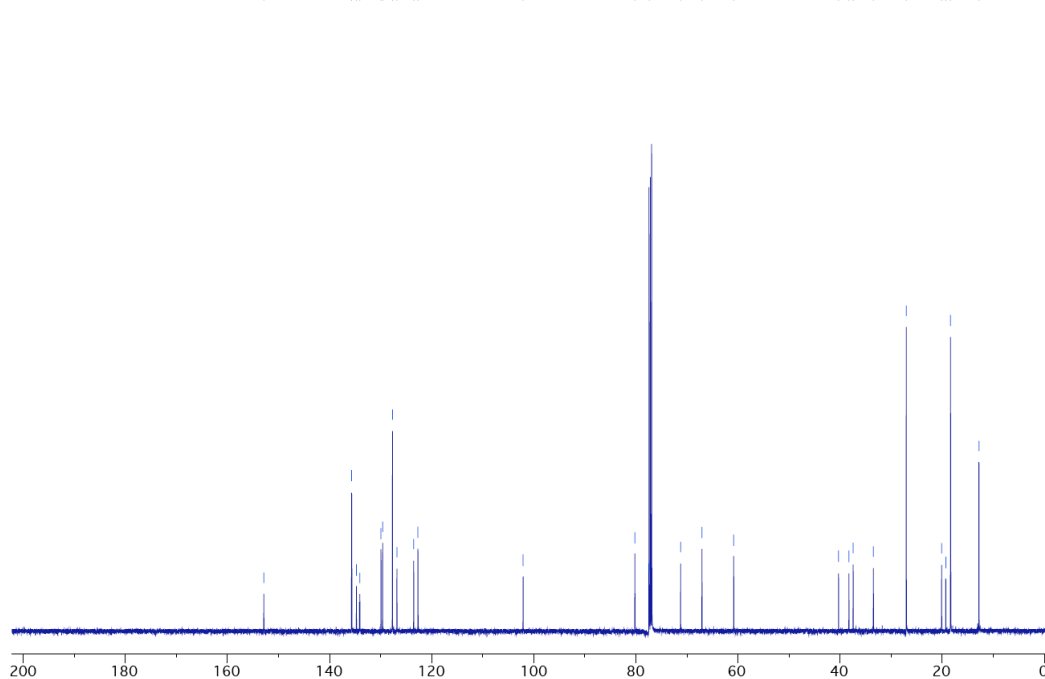

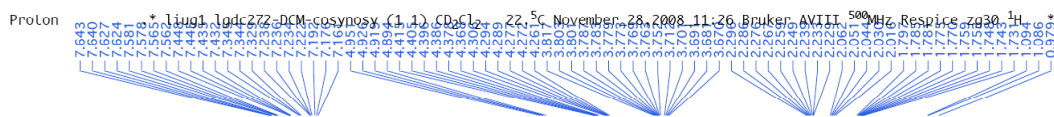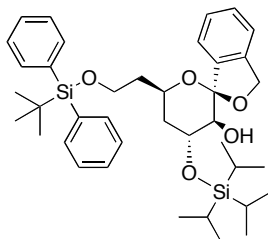

**(+)-(1*R*,3'*S*,4'*R*,6'*R*)-6'-(2-(*tert*-Butyldiphenylsilyloxy)ethyl)-4'-(triisopropylsilyloxy)-3',4',5',6'-tetrahydro-3*H*-spiro[isobenzofuran-1,2'-pyran]-3'-ol (4j)**

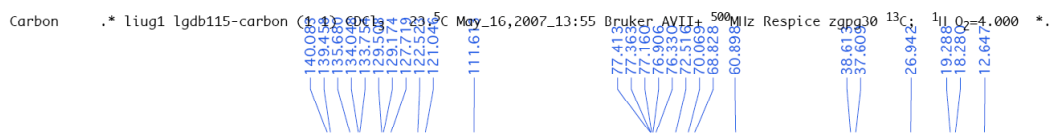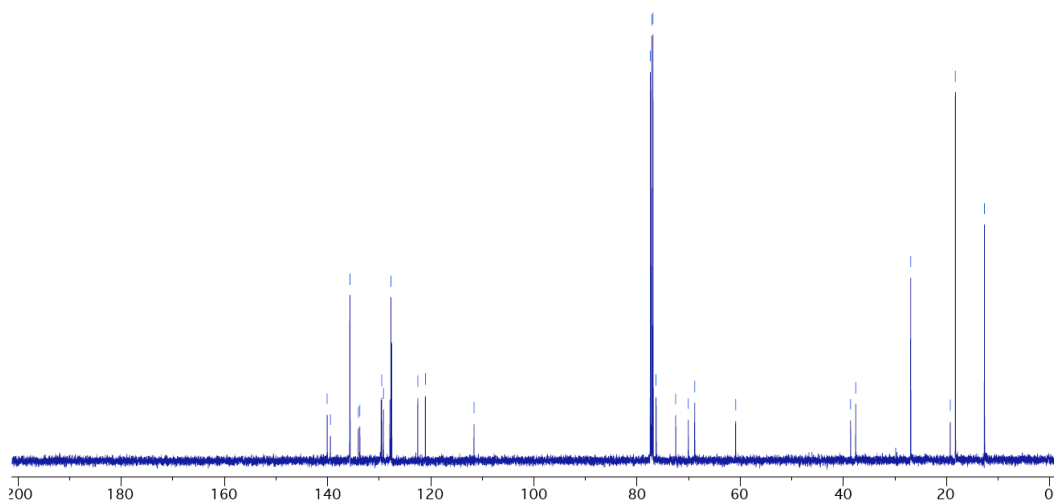





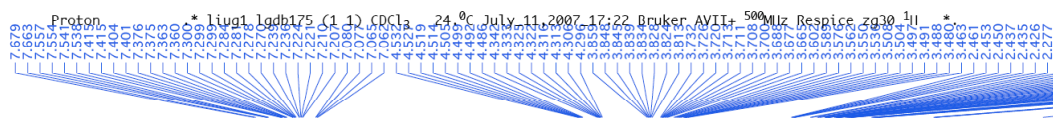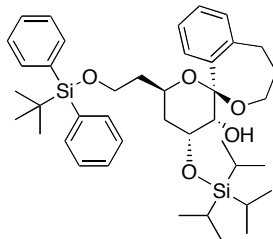

**(+)-(1*R*,3'*S*,4'*R*,6'*R*)-6'-(2-(*tert*-Butyldiphenylsilyloxy)ethyl)-4'-(triisopropylsilyloxy)-3',4,4',5,5',6'-hexahydro-3*H*-spiro[benzo[*c*]oxepine-1,2'-pyran]-3'-ol (4l)**

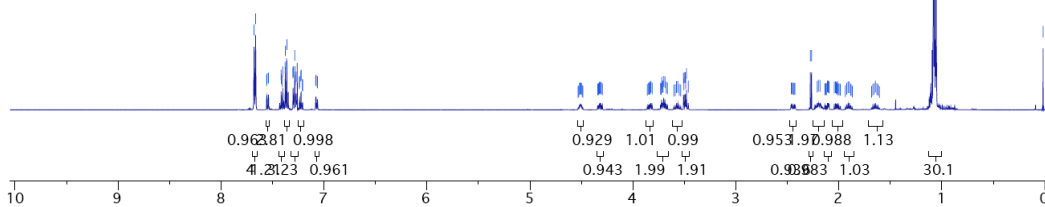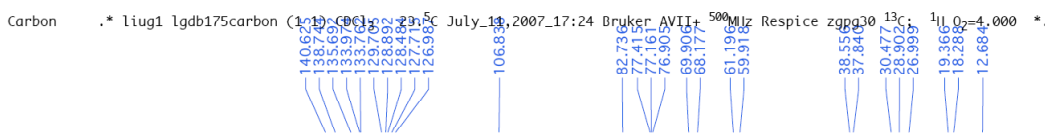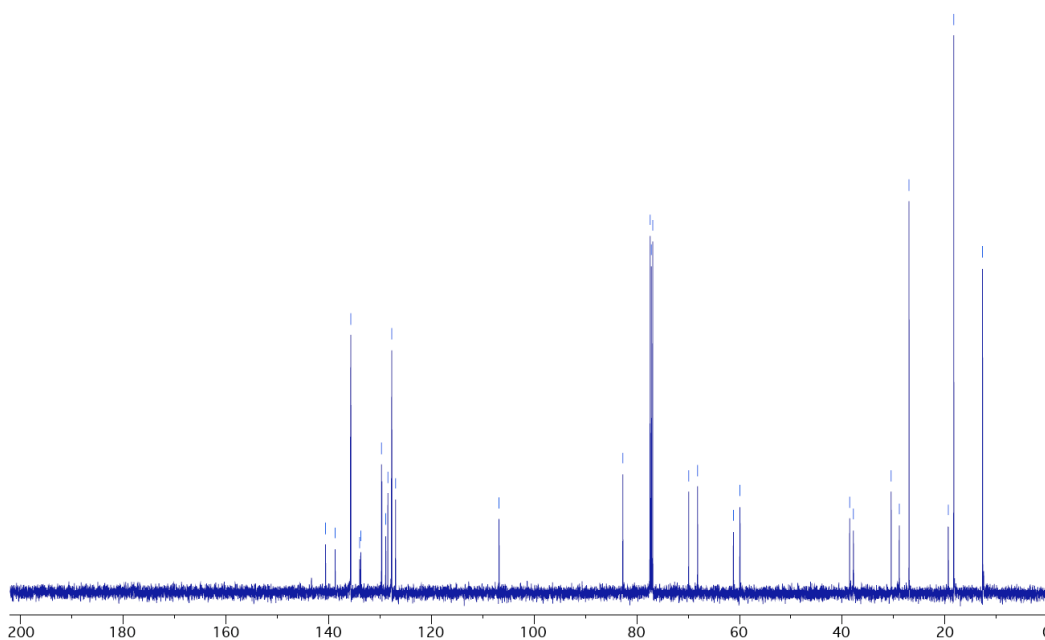



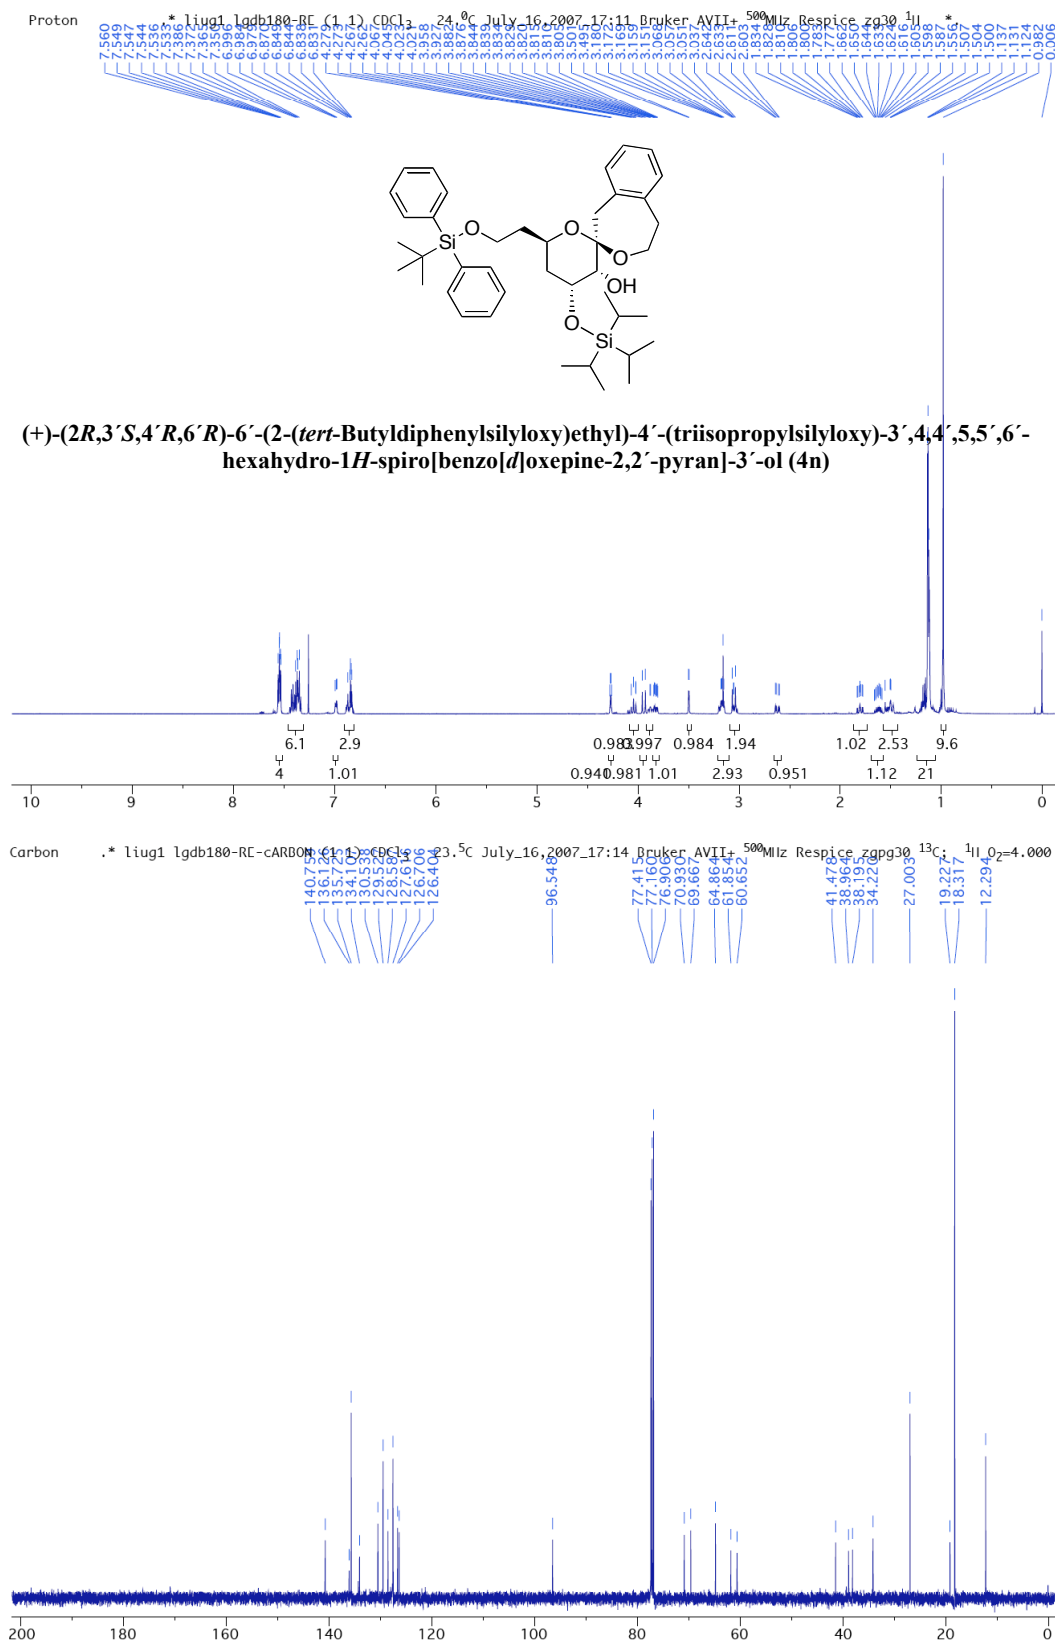

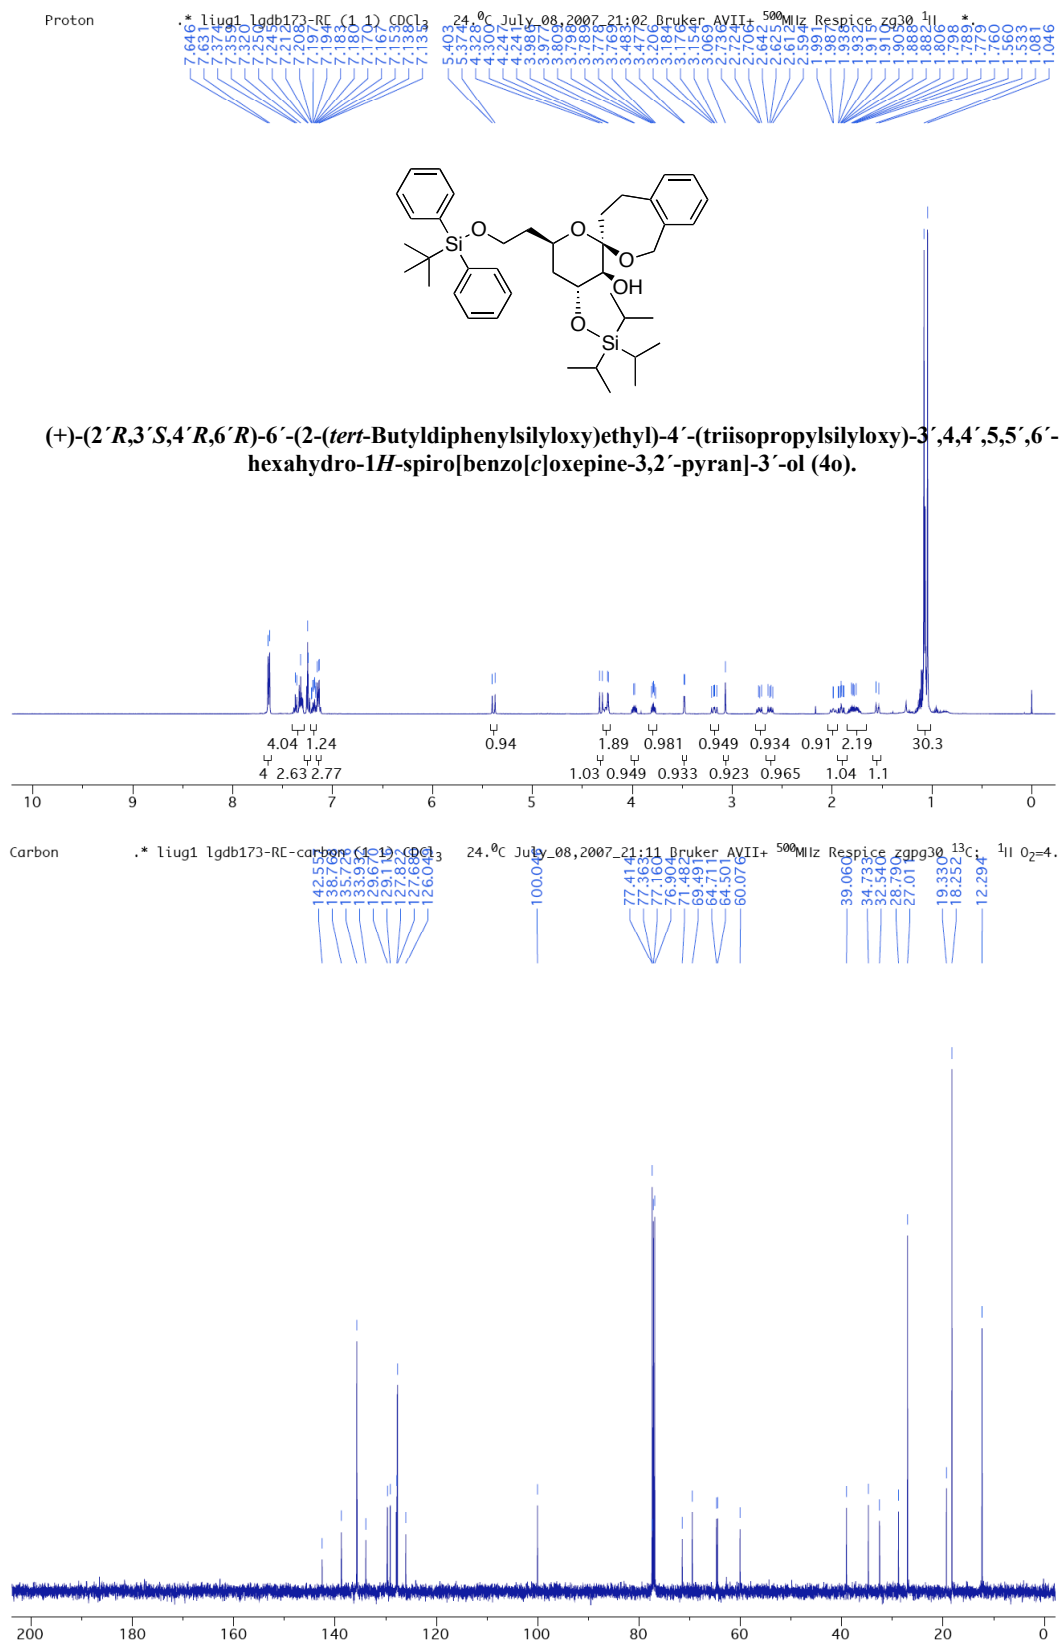

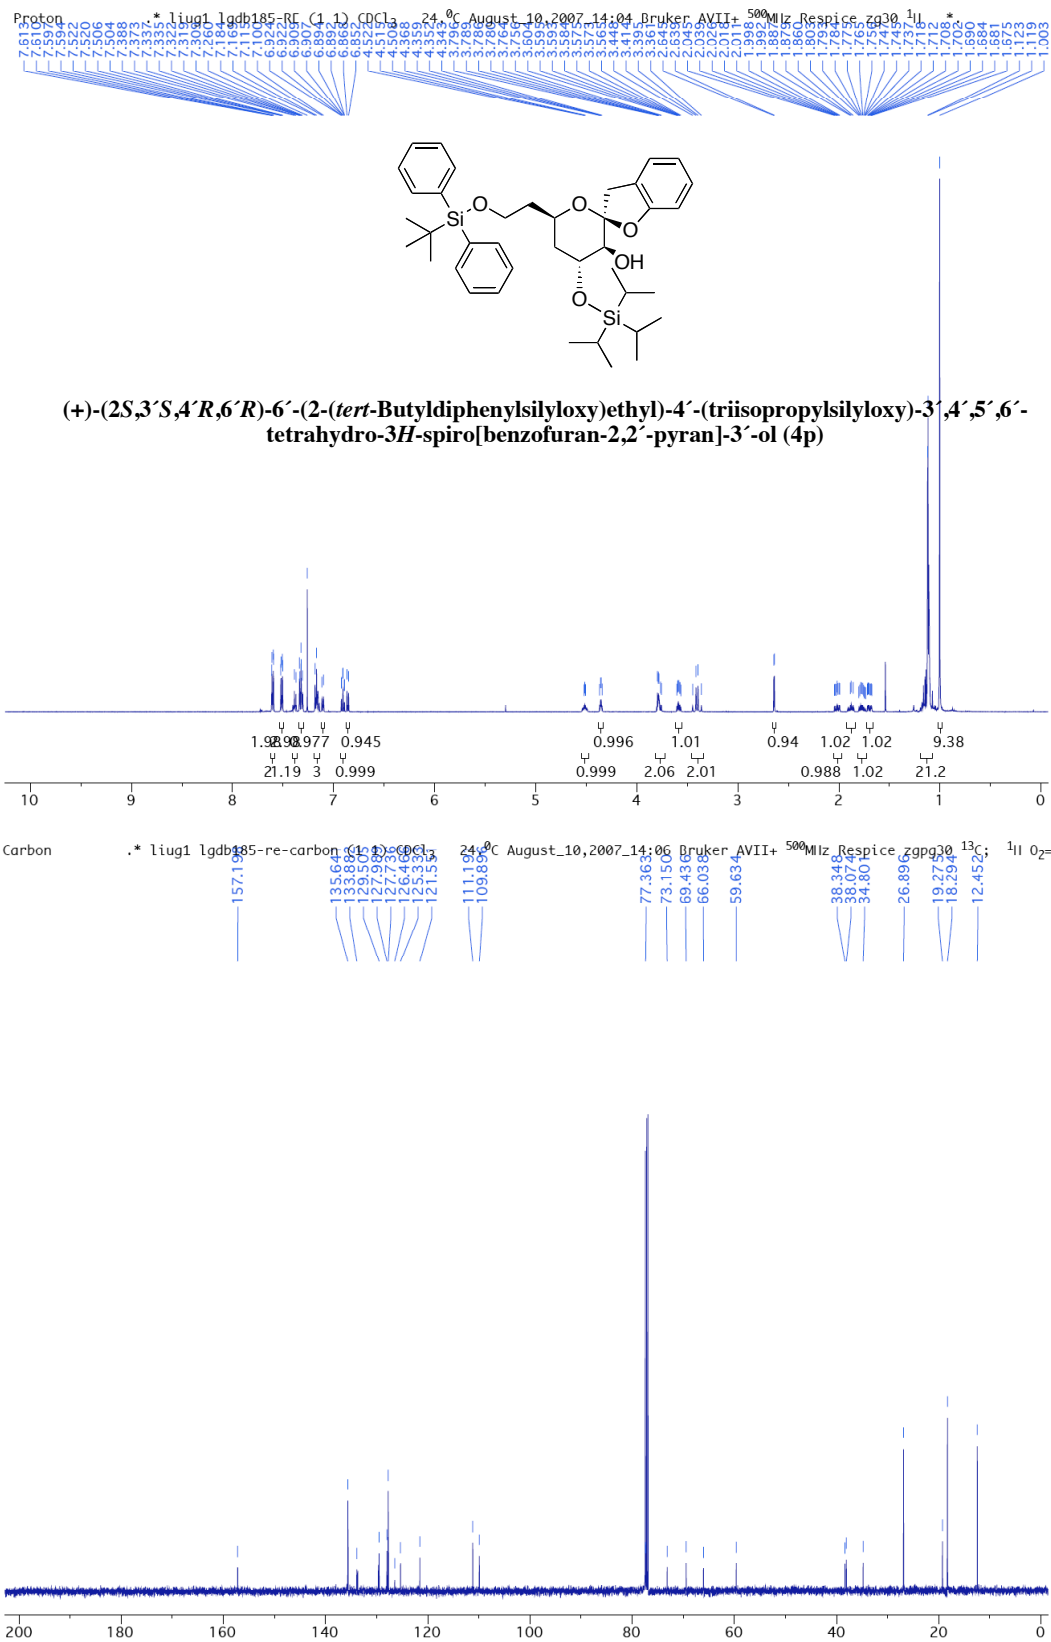



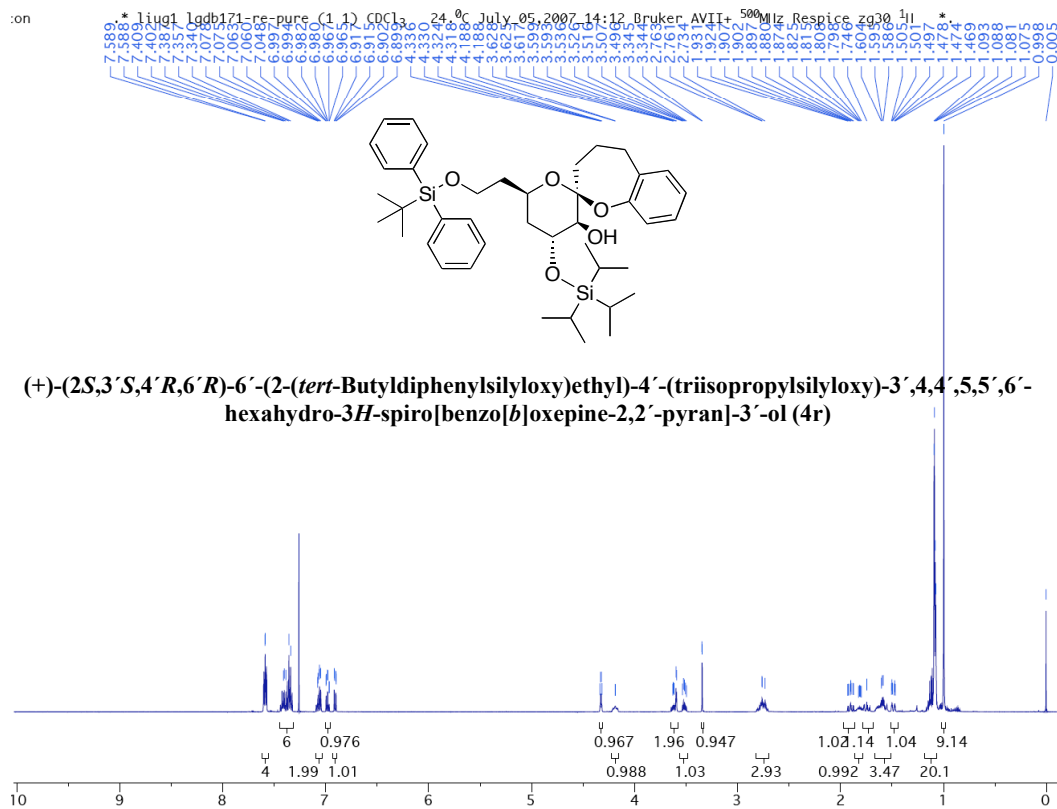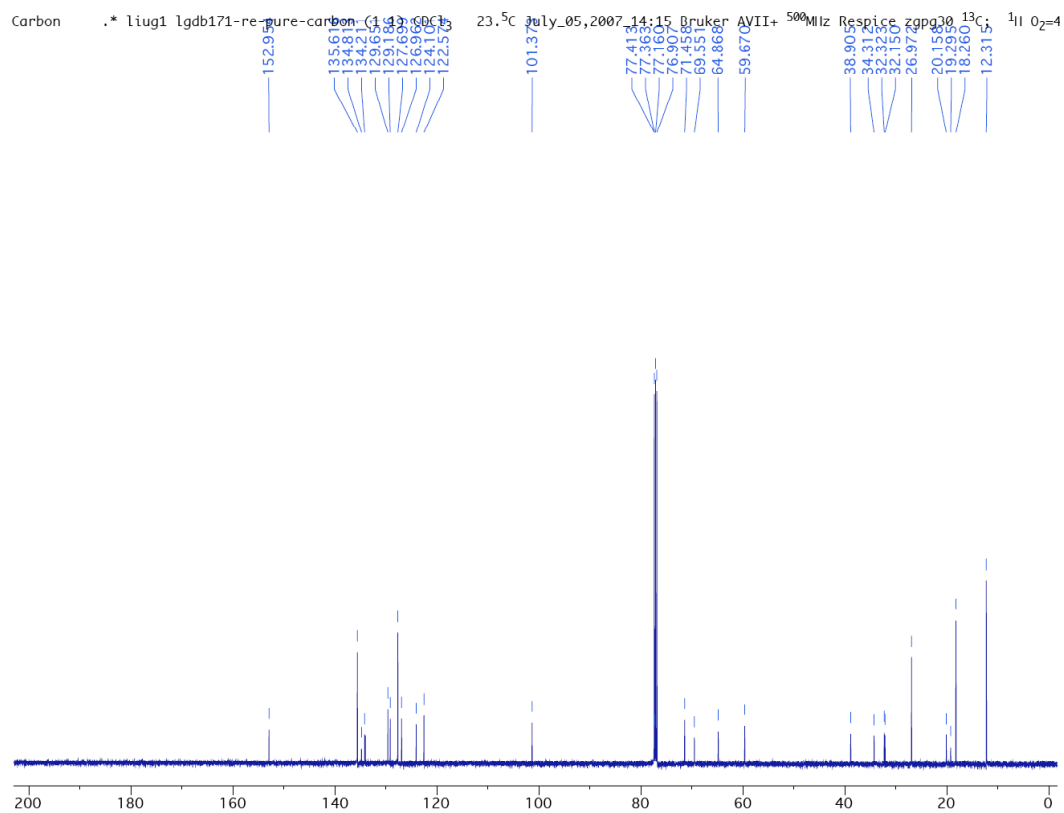

### D. SPIROCYCLIZATION WITH INVERSION OF CONFIGURATION (MEOH OR ACOH) (5a-r)

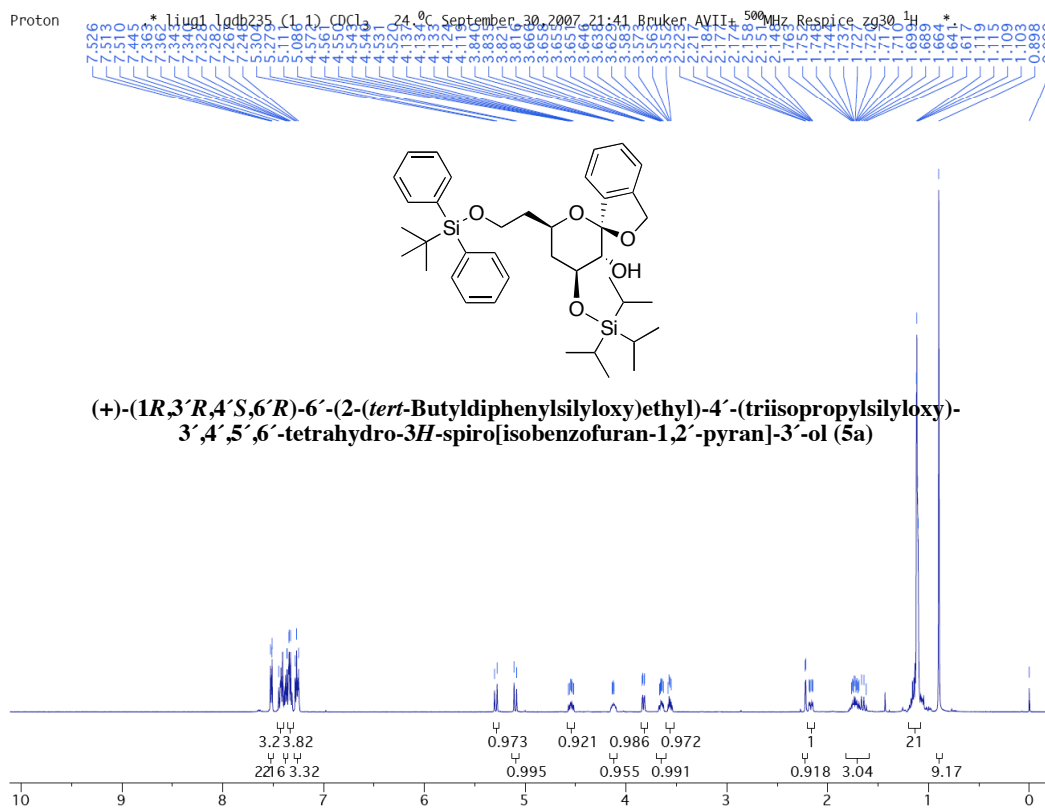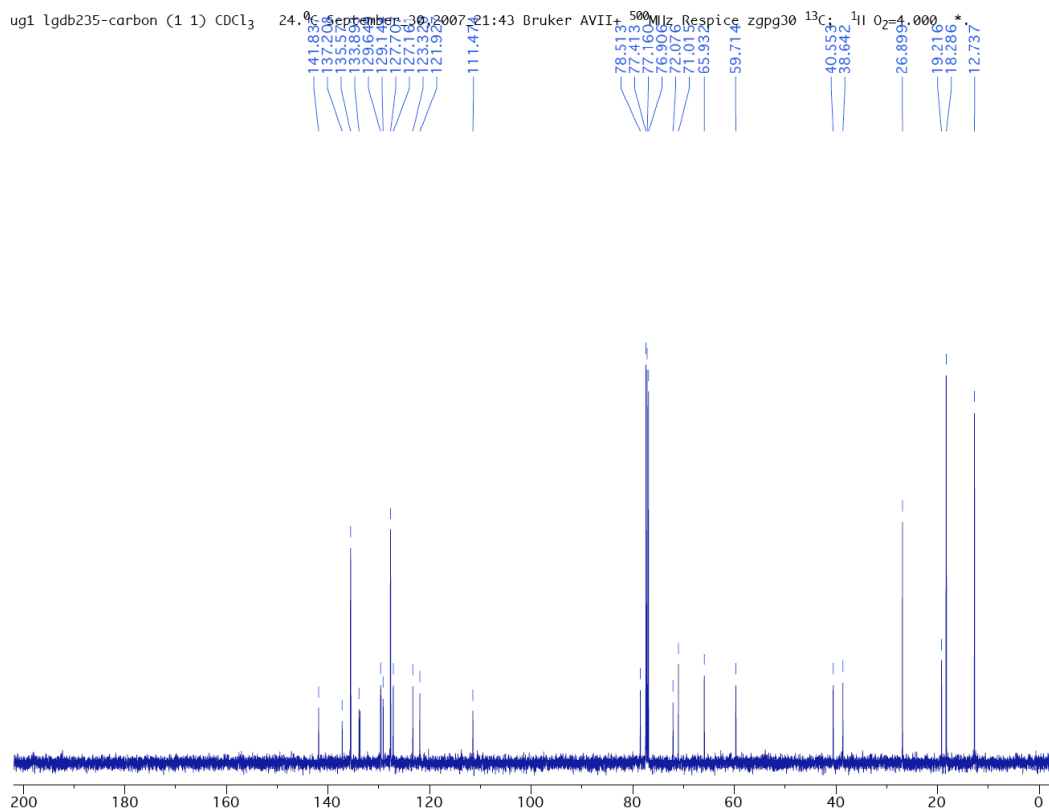



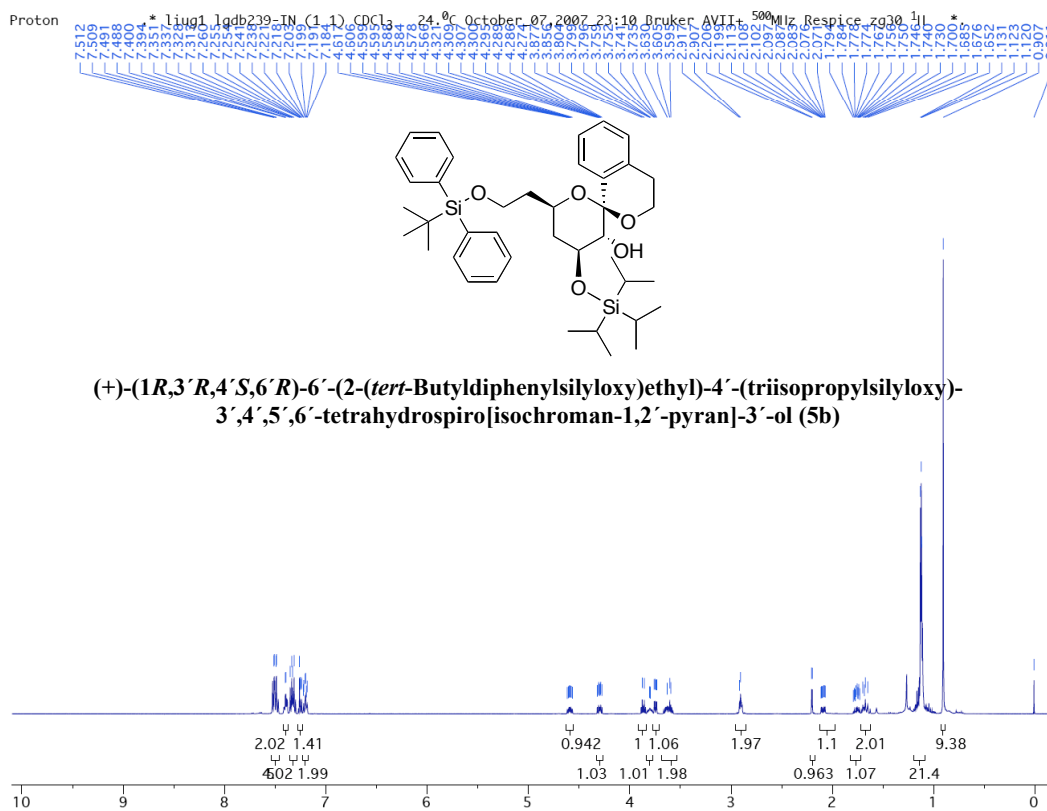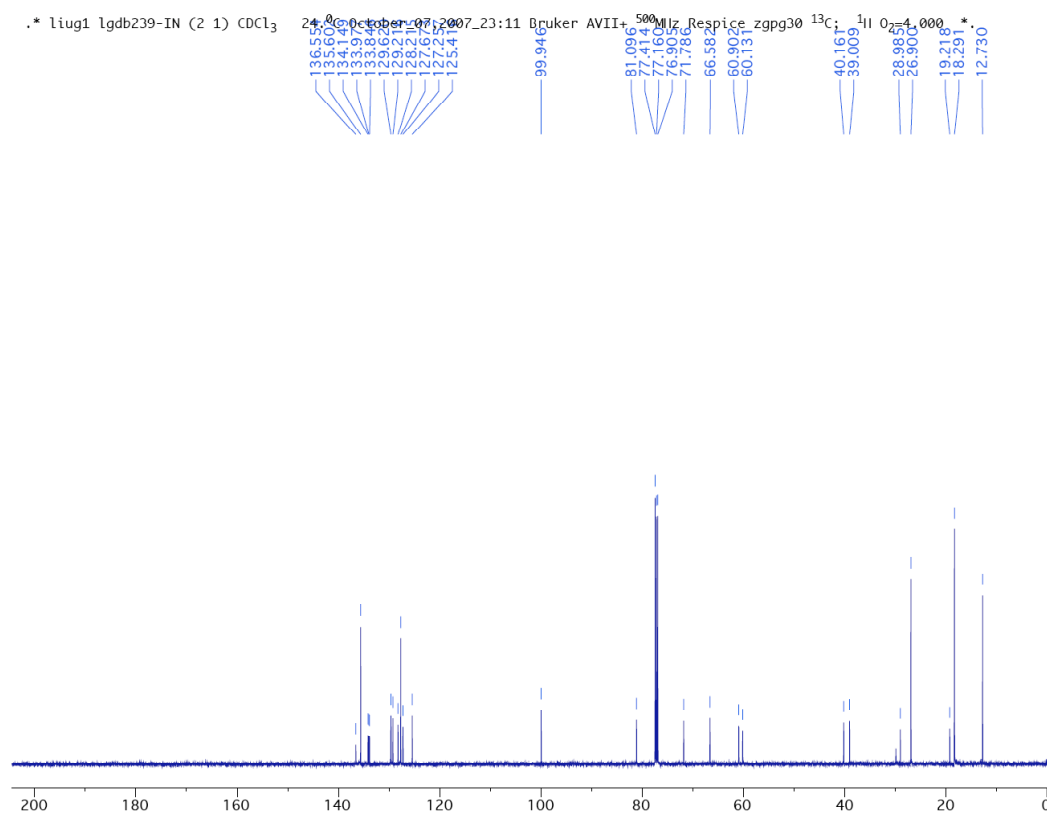

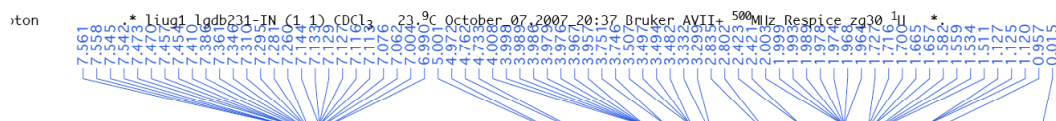



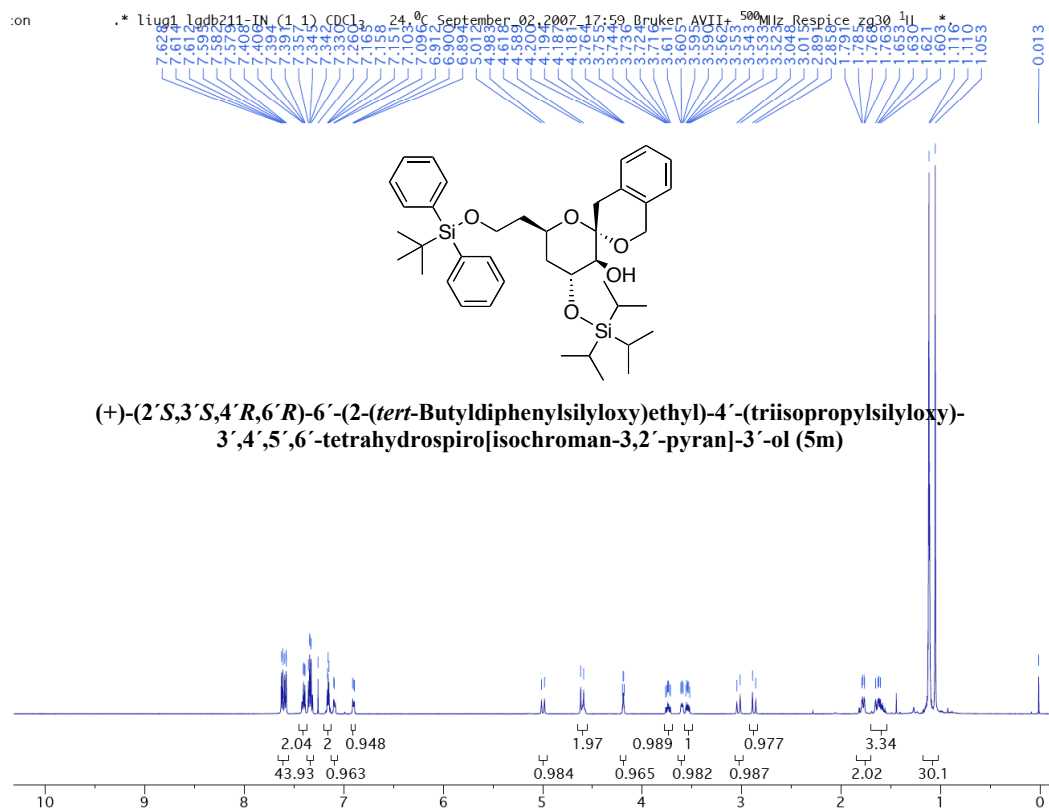

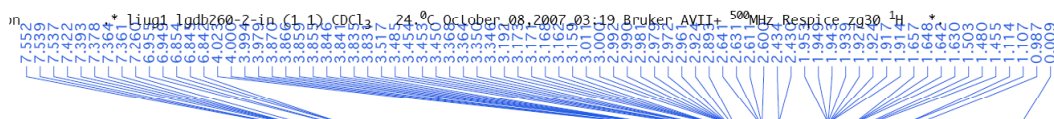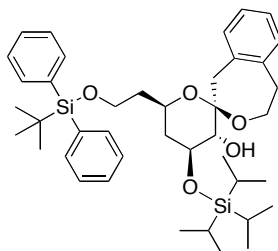

**(+)-(2*R*,3'*R*,4'*S*,6'*R*)-6'-(2-(*tert*-Butyldiphenylsilyloxy)ethyl)-4'-(triisopropylsilyloxy)-3',4,4',5,5',6'-hexahydro-1*H*-spiro[benzo[*d*]oxepine-2,2'-pyran]-3'-ol (5e)**

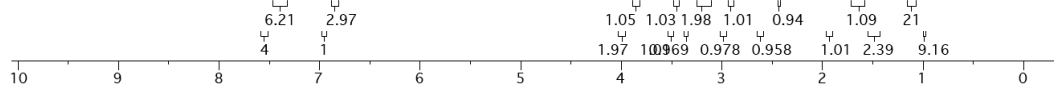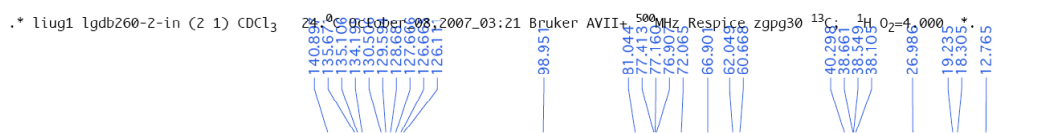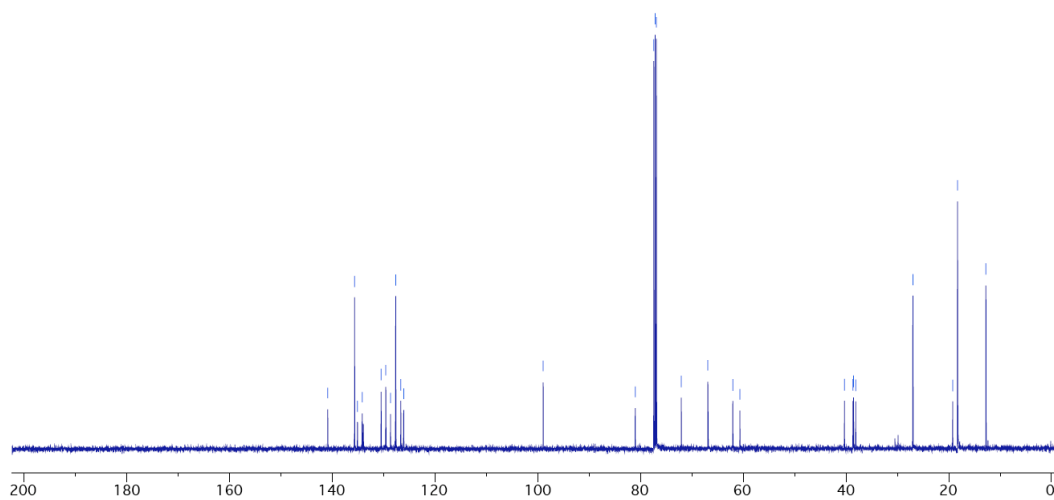



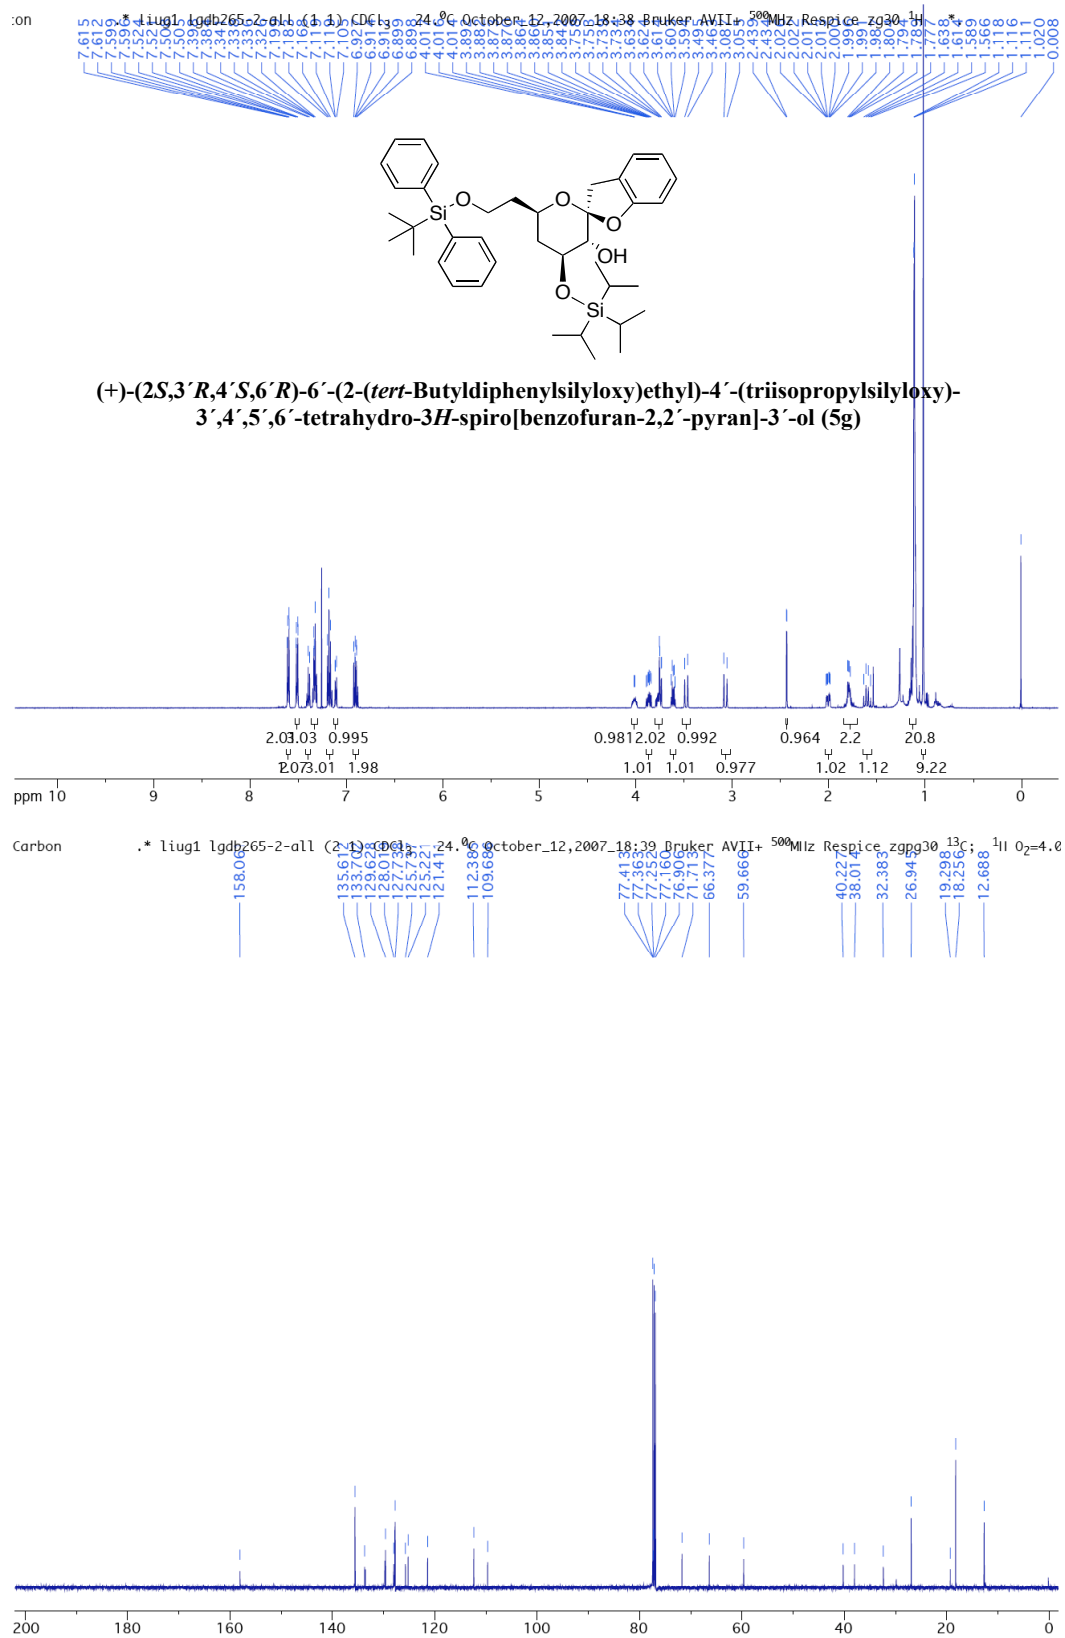

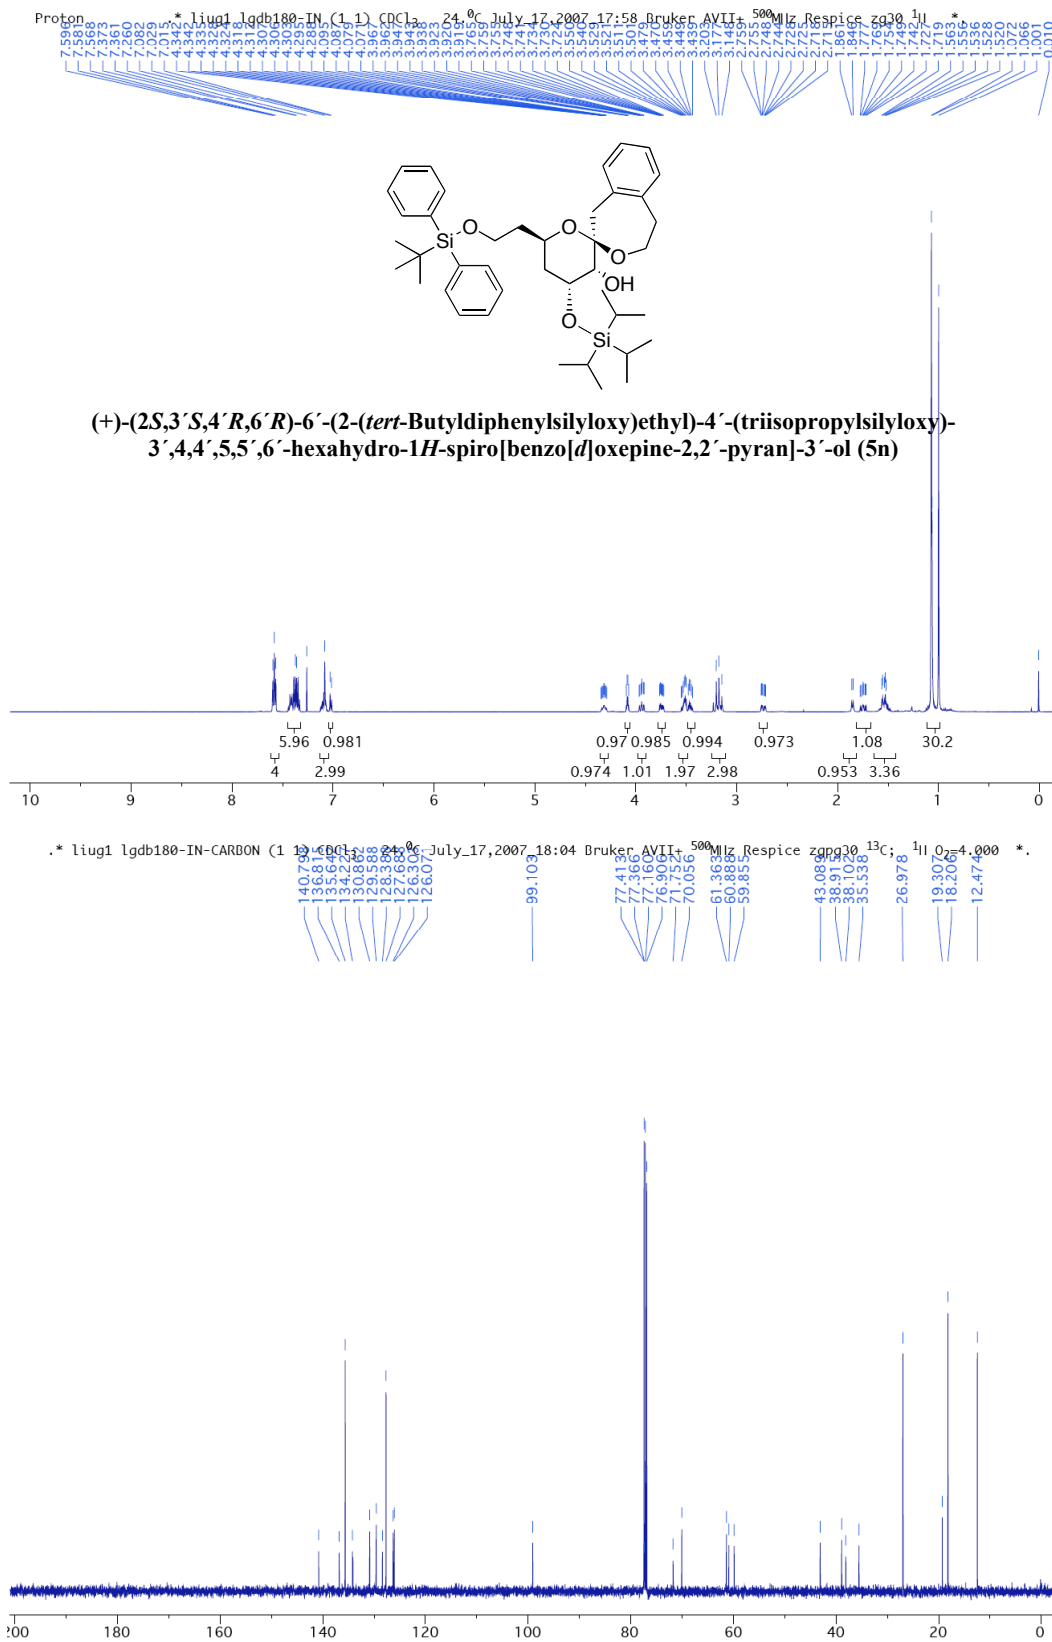





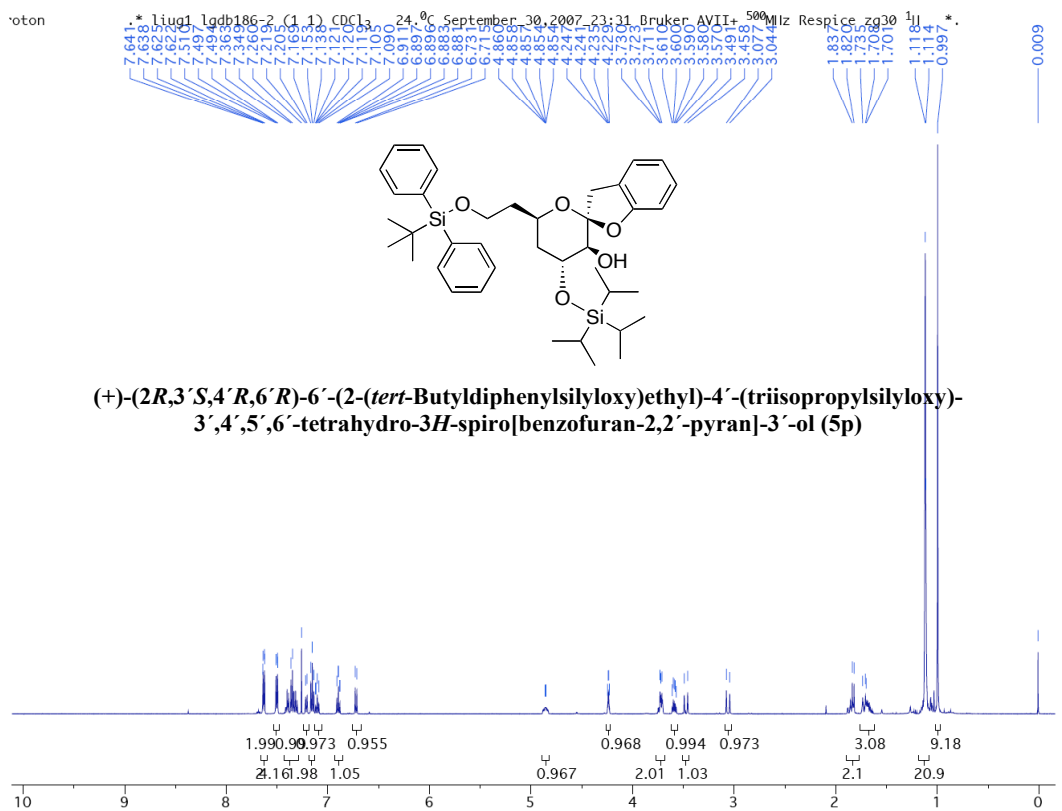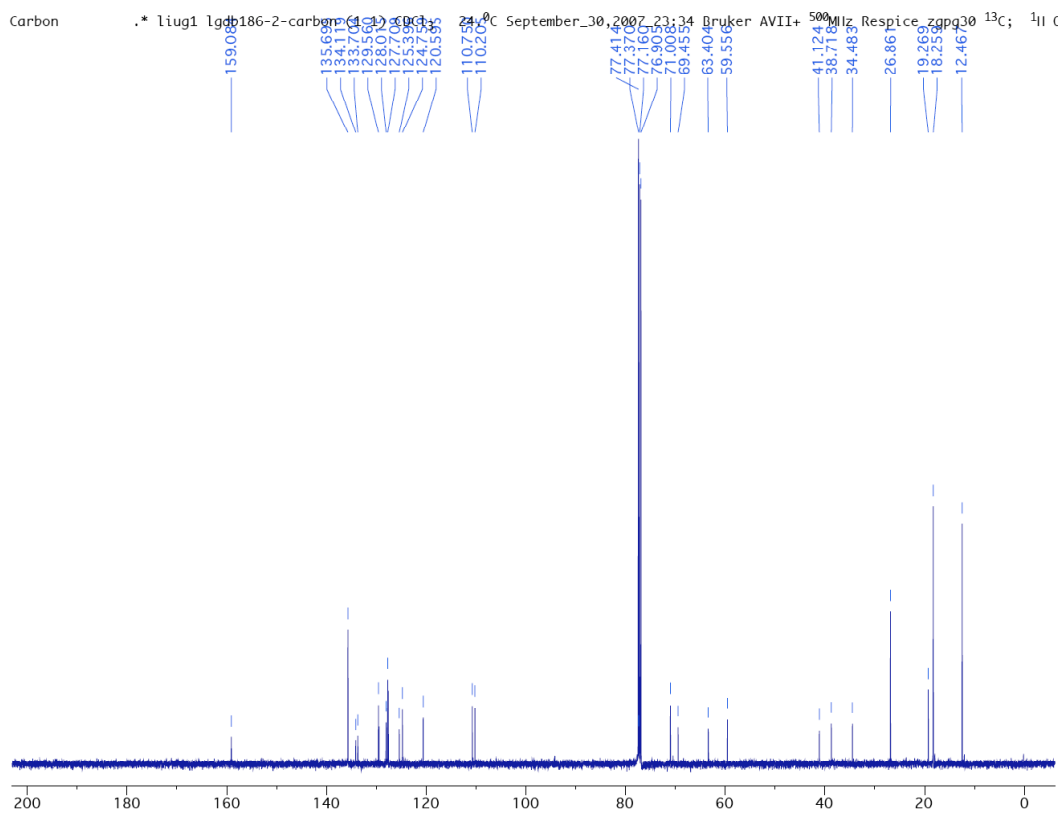

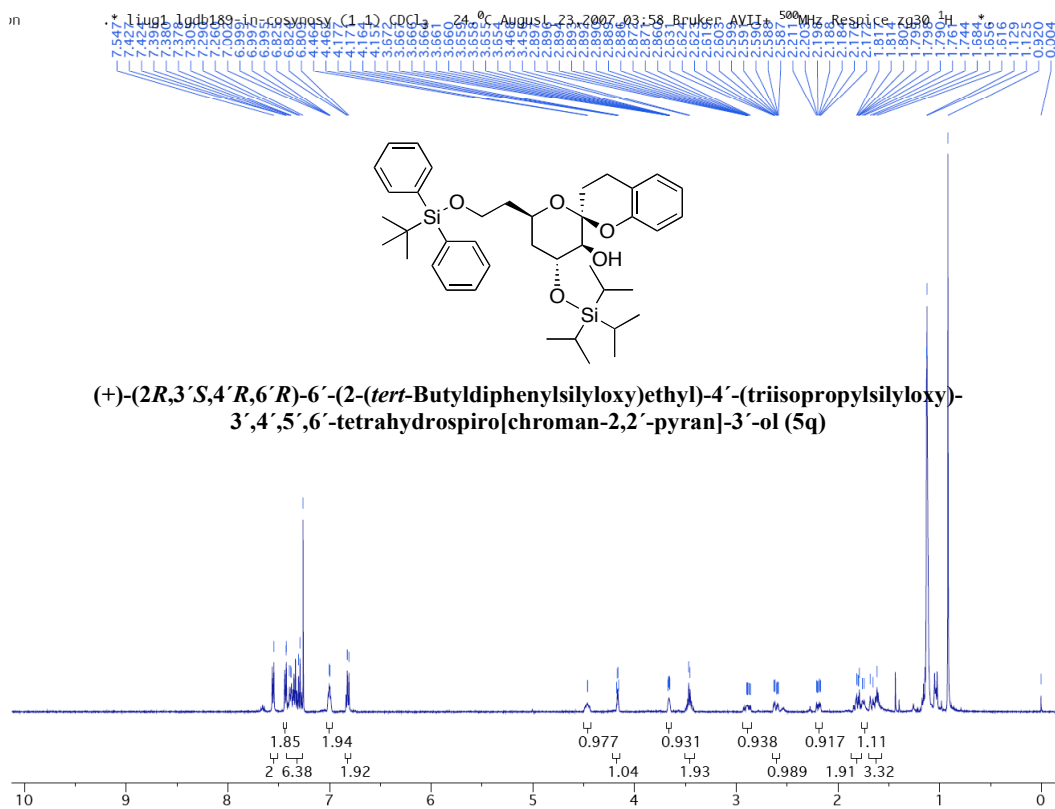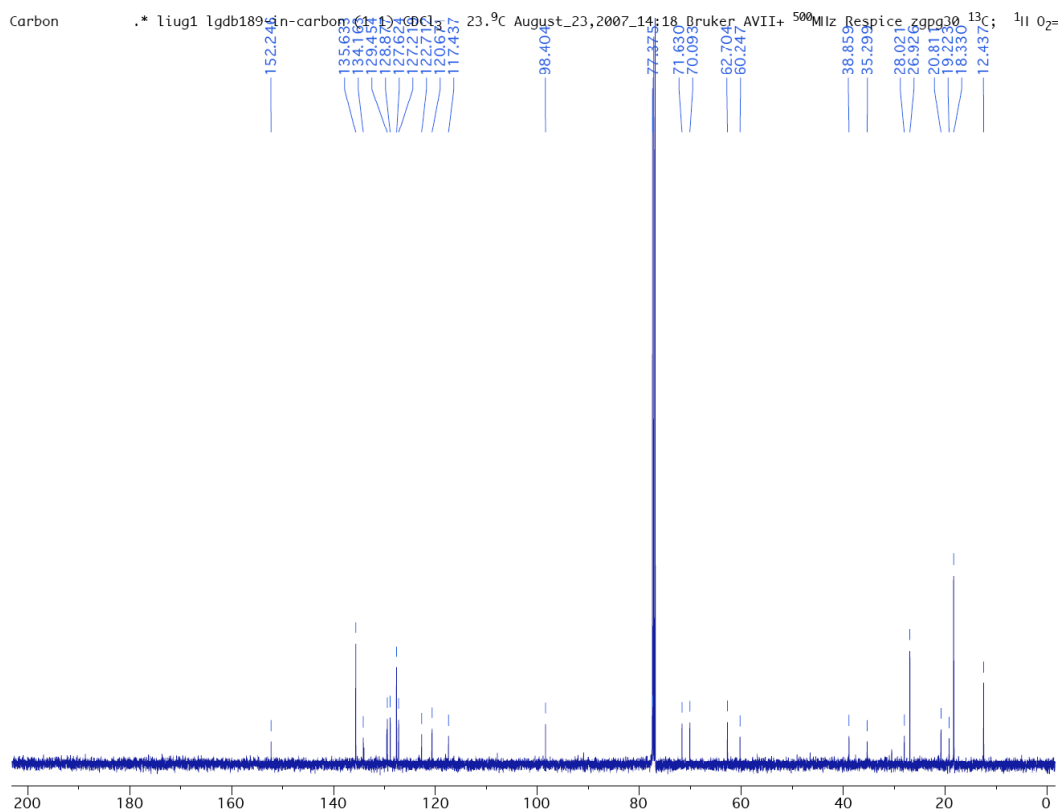

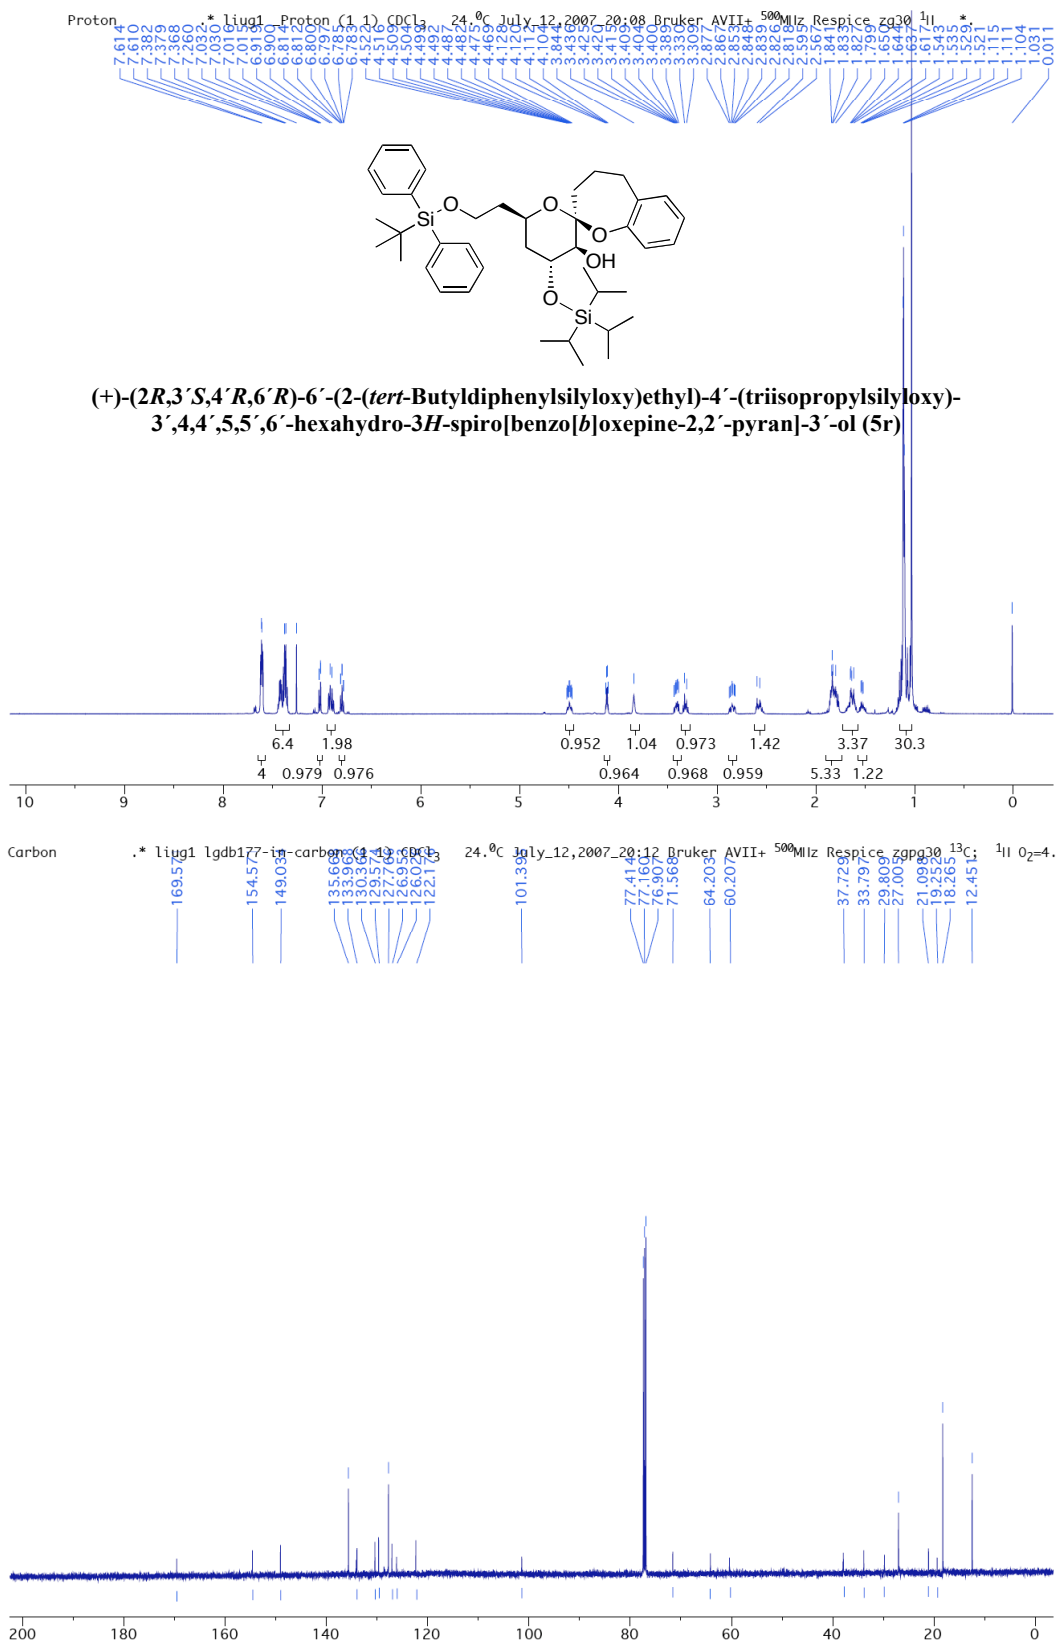

**E. DESILYLATION OF SPIROKETALS (7, 8)**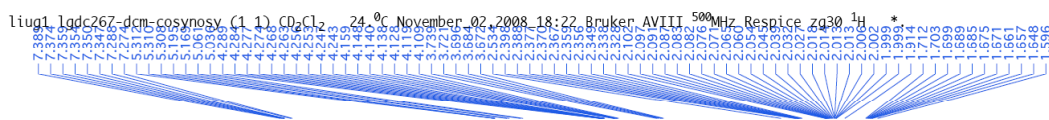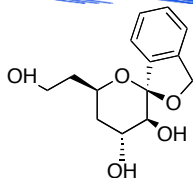

**(+)-(1R,3'S,4'R,6'R)-6'-(2-hydroxyethyl)-3',4',5',6'-tetrahydro-3H-spiro[isobenzofuran-1,2'-pyran]-3',4'-diol (7)**

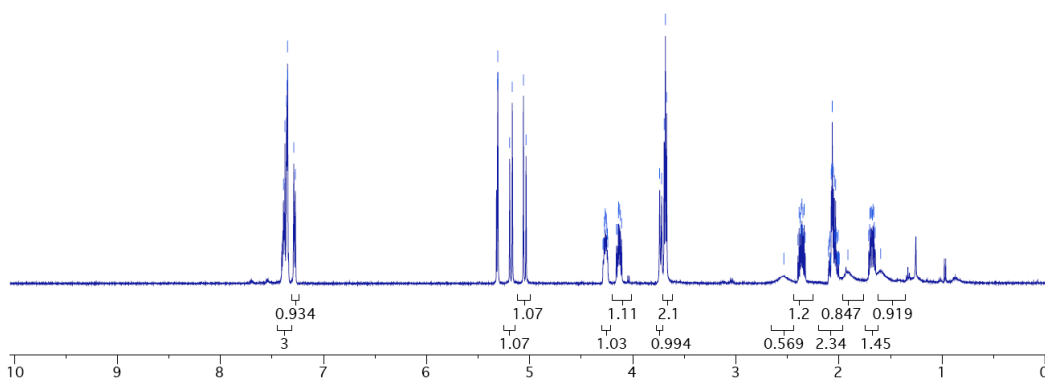

lgdc024-pure-carbon (1 1) CDCl<sub>3</sub> 24.4°C January 06 2008 18:30 Bruker AVIII 500MHz Respicc zpgg30 13C; 1H O2=4.000 \*

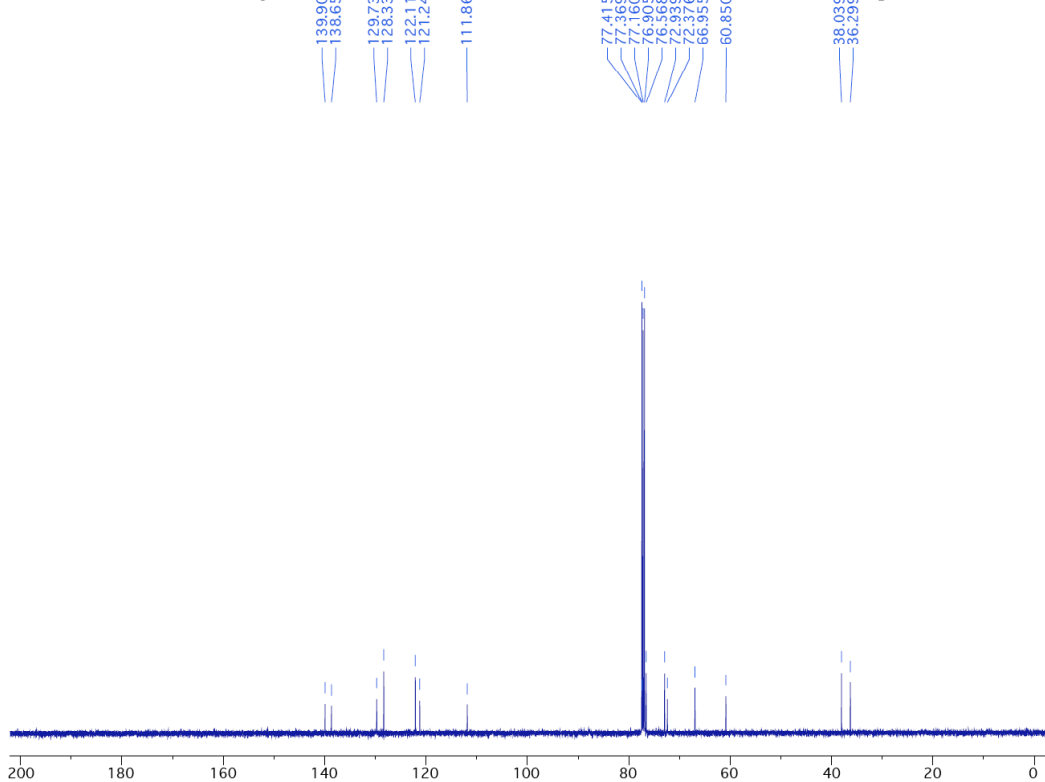

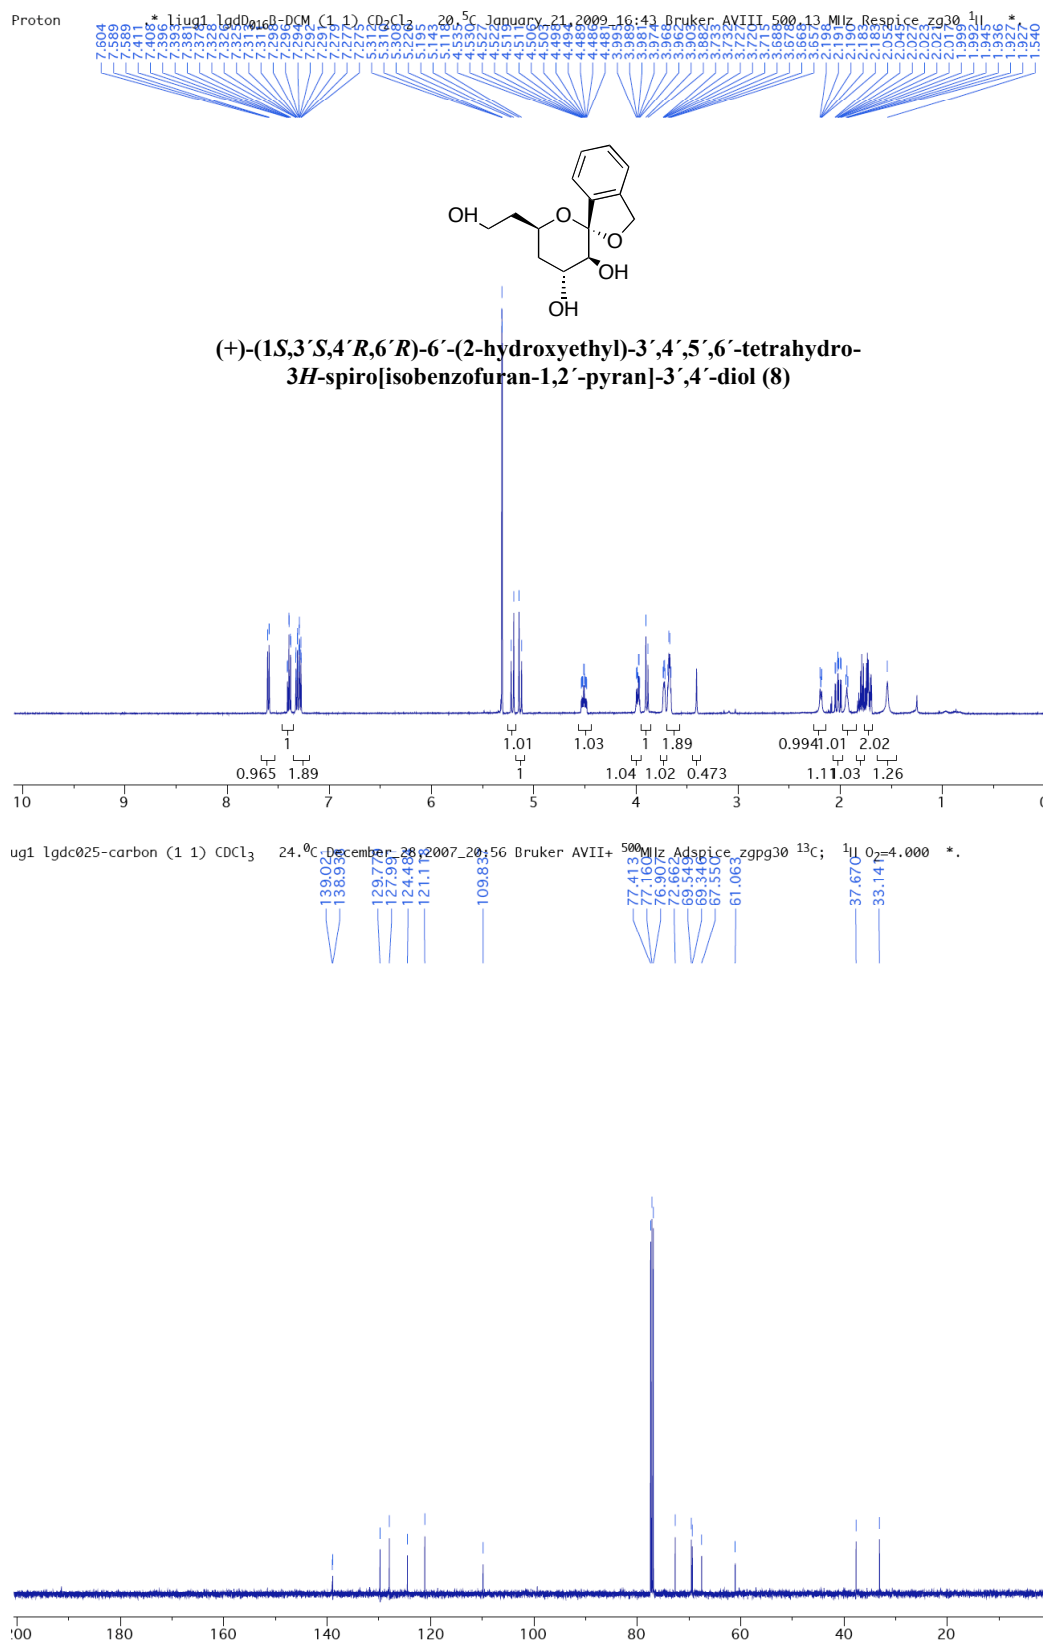

Supplement: NIHMS135268-supplement-1_si_001.pdf [file NIHMS135268-supplement-1_si_001.pdf]
